# Supplementary material
Source: ML conference proceedings conference paper supplement (https://openreview.net/forum?id=bFMWXJRn58)
Supplement: supplementary_material [file attachment]

---

# Gradient Clipping Helps in Non-Smooth Stochastic Optimization with Heavy-Tailed Noise

---

Anonymous Author(s)

Affiliation

Address

email

## Abstract

1 Thanks to their practical efficiency and random nature of the data, stochastic  
2 first-order methods are standard for training large-scale machine learning models.  
3 Random behavior may cause a particular run of an algorithm to result in a highly  
4 suboptimal objective value, whereas theoretical guarantees are usually proved  
5 for the expectation of the objective value. Thus, it is essential to theoretically  
6 guarantee that algorithms provide small objective residual with high probability.  
7 Existing methods for non-smooth stochastic convex optimization have complexity  
8 bounds with the dependence on the confidence level that is either negative-power or  
9 logarithmic but under an additional assumption of sub-Gaussian (light-tailed) noise  
10 distribution that may not hold in practice, e.g., in several NLP tasks. In our paper,  
11 we resolve this issue and derive the first high-probability convergence results with  
12 logarithmic dependence on the confidence level for non-smooth convex stochastic  
13 optimization problems with non-sub-Gaussian (heavy-tailed) noise. To derive our  
14 results, we propose novel stepsize rules for two stochastic methods with gradient  
15 clipping. Moreover, our analysis works for generalized smooth objectives with  
16 Hölder-continuous gradients, and for both methods, we provide an extension for  
17 strongly convex problems. Finally, our results imply that the first (accelerated)  
18 method we consider also has optimal iteration and oracle complexity in all the  
19 regimes, and the second one is optimal in the non-smooth setting.

## 20 1 Introduction

21 Stochastic first-order optimization methods like SGD [33], Adam [21], and their various modifi-  
22 cations are extremely popular in solving a number of different optimization problems, especially  
23 those appearing in statistics [37], machine learning, and deep learning [14]. The success of these  
24 methods in real-world applications motivates the researchers to investigate theoretical properties  
25 for the methods and to develop new ones with better convergence guarantees. Typically, stochastic  
26 methods are analyzed in terms of the convergence in expectation (see [13, 25, 16] and references  
27 therein), whereas high-probability complexity results are established much rarely. However, as  
28 illustrated in [15], guarantees in terms of the convergence in expectation have much worse correlation  
29 with the real behavior of the methods than high-probability convergence guarantees when the noise  
30 in the stochastic gradients has *heavy-tailed distribution*.

31 Recent studies [36, 35, 42] show that in several popular problems such as training BERT [38] on  
32 Wikipedia dataset the noise in the stochastic gradients is heavy-tailed. Moreover, in [42], the authors  
33 justify empirically that in such cases SGD works significantly worse than clipped-SGD [31] and  
34 Adam. Therefore, it is important to theoretically study the methods' convergence when the noise is  
35 heavy-tailed.

For convex and strongly convex problems with Lipschitz continuous gradient, i.e., smooth convex and strongly convex problems, this question was properly addressed in [26, 3, 15] where the first high-probability complexity bounds with logarithmic dependence on the confidence level were derived for the stochastic problems with heavy-tailed noise. However, a number of practically important problems are non-smooth *on the whole space* [41, 23]. For example, in deep neural network training, the loss function often grows polynomially fast when the norm of the network’s weights goes to infinity. Moreover, non-smoothness of the activation functions such as ReLU or loss functions such as hinge loss implies the non-smoothness of the whole problem. While being well-motivated by practical applications, the existing high-probability convergence guarantees for stochastic first-order methods applied to solve non-smooth convex optimization problems with heavy-tailed noise depend on the negative power of the confidence level that dramatically increases the number of iterations required to obtain high accuracy of the solution with probability close to one. Such a discrepancy in the theory between algorithms for stochastic smooth and non-smooth problems leads us to the natural question: *is it possible to obtain high-probability complexity bounds with logarithmic dependence on the confidence level for **non-smooth** convex stochastic problems with heavy-tailed noise?* In this paper, we give a positive answer to this question. To achieve this we focus on gradient clipping methods [31, 11, 24, 23, 41, 42].

## 1.1 Preliminaries

Before we describe our contributions in detail, we formally state the considered setup.

**Stochastic optimization.** We focus on the following problem

$$\min_{x \in \mathbb{R}^n} f(x), \quad f(x) = \mathbb{E}_\xi [f(x, \xi)], \quad (1)$$

where  $f(x)$  is a convex but possibly non-smooth function. Next, we assume that at each point  $x \in \mathbb{R}^n$  we have an access to the unbiased estimator  $\nabla f(x, \xi)$  of  $\nabla f(x)$  with uniformly bounded variance

$$\mathbb{E}_\xi [\nabla f(x, \xi)] = \nabla f(x), \quad \mathbb{E}_\xi [\|\nabla f(x, \xi) - \nabla f(x)\|_2^2] \leq \sigma^2, \quad \sigma > 0. \quad (2)$$

This assumption on the stochastic oracle is widely used in stochastic optimization literature [12, 13, 20, 22, 27]. We emphasize that we do not assume that the stochastic gradients have so-called “light tails” [22], i.e., sub-Gaussian noise distribution meaning that  $\mathbb{P}\{\|\nabla f(x, \xi) - \nabla f(x)\|_2 > b\} \leq 2 \exp(-b^2/(2\sigma^2))$  for all  $b > 0$ .

**Level of smoothness.** Finally, we assume that function  $f$  has  $(\nu, M_\nu)$ -Hölder continuous gradients on a compact set  $Q \subseteq \mathbb{R}^n$  for some  $\nu \in [0, 1]$ ,  $M_\nu > 0$  meaning that

$$\|\nabla f(x) - \nabla f(y)\|_2 \leq M_\nu \|x - y\|_2^\nu \quad \forall x, y \in Q. \quad (3)$$

When  $\nu = 1$  inequality (3) implies  $M_1$ -smoothness of  $f$ , and when  $\nu = 0$  we have that  $\nabla f(x)$  has bounded variation which is equivalent to being uniformly bounded. Moreover, when  $\nu = 0$  differentiability of  $f$  is not needed, and one can assume uniform boundedness of the subgradients of  $f$ . Linear regression in the case when the noise has generalized Gaussian distribution (Example 4.4 from [2]) serves as a natural example of the situation with  $\nu \in (0, 1)$ . Moreover, when (3) holds for  $\nu = 0$  and  $\nu = 1$  simultaneously then it holds for all  $\nu \in [0, 1]$  with  $M_\nu \leq M_0^{1-\nu} M_1^\nu$  [29]. As we show in our results, the set  $Q$  should contain the ball centered at the solution  $x^*$  of (1) with radius  $2R_0 = 2\|x^0 - x^*\|_2$ , where  $x^0$  is a starting point of the method, i.e., our analysis does not require (3) to hold on  $\mathbb{R}^n$ .

**High-probability convergence.** For a given accuracy  $\varepsilon > 0$  and confidence level  $\beta \in (0, 1)$  we are interested in finding  $\varepsilon$ -solutions of problem (1) with probability at least  $1 - \beta$ , i.e., such  $\hat{x}$  that  $\mathbb{P}\{f(\hat{x}) - f(x^*) \leq \varepsilon\} \geq 1 - \beta$ . For brevity, we will call such (in general, random) points  $\hat{x}$  as  $(\varepsilon, \beta)$ -solution of (1). Moreover, by high-probability complexity of a stochastic method  $\mathcal{M}$  we mean the sufficient number of oracle calls, i.e., number of  $\nabla f(x, \xi)$  computations, needed to guarantee that the output of  $\mathcal{M}$  is an  $(\varepsilon, \beta)$ -solution of (1).

Table 1: Summary of known and new high-probability complexity bounds for solving (1) with  $f$  being **convex** and having  $(\nu, M_\nu)$ -Hölder continuous gradients. Columns: “Ref.” = reference, “Complexity” = high-probability complexity ( $\varepsilon$  – accuracy,  $\beta$  – confidence level, numerical constants and logarithmic factors are omitted), “HT” = heavy-tailed noise, “UD” = unbounded domain, “HCC” = Hölder continuity of the gradient is required only on the compact set. The results labeled by  $\clubsuit$  are obtained from the convergence guarantees in expectation via Markov’s inequality. Negative-power dependencies on the confidence level  $\beta$  are colored in red.

| Method       | Ref.                 | Complexity                                                                                                                                                                                   | $\nu$    | HT? | UD? | HCC? |
|--------------|----------------------|----------------------------------------------------------------------------------------------------------------------------------------------------------------------------------------------|----------|-----|-----|------|
| SGD          | [27]                 | $\max \left\{ \frac{M_0^2 R_0^2}{\varepsilon^2}, \frac{\sigma^2 R_0^2}{\varepsilon^2} \right\}$                                                                                              | 0        | ✗   | ✓   | ✗    |
| AC-SA        | [12, 22]             | $\max \left\{ \sqrt{\frac{M_1 R_0^2}{\varepsilon}}, \frac{\sigma^2 R_0^2}{\varepsilon^2} \right\}$                                                                                           | 1        | ✗   | ✓   | ✗    |
| SIGMA        | [6]                  | $\max \left\{ \frac{M_\nu^{\frac{2}{1+3\nu}} R_0^{\frac{2(1+\nu)}{1+3\nu}}}{\varepsilon^{\frac{2}{1+3\nu}}}, \frac{\sigma^2 R_0^2}{\varepsilon^2} \right\}$                                  | $[0, 1]$ | ✗   | ✓   | ✗    |
| SGD          | [27] $\clubsuit$     | $\max \left\{ \frac{M_0^2 R_0^2}{\beta^2 \varepsilon^2}, \frac{\sigma^2 R_0^2}{\beta^2 \varepsilon^2} \right\}$                                                                              | 0        | ✓   | ✗   | ✗    |
| AC-SA        | [12, 22] $\clubsuit$ | $\max \left\{ \sqrt{\frac{M_1 R_0^2}{\beta \varepsilon}}, \frac{\sigma^2 R_0^2}{\beta^2 \varepsilon^2} \right\}$                                                                             | 1        | ✓   | ✓   | ✗    |
| SIGMA        | [6] $\clubsuit$      | $\max \left\{ \frac{M_\nu^{\frac{2}{1+3\nu}} R_0^{\frac{2(1+\nu)}{1+3\nu}}}{\beta^{\frac{2}{1+3\nu}} \varepsilon^{\frac{2}{1+3\nu}}}, \frac{\sigma^2 R_0^2}{\beta^2 \varepsilon^2} \right\}$ | $[0, 1]$ | ✓   | ✓   | ✗    |
| clipped-SSTM | [15]                 | $\max \left\{ \sqrt{\frac{M_1 R_0^2}{\varepsilon}}, \frac{\sigma^2 R_0^2}{\varepsilon^2} \right\}$                                                                                           | 1        | ✓   | ✓   | ✗    |
| clipped-SGD  | [15]                 | $\max \left\{ \frac{M_1 R_0^2}{\varepsilon}, \frac{\sigma^2 R_0^2}{\varepsilon^2} \right\}$                                                                                                  | 1        | ✓   | ✓   | ✗    |
| clipped-SSTM | Thm. 2.2             | $\max \left\{ \frac{M_\nu^{\frac{2}{1+3\nu}} R_0^{\frac{2(1+\nu)}{1+3\nu}}}{\varepsilon^{\frac{2}{1+3\nu}}}, \frac{\sigma^2 R_0^2}{\varepsilon^2} \right\}$                                  | $[0, 1]$ | ✓   | ✓   | ✓    |
| clipped-SGD  | Thm. 3.1             | $\max \left\{ \frac{M_\nu^{\frac{2}{1+\nu}} R_0^2}{\varepsilon^{\frac{2}{1+\nu}}}, \frac{\sigma^2 R_0^2}{\varepsilon^2} \right\}$                                                            | $[0, 1]$ | ✓   | ✓   | ✓    |

## 1.2 Contributions

- We propose novel stepsize rules for **clipped-SSTM** [15] to handle the problems with Hölder continuous gradients and derive high-probability complexity guarantees for convex stochastic optimization problems without using “light tails” assumption, i.e., we prove that our version of **clipped-SSTM**

$$\mathcal{O} \left( \max \left\{ D \ln \frac{2(1+\nu)}{1+3\nu} \frac{D}{\beta}, \frac{\sigma^2 R_0^2}{\varepsilon^2} \ln \frac{D}{\beta} \right\} \right), \quad D = \frac{M_\nu^{\frac{2}{1+3\nu}} R_0^{\frac{2(1+\nu)}{1+3\nu}}}{\varepsilon^{\frac{2}{1+3\nu}}}$$

high-probability complexity. Unlike all previous high-probability complexity results in this setup with  $\nu < 1$  (see Tbl. 1), our result depends only logarithmically on the confidence level  $\beta$  that is highly important when  $\beta$  is small. Moreover, up to the difference in logarithmic factors the derived complexity guarantees meet the known lower bounds [22, 18] obtained for the problems with light-tailed noise. In particular, when  $\nu = 1$  we recover accelerated convergence rate [30, 22]. That is, neglecting the logarithmic factors our results are unimprovable and, surprisingly coincide with the best-known results in the “light-tailed case”.

- We derive the first high-probability complexity bounds for **clipped-SGD** when the objective functions is convex with  $(\nu, M_\nu)$ -Hölder continuous gradient and the noise is heavy tailed., i.e., we derive

$$\mathcal{O} \left( \max \left\{ D^2, \max \left\{ D^{1+\nu}, \frac{\sigma^2 R_0^2}{\varepsilon^2} \right\} \ln \frac{D^2 + D^{1+\nu}}{\beta} \right\} \right), \quad D = \frac{M_\nu^{\frac{1}{1+\nu}} R_0}{\varepsilon^{\frac{1}{1+\nu}}}$$

high-probability complexity bound. Interestingly, when  $\nu = 0$  the derived bound for **clipped-SGD** has better dependence on the logarithms than the corresponding one for **clipped-SSTM**. Moreover, neglecting the dependence on  $\varepsilon$  under the logarithm, our bound for **clipped-SGD** has the same

Table 2: Summary of known and new high-probability complexity bounds for solving (1) with  $f$  being  $\mu$ -strongly convex and having  $(\nu, M_\nu)$ -Hölder continuous gradients. Columns: “Ref.” = reference, “Complexity” = high-probability complexity ( $\varepsilon$  – accuracy,  $\beta$  – confidence level, numerical constants and logarithmic factors are omitted), “HT” = heavy-tailed noise, “UD” = unbounded domain, “HCC” = Hölder continuity of the gradient is required only on the compact set. The results labeled by  $\clubsuit$  are obtained from the convergence guarantees in expectation via Markov’s inequality. Negative-power dependencies on the confidence level  $\beta$  are colored in red.

| Method         | Ref.                 | Complexity                                                                                                                                                                                                                                                                             | $\nu$    | HT? | UD? | HCC? |
|----------------|----------------------|----------------------------------------------------------------------------------------------------------------------------------------------------------------------------------------------------------------------------------------------------------------------------------------|----------|-----|-----|------|
| SGD            | [27]                 | $\max \left\{ \frac{M_0^2}{\mu\varepsilon}, \frac{\sigma^2}{\mu\varepsilon} \right\}$                                                                                                                                                                                                  | 0        | ✗   | ✓   | ✗    |
| AC-SA          | [12, 22]             | $\max \left\{ \sqrt{\frac{M_1}{\mu}}, \frac{\sigma^2}{\mu\varepsilon} \right\}$                                                                                                                                                                                                        | 1        | ✗   | ✓   | ✗    |
| SIGMA          | [6]                  | $\max \left\{ \hat{N}, \frac{\sigma^2}{\mu\varepsilon} \right\},$<br>$\hat{N} = \left( \frac{M_\nu}{\mu R_0^{1-\nu}} \right)^{\frac{2}{1+3\nu}} + \left( \frac{M_\nu^2}{\mu^{1+\nu} \varepsilon^{1-\nu}} \right)^{\frac{1}{1+3\nu}}$                                                   | $[0, 1]$ | ✗   | ✓   | ✗    |
| SGD            | [27] $\clubsuit$     | $\max \left\{ \frac{M_0^2}{\mu\beta\varepsilon}, \frac{\sigma^2}{\mu\beta\varepsilon} \right\}$                                                                                                                                                                                        | 0        | ✓   | ✗   | ✗    |
| AC-SA          | [12, 22] $\clubsuit$ | $\max \left\{ \sqrt{\frac{M_1}{\mu}}, \frac{\sigma^2}{\mu\beta\varepsilon} \right\}$                                                                                                                                                                                                   | 1        | ✓   | ✓   | ✗    |
| SIGMA          | [6] $\clubsuit$      | $\max \left\{ \hat{N}, \frac{\sigma^2}{\mu\hat{\varepsilon}} \right\}, \hat{\varepsilon} = \beta\varepsilon,$<br>$\hat{N} = \left( \frac{M_\nu}{\mu R_0^{1-\nu}} \right)^{\frac{2}{1+3\nu}} + \left( \frac{M_\nu^2}{\mu^{1+\nu} \hat{\varepsilon}^{1-\nu}} \right)^{\frac{1}{1+3\nu}}$ | $[0, 1]$ | ✓   | ✓   | ✗    |
| R-clipped-SSTM | [15]                 | $\max \left\{ \sqrt{\frac{M_1}{\mu}}, \frac{\sigma^2}{\mu\varepsilon^2} \right\}$                                                                                                                                                                                                      | 1        | ✓   | ✓   | ✗    |
| R-clipped-SGD  | [15]                 | $\max \left\{ \frac{M_1}{\mu}, \frac{\sigma^2}{\mu\varepsilon^2} \right\}$                                                                                                                                                                                                             | 1        | ✓   | ✓   | ✗    |
| R-clipped-SSTM | Thm. 2.1             | $\max \left\{ \hat{N}, \frac{\sigma^2}{\mu\varepsilon} \right\},$<br>$\hat{N} = \left( \frac{M_\nu}{\mu R_0^{1-\nu}} \right)^{\frac{2}{1+3\nu}} + \left( \frac{M_\nu^2}{\mu^{1+\nu} \varepsilon^{1-\nu}} \right)^{\frac{1}{1+3\nu}}$                                                   | $[0, 1]$ | ✓   | ✓   | ✓    |
| R-clipped-SGD  | Thm. 3.2             | $\max \left\{ \frac{M_\nu^{\frac{2}{1+\nu}}}{\mu^{\frac{2}{1+\nu}} R_0^{\frac{2(1-\nu)}{1+\nu}}}, \frac{M_\nu^{\frac{2}{1+\nu}}}{\mu\varepsilon^{\frac{1-\nu}{1+\nu}}}, \frac{\sigma^2}{\mu\varepsilon} \right\}$                                                                      | $[0, 1]$ | ✓   | ✓   | ✓    |

dependence on the confidence level as the tightest known result in this case under the “light tails” assumption [17].

- Using restarts technique we extend the obtained results for clipped-SSTM and clipped-SGD to the strongly convex case (see Tbl. 2). As in the convex case, the obtained results are superior to all previous known results in the general setup we consider.
- As one of the key contributions of this work, we emphasize that in our theoretical results it is sufficient to assume Hölder continuity of the gradients of  $f$  only on the ball with radius  $2R_0 = 2\|x^0 - x^*\|_2$  and centered at a solution of the problem. This makes our results applicable to much larger class of problems than functions with Hölder continuous gradients on  $\mathbb{R}^n$ , e.g., our analysis works even for polynomially growing objectives.
- To test the performance of the considered methods we conduct several numerical experiments on image classification and NLP tasks, and observe that 1) clipped-SSTM and clipped-SGD show a comparable performance with SGD on the image classification task, when the noise distribution is almost sub-Gaussian, 2) converge much faster than SGD on the NLP task, when the noise distribution is heavy-tailed, and 3) clipped-SSTM achieves a comparable performance with Adam on the NLP task enjoying both the best known theoretical guarantees and good practical performance.

### 1.3 Related work

**Light-tailed noise.** The theory of high-probability complexity bounds for convex stochastic optimization with light-tailed noise is well-developed. Lower bounds and optimal methods for the problems with  $(\nu, M_\nu)$ -Hölder continuous gradients are obtained in [27] for  $\nu = 0$ , and in [12] for  $\nu = 1$ . Up to the logarithmic dependencies these high-probability convergence bounds coincide with

the corresponding results for the convergence in expectation (see first two rows of Tbl. 1) While not being directly derived in the literature, the lower bound for the case when  $\nu \in (0, 1)$  can be obtained as a combination of lower bounds in the deterministic [28, 18] and smooth stochastic settings [12]. The corresponding optimal methods are analyzed in [4, 6] through the lens of inexact oracle.

**Heavy-tailed noise.** Unlike in the “light-tailed” case, the first theoretical guarantees with reasonable dependence on both the accuracy  $\varepsilon$  and the confidence level  $\beta$  appeared just recently. In [26], the first such results without acceleration [30] were derived for Mirror Descent with special truncation technique for smooth ( $\nu = 1$ ) convex problems on a bounded domain, and then were accelerated and extended in [15]. For the strongly convex problems the first accelerated high-probability convergence guarantees were obtained in [3] for the special method called proxBoost requiring solving auxiliary nontrivial problems at each iteration. These bounds were tightened in [15].

In contrast, for the case when  $\nu < 1$  and, in particular, when  $\nu = 0$  the best-known high-probability complexity bounds suffer from the negative-power dependence on the confidence level  $\beta$ , i.e., have a factor  $1/\beta^\alpha$  for some  $\alpha > 0$ , that affects the convergence rate dramatically for small enough  $\beta$ . Without additional assumptions on the tails these results are obtained via Markov’s inequality  $\mathbb{P}\{f(x) - f(x^*) > \varepsilon\} < \mathbb{E}[f(x) - f(x^*)]/\varepsilon$  from the guarantees for the convergence in expectation to the accuracy  $\varepsilon\beta$ , see the results labeled by  $\clubsuit$  in Tbl. 1. Under an additional assumption on noise tails that  $\mathbb{P}\{\|\nabla f(x, \xi) - \nabla f(x)\|_2^2 > s\sigma^2\} = O(s^{-\alpha})$  for  $\alpha > 2$  these results can be tightened [10] when  $\nu = 0$  as  $O\left(M_0^2 R_0^2 \max\left\{\ln(\beta^{-1})/\varepsilon^2, (1/\beta\varepsilon^\alpha)^{2/(3\alpha-2)}\right\}\right)$  without removing the negative-power dependence on the confidence level  $\beta$ . Different stepsize policies allow to change the last term in  $\max$  to  $\beta^{-\frac{1}{2\alpha-1}} \varepsilon^{-\frac{2\alpha}{2\alpha-1}}$  without removing the negative-power dependence on  $\beta$ .

**Gradient clipping.** The methods based on gradient clipping [31] and normalization [19] are popular in different machine learning and deep learning tasks due to their robustness in practice to the noise in the stochastic gradients and rapid changes of the objective function [14]. In [41, 23], clipped-GD and clipped-SGD are theoretically studied in applications to non-smooth problems that can grow polynomially fast when  $\|x - x^*\|_2 \rightarrow \infty$  showing the superiority of gradient clipping methods to the methods without clipping. The results from [41] are obtained for non-convex problems with almost surely bounded noise, and in [23], the authors derive the stability and expectation convergence guarantees for strongly convex under assumption that the central  $p$ -th moment of the stochastic gradient is bounded for  $p \geq 2$ . Since the authors of [23] do not provide convergence guarantees with explicit dependencies on all important parameters of the problem it complicates direct comparison with our results. Nevertheless, convergence guarantees from [23] are sub-linear and are given for the convergence in expectation, and, as a consequence, the corresponding high-probability convergence results obtained via Markov’s inequality also suffer from negative-power dependence on the confidence level. Next, in [42], the authors establish several expectation convergence guarantees for clipped-SGD and prove their optimality in the non-convex case under assumption that the central  $\alpha$ -moment of the stochastic gradient is uniformly bounded, where  $\alpha \in (1, 2]$ . It turns out that clipped-SGD is able to converge even when  $\alpha < 2$ , whereas vanilla SGD can diverge in this setting.

## 2 Clipped Stochastic Similar Triangles Method

In this section, we propose a novel variation of Clipped Stochastic Similar Triangles Method [15] adjusted to the class of objectives with Hölder continuous gradients (clipped-SSTM, see Alg. 1).

The method is based on the clipping of the stochastic gradients:

$$\text{clip}(\nabla f(x, \xi), \lambda) = \min\left\{1, \frac{\lambda}{\|\nabla f(x, \xi)\|_2}\right\} \nabla f(x, \xi) \quad (4)$$

where  $\nabla f(x, \xi) = \frac{1}{m} \sum_{i=1}^m \nabla f(x, \xi_i)$  is a mini-batched stochastic gradient. Gradient clipping ensures that the resulting vector has a norm bounded by the clipping level  $\lambda$ . Since the clipped stochastic gradient cannot have arbitrary large norm, the clipping helps to avoid unstable behavior of the method when the noise is heavy-tailed and the clipping level  $\lambda$  is properly adjusted.

However, unlike the stochastic gradient, clipped stochastic gradient is a *biased* estimate of  $\nabla f(x)$ : the smaller the clipping level the larger the bias. The biasedness of the clipped stochastic gradient

---

**Algorithm 1** Clipped Stochastic Similar Triangles Method (clipped-SSTM): case  $\nu \in [0, 1]$ 


---

**Input:** starting point  $x^0$ , number of iterations  $N$ , batchsizes  $\{m_k\}_{k=1}^N$ , stepsize parameter  $\alpha$ , clipping parameter  $B$ , Hölder exponent  $\nu \in [0, 1]$ .

```

1: Set  $A_0 = \alpha_0 = 0, y^0 = z^0 = x^0$ 
2: for  $k = 0, \dots, N - 1$  do
3:   Set  $\alpha_{k+1} = \alpha(k+1)^{\frac{2\nu}{1+\nu}}, A_{k+1} = A_k + \alpha_{k+1}, \lambda_{k+1} = \frac{B}{\alpha_{k+1}}$ 
4:    $x^{k+1} = (A_k y^k + \alpha_{k+1} z^k) / A_{k+1}$ 
5:   Draw mini-batch  $m_k$  of fresh i.i.d. samples  $\xi_1^k, \dots, \xi_{m_k}^k$  and compute  $\nabla f(x^{k+1}, \xi^k) = \frac{1}{m_k} \sum_{i=1}^{m_k} \nabla f(x^{k+1}, \xi_i^k)$ 
6:   Compute  $\tilde{\nabla} f(x^{k+1}, \xi^k) = \text{clip}(\nabla f(x^{k+1}, \xi^k), \lambda_{k+1})$  using (4)
7:    $z^{k+1} = z^k - \alpha_{k+1} \tilde{\nabla} f(x^{k+1}, \xi^k)$ 
8:    $y^{k+1} = (A_k y^k + \alpha_{k+1} z^{k+1}) / A_{k+1}$ 
9: end for
Output:  $y^N$ 

```

---

167 complicates the analysis of the method. On the other hand, to circumvent the negative effect of  
 168 the heavy-tailed noise on the high-probability convergence one should choose  $\lambda$  to be not too large.  
 169 Therefore, the question on the appropriate choice of the clipping level is highly non-trivial.

170 Fortunately, there exists a simple but insightful observation that helps us to obtain the right formula  
 171 for the clipping level  $\lambda_k$  in clipped-SSTM: if  $\lambda_k$  is chosen in such a way that  $\|\nabla f(x^k)\|_2 \leq \lambda_k/2$   
 172 with high probability, then for the realizations  $\nabla f(x^{k+1}, \xi^k)$  of the mini-batched stochastic gradient  
 173 such that  $\|\nabla f(x^{k+1}, \xi^k) - \nabla f(x^{k+1})\|_2 \leq \lambda_k/2$  the clipping is an identity operator. Next, if the  
 174 probability mass of such realizations is big enough then the bias of the clipped stochastic gradient is  
 175 properly bounded that helps to derive needed convergence guarantees. It turns out that the choice  
 176  $\lambda_k \sim 1/\alpha_k$  ensures the method convergence with needed rate and high enough probability.

177 Guided by this observation we derive the precise expressions for all the parameters of clipped-SSTM  
 178 and derive high-probability complexity bounds for the method. Below we provide a simplified version  
 179 of the main result for clipped-SSTM in the convex case. The complete formulation and the full proof  
 180 of the theorem are deferred to Appendix B.1 (see Thm. B.1).

181 **Theorem 2.1.** Assume that function  $f$  is convex and its gradient satisfy (3) with  $\nu \in [0, 1]$ ,  $M_\nu > 0$   
 182 on  $Q = B_{2R_0} = \{x \in \mathbb{R}^n \mid \|x - x^*\|_2 \leq 2R_0\}$ , where  $R_0 \geq \|x^0 - x^*\|_2$ . Then there exist such  
 183 a choice of parameters that clipped-SSTM achieves  $f(y^N) - f(x^*) \leq \varepsilon$  with probability at least

184  $1 - \beta$  after  $\mathcal{O}\left(D \ln \frac{2(1+\nu)}{1+3\nu} \frac{D}{\beta}\right)$  iterations with  $D = \frac{M_\nu^{\frac{2}{1+3\nu}} R_0^{\frac{2(1+\nu)}{1+3\nu}}}{\varepsilon^{\frac{2}{1+3\nu}}}$  and requires

$$\mathcal{O}\left(\max\left\{D \ln \frac{2(1+\nu)}{1+3\nu} \frac{D}{\beta}, \frac{\sigma^2 R_0^2}{\varepsilon^2} \ln \frac{D}{\beta}\right\}\right) \text{ oracle calls.} \quad (5)$$

185 The obtained result has only logarithmic dependence on the confidence level  $\beta$  and optimal depen-  
 186 dence on the accuracy  $\varepsilon$  up to logarithmic factors [22, 18] for all  $\nu \in [0, 1]$ . Moreover, we emphasize  
 187 that our result does not require  $f$  to have  $(\nu, M_\nu)$ -Hölder continuous gradient on the whole space.  
 188 This is because we prove that for the proposed choice of parameters the iterates of clipped-SSTM  
 189 stay inside the ball  $B_{2R_0} = \{x \in \mathbb{R}^n \mid \|x - x^*\|_2 \leq 2R_0\}$  with probability at least  $1 - \beta$ , and,  
 190 as a consequence, Hölder continuity of the gradient is required only inside this ball. In particular,  
 191 this means that the better starting point leads not only to the reduction of  $R_0$ , but also it can reduce  
 192  $M_\nu$ . Moreover, our result is applicable to much wider class of functions than the standard class of  
 193 functions with Hölder continuous gradients in  $\mathbb{R}^n$ , e.g., to the problems with polynomial growth.

194 For the strongly convex problems, we consider restarted version of Alg. 1 (R-clipped-SSTM, see  
 195 Alg. 2) and derive high-probability complexity result for this version. Below we provide a simplified  
 196 version of the result. The complete formulation and the full proof of the theorem are deferred to  
 197 Appendix B.2 (see Thm. B.2).

198 **Theorem 2.2.** Assume that function  $f$  is  $\mu$ -strongly convex and its gradient satisfy (3) with  $\nu \in [0, 1]$ ,  
 199  $M_\nu > 0$  on  $Q = B_{2R_0} = \{x \in \mathbb{R}^n \mid \|x - x^*\|_2 \leq 2R_0\}$ , where  $R_0 \geq \|x^0 - x^*\|_2$ . Then there exist



---

**Algorithm 2** Restarted clipped-SSTM (R-clipped-SSTM): case  $\nu \in [0, 1]$

---

**Input:** starting point  $x^0$ , number of restarts  $\tau$ , number of steps of clipped-SSTM in restarts  $\{N_t\}_{t=1}^\tau$ , batchsizes  $\{m_k^1\}_{k=1}^{N_1-1}, \{m_k^2\}_{k=1}^{N_2-1}, \dots, \{m_k^\tau\}_{k=1}^{N_\tau-1}$ , stepsize parameters  $\{\alpha^t\}_{t=1}^\tau$ , clipping parameters  $\{B_t\}_{t=1}^\tau$ , Hölder exponent  $\nu \in [0, 1]$ .

- 1:  $\hat{x}^0 = x^0$
- 2: **for**  $t = 1, \dots, \tau$  **do**
- 3:     Run clipped-SSTM (Alg. 1) for  $N_t$  iterations with batchsizes  $\{m_k^t\}_{k=1}^{N_t-1}$ , stepsize parameter  $\alpha_t$ , clipping parameter  $B_t$ , and starting point  $\hat{x}^{t-1}$ . Define the output of clipped-SSTM by  $\hat{x}^t$ .
- 4: **end for**

**Output:**  $\hat{x}^\tau$

---

200 such a choice of parameters that R-clipped-SSTM achieves  $f(\hat{x}^\tau) - f(x^*) \leq \varepsilon$  with probability at  
 201 least  $1 - \beta$  after

$$\hat{N} = O\left(D \ln^{\frac{2(1+\nu)}{1+3\nu}} \frac{D}{\beta}\right), \quad D = \max\left\{\left(\frac{M_\nu}{\mu R_0^{1-\nu}}\right)^{\frac{2}{1+3\nu}} \ln \frac{\mu R_0^2}{\varepsilon}, \left(\frac{M_\nu^2}{\mu^{1+\nu} \varepsilon^{1-\nu}}\right)^{\frac{1}{1+3\nu}}\right\} \quad (6)$$

202 iterations of Alg. 1 in total and requires

$$O\left(\max\left\{D \ln^{\frac{2(1+\nu)}{1+3\nu}} \frac{D}{\beta}, \frac{\sigma^2}{\mu \varepsilon} \ln \frac{D}{\beta}\right\}\right) \text{ oracle calls.} \quad (7)$$

203 Again, the obtained result has only logarithmic dependence on the confidence level  $\beta$  and, as our  
 204 result in the convex case, it has optimal dependence on the accuracy  $\varepsilon$  up to logarithmic factors  
 205 depending on  $\beta$  [22, 18] for all  $\nu \in [0, 1]$ .

### 206 3 SGD with clipping

207 In this section, we present a new variant of clipped-SGD [31] properly adjusted to the class of  
 208 objectives with  $(\nu, M_\nu)$ -Hölder continuous gradients (see Alg. 3).

---

**Algorithm 3** Clipped Stochastic Gradient Descent (clipped-SGD): case  $\nu \in [0, 1]$

---

**Input:** starting point  $x^0$ , number of iterations  $N$ , batchsize  $m$ , stepsize  $\gamma$ , clipping parameter  $B > 0$ .

- 1: **for**  $k = 0, \dots, N-1$  **do**
- 2:     Draw mini-batch of  $m$  fresh i.i.d. samples  $\xi_1^k, \dots, \xi_m^k$  and compute  $\nabla f(x^{k+1}, \xi^k) = \frac{1}{m} \sum_{i=1}^m \nabla f(x^{k+1}, \xi_i^k)$
- 3:     Compute  $\tilde{\nabla} f(x^k, \xi^k) = \text{clip}(\nabla f(x^k, \xi^k), \lambda)$  using (4) with  $\lambda = B/\gamma$
- 4:      $x^{k+1} = x^k - \gamma \tilde{\nabla} f(x^k, \xi^k)$
- 5: **end for**

**Output:**  $\bar{x}^N = \frac{1}{N} \sum_{k=0}^{N-1} x^k$

---

209 We emphasize that as for clipped-SSTM we use clipping level  $\lambda$  inversely proportional to the stepsize  
 210  $\gamma$ . Below we provide a simplified version of the main result for clipped-SGD in the convex case. The  
 211 complete formulation and the full proof of the theorem are deferred to Appendix C.1 (see Thm. C.1).

212 **Theorem 3.1.** Assume that function  $f$  is convex and its gradient satisfy (3) with  $\nu \in [0, 1]$ ,  $M_\nu > 0$   
 213 on  $Q = B_{2R_0} = \{x \in \mathbb{R}^n \mid \|x - x^*\|_2 \leq 2R_0\}$ , where  $R_0 \geq \|x^0 - x^*\|_2$ . Then there exist such a  
 214 choice of parameters that clipped-SGD achieves  $f(\bar{x}^N) - f(x^*) \leq \varepsilon$  with probability at least  $1 - \beta$   
 215 after

$$O\left(\max\left\{D^2, D^{1+\nu} \ln \frac{D^2 + D^{1+\nu}}{\beta}\right\}\right), \quad D = \frac{M_\nu^{\frac{1}{1+\nu}} R_0}{\varepsilon^{\frac{1}{1+\nu}}} \quad (8)$$

216 iterations and requires

$$O\left(\max\left\{D^2, \max\left\{D^{1+\nu}, \frac{\sigma^2 R_0^2}{\varepsilon^2}\right\} \ln \frac{D^2 + D^{1+\nu}}{\beta}\right\}\right) \text{ oracle calls.} \quad (9)$$

As all our results in the paper, this result for clipped-SGD has two important features: 1) the dependence on the confidence level  $\beta$  is logarithmic and 2) Hölder continuity is required only on the ball  $B_{2R_0}$  centered at the solution. Moreover, up to the difference in the expressions under the logarithm the dependence on  $\varepsilon$  in the result for clipped-SGD is the same as in the tightest known results for non-accelerated SGD-type methods [4, 17]. Finally, we emphasize that for  $\nu < 1$  the logarithmic factors appearing in the complexity bound for clipped-SSTM are worse than the corresponding factor in the complexity bound for clipped-SGD. Therefore, clipped-SGD has the best known high-probability complexity results in the case when  $\nu = 0$  and  $f$  is convex.

For the strongly convex problems, we consider restarted version of Alg. 3 (R-clipped-SGD, see Alg. 4) and derive high-probability complexity result for this version. Below we provide a simplified

---

**Algorithm 4** Restarted clipped-SGD (R-clipped-SGD): case  $\nu \in [0, 1]$

---

**Input:** starting point  $x^0$ , number of restarts  $\tau$ , number of steps of clipped-SGD in restarts  $\{N_t\}_{t=1}^\tau$ , batchsizes  $\{m_t\}_{t=1}^\tau$ , stepsizes  $\{\gamma_t\}_{t=1}^\tau$ , clipping parameters  $\{B_t\}_{t=1}^\tau$   
1:  $\hat{x}^0 = x^0$   
2: **for**  $t = 1, \dots, \tau$  **do**  
3:   Run clipped-SGD (Alg. 3) for  $N_t$  iterations with batchsize  $m_t$ , stepsize  $\gamma_t$ , clipping parameter  $B_t$ , and starting point  $\hat{x}^{t-1}$ . Define the output of clipped-SGD by  $\hat{x}^t$ .  
4: **end for**  
**Output:**  $\hat{x}^\tau$

---

version of the result. The complete formulation and the full proof of the theorem are deferred to Appendix C.2 (see Thm. C.2).

**Theorem 3.2.** Assume that function  $f$  is  $\mu$ -strongly convex and its gradient satisfy (3) with  $\nu \in [0, 1]$ ,  $M_\nu > 0$  on  $Q = B_{2R_0} = \{x \in \mathbb{R}^n \mid \|x - x^*\|_2 \leq 2R_0\}$ , where  $R_0 \geq \|x^0 - x^*\|_2$ . Then there exist such a choice of parameters that R-clipped-SGD achieves  $f(\bar{x}^N) - f(x^*) \leq \varepsilon$  with probability at least  $1 - \beta$  after

$$\mathcal{O} \left( \max \left\{ D_1^{\frac{2}{1+\nu}} \ln \frac{\mu R_0^2}{\varepsilon}, D_2^{\frac{2}{1+\nu}}, \max \left\{ D_1 \ln \frac{\mu R_0^2}{\varepsilon}, D_2 \right\} \ln \frac{D}{\beta} \right\} \right)$$

iterations of Alg. 3 in total and requires

$$\mathcal{O} \left( \max \left\{ D_1^{\frac{2}{1+\nu}} \ln \frac{\mu R_0^2}{\varepsilon}, D_2^{\frac{2}{1+\nu}}, \max \left\{ D_1 \ln \frac{\mu R_0^2}{\varepsilon}, D_2, \frac{\sigma^2}{\mu \varepsilon} \right\} \ln \frac{D}{\beta} \right\} \right) \text{ oracle calls, where}$$

$$D_1 = \frac{M_\nu}{\mu R_0^{1-\nu}}, \quad D_2 = \frac{M_\nu}{\mu^{\frac{1+\nu}{2}} \varepsilon^{\frac{1-\nu}{2}}}, \quad D = (D_1^{\frac{2}{1+\nu}} + D_1) \ln \frac{\mu R_0^2}{\varepsilon} + D_2 + D_2^{\frac{2}{1+\nu}}.$$

As in the convex case, for  $\nu < 1$  the log factors appearing in the complexity bound for R-clipped-SSTM are worse than the corresponding factor in the bound for R-clipped-SGD. Thus, R-clipped-SGD has the best known high-probability complexity results for strongly convex  $f$  and  $\nu = 0$ .

## 4 Numerical experiments

We tested the performance of the methods on the following problems:

- BERT fine-tuning on CoLA dataset [39]. We use pretrained BERT from Transformers library [40] (bert-base-uncased) and freeze all layers except the last two linear ones.
- ResNet-18 training on ImageNet-100 (first 100 classes of ImageNet [34]).

First, we study the noise distribution for both problem as follows: at the starting point we sample large enough number of batched stochastic gradients  $\nabla f(x^0, \xi_1), \dots, \nabla f(x^0, \xi_K)$  with batchsize 32 and plot the histograms for  $\|\nabla f(x^0, \xi_1) - \nabla f(x^0)\|_2, \dots, \|\nabla f(x^0, \xi_K) - \nabla f(x^0)\|_2$ , see Fig. 1. As one can see, the noise distribution for BERT + CoLA is substantially non-sub-Gaussian, whereas the distribution for ResNet-18 + Imagenet-100 is almost Gaussian.

Next, we compared 4 different optimizers on these problems: Adam, SGD (with Momentum), clipped-SGD (with Momentum and coordinate-wise clipping) and clipped-SSTM (with norm-clipping and  $\nu = 1$ ). The results are presented in Fig. 2. We observed that the noise distributions do



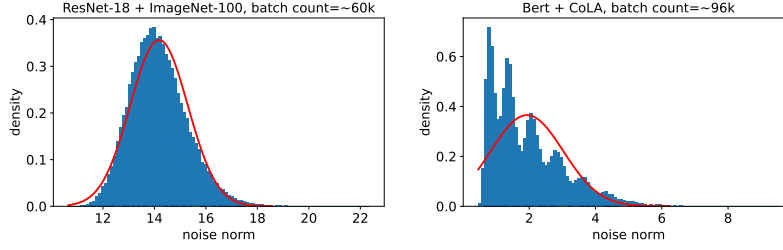

Figure 1: Noise distribution of the stochastic gradients for ResNet-18 on ImageNet-100 and BERT fine-tuning on the CoLA dataset before the training. Red lines: probability density functions with means and variances empirically estimated by the samples. Batch count is the total number of samples used to build a histogram.

251 not change significantly along the trajectories of the considered methods, see Appendix D. During  
 252 the hyper-parameters search we compared different batchsizes, emulated via gradient accumulation  
 253 (thus we compare methods with different batchsizes by the number of base batches used). The base  
 254 batchsize was 32 for both problems, stepsizes and clipping levels were tuned. One can find additional  
 255 details regarding our experiments in Appendix D.

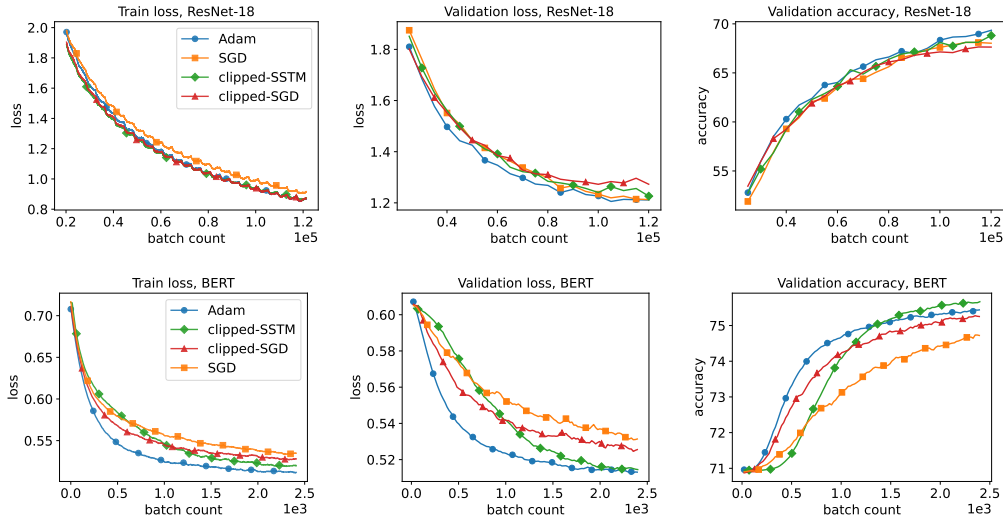

Figure 2: Train and validation loss + accuracy for different optimizers on both problems. Here, “batch count” denotes the total number of used stochastic gradients.

256 **Image classification.** On ResNet-18 + ImageNet-100 task, SGD performs relatively well, and  
 257 even ties with Adam (with batchsize of  $4 \times 32$ ) in validation loss. clipped-SSTM (with batchsize of  
 258  $2 \times 32$ ) also ties with Adam and clipped-SGD is not far from them. The results were averaged from  
 259 5 different launches (with different starting points/weight initializations). Since the noise distribution  
 260 is almost Gaussian even vanilla SGD performs well, i.e., gradient clipping is not required. At the  
 261 same time, the clipping does not slow down the convergence significantly.

262 **Text classification.** On BERT + CoLA task, when the noise distribution is heavy-tailed, the methods  
 263 with clipping outperform SGD by a large margin. This result is in good correspondence with the  
 264 derived high-probability complexity bounds for clipped-SGD, clipped-SSTM and the best-known  
 265 ones for SGD. Moreover, clipped-SSTM (with batchsize of  $8 \times 32$ ) achieves the same loss on  
 266 validation as Adam, and has better accuracy. These results were averaged from 5 different train-val  
 267 splits and 20 launches (with different starting points/weight initializations) for each of the splits, 100  
 268 launches in total.

## References

- [1] George Bennett. Probability inequalities for the sum of independent random variables. *Journal of the American Statistical Association*, 57(297):33–45, 1962.
- [2] Caroline Chaux, Patrick L Combettes, Jean-Christophe Pesquet, and Valérie R Wajs. A variational formulation for frame-based inverse problems. *Inverse Problems*, 23(4):1495–1518, jun 2007.
- [3] Damek Davis, Dmitriy Drusvyatskiy, Lin Xiao, and Junyu Zhang. From low probability to high confidence in stochastic convex optimization. *Journal of Machine Learning Research*, 22(49):1–38, 2021.
- [4] Olivier Devolder. *Exactness, inexactness and stochasticity in first-order methods for large-scale convex optimization*. PhD thesis, PhD thesis, 2013.
- [5] Olivier Devolder, François Glineur, and Yurii Nesterov. First-order methods of smooth convex optimization with inexact oracle. *Mathematical Programming*, 146(1):37–75, 2014.
- [6] Pavel Dvurechensky and Alexander Gasnikov. Stochastic intermediate gradient method for convex problems with stochastic inexact oracle. *Journal of Optimization Theory and Applications*, 171(1):121–145, 2016.
- [7] Kacha Dzhaparidze and JH Van Zanten. On bernstein-type inequalities for martingales. *Stochastic processes and their applications*, 93(1):109–117, 2001.
- [8] David A Freedman et al. On tail probabilities for martingales. *the Annals of Probability*, 3(1):100–118, 1975.
- [9] Alexander Gasnikov and Yurii Nesterov. Universal fast gradient method for stochastic composite optimization problems. *arXiv:1604.05275*, 2016.
- [10] Alexander Vladimirovich Gasnikov, Yu E Nesterov, and Vladimir Grigor’evich Spokoiny. On the efficiency of a randomized mirror descent algorithm in online optimization problems. *Computational Mathematics and Mathematical Physics*, 55(4):580–596, 2015.
- [11] Jonas Gehring, Michael Auli, David Grangier, Denis Yarats, and Yann N Dauphin. Convolutional sequence to sequence learning. In *Proceedings of the 34th International Conference on Machine Learning-Volume 70*, pages 1243–1252. JMLR. org, 2017.
- [12] Saeed Ghadimi and Guanghui Lan. Optimal stochastic approximation algorithms for strongly convex stochastic composite optimization i: A generic algorithmic framework. *SIAM Journal on Optimization*, 22(4):1469–1492, 2012.
- [13] Saeed Ghadimi and Guanghui Lan. Stochastic first-and zeroth-order methods for nonconvex stochastic programming. *SIAM Journal on Optimization*, 23(4):2341–2368, 2013.
- [14] Ian Goodfellow, Yoshua Bengio, and Aaron Courville. *Deep Learning*. MIT Press, 2016. <http://www.deeplearningbook.org>.
- [15] Eduard Gorbunov, Marina Danilova, and Alexander Gasnikov. Stochastic optimization with heavy-tailed noise via accelerated gradient clipping. In H. Larochelle, M. Ranzato, R. Hadsell, M. F. Balcan, and H. Lin, editors, *Advances in Neural Information Processing Systems*, volume 33, pages 15042–15053. Curran Associates, Inc., 2020.
- [16] Robert Mansel Gower, Nicolas Loizou, Xun Qian, Alibek Sailanbayev, Egor Shulgin, and Peter Richtárik. Sgd: General analysis and improved rates. In *International Conference on Machine Learning*, pages 5200–5209, 2019.
- [17] Vincent Guigues, Anatoli Juditsky, and Arkadi Nemirovski. Non-asymptotic confidence bounds for the optimal value of a stochastic program. *Optimization Methods and Software*, 32(5):1033–1058, 2017.
- [18] Cristóbal Guzmán and Arkadi Nemirovski. On lower complexity bounds for large-scale smooth convex optimization. *Journal of Complexity*, 31(1):1–14, 2015.

- [19] Elad Hazan, Kfir Levy, and Shai Shalev-Shwartz. Beyond convexity: Stochastic quasi-convex optimization. In *Advances in Neural Information Processing Systems*, pages 1594–1602, 2015.
- [20] Anatoli Juditsky, Arkadi Nemirovski, et al. First order methods for nonsmooth convex large-scale optimization, i: general purpose methods. *Optimization for Machine Learning*, pages 121–148, 2011.
- [21] Diederik P Kingma and Jimmy Ba. Adam: A method for stochastic optimization. *arXiv preprint arXiv:1412.6980*, 2014.
- [22] Guanghui Lan. An optimal method for stochastic composite optimization. *Mathematical Programming*, 133(1-2):365–397, 2012.
- [23] Vien V Mai and Mikael Johansson. Stability and convergence of stochastic gradient clipping: Beyond lipschitz continuity and smoothness. *arXiv preprint arXiv:2102.06489*, 2021.
- [24] Aditya Krishna Menon, Ankit Singh Rawat, Sashank J Reddi, and Sanjiv Kumar. Can gradient clipping mitigate label noise? In *International Conference on Learning Representations*, 2020.
- [25] Eric Moulines and Francis R Bach. Non-asymptotic analysis of stochastic approximation algorithms for machine learning. In *Advances in Neural Information Processing Systems*, pages 451–459, 2011.
- [26] Aleksandr Viktorovich Nazin, AS Nemirovsky, Aleksandr Borisovich Tsybakov, and AB Juditsky. Algorithms of robust stochastic optimization based on mirror descent method. *Automation and Remote Control*, 80(9):1607–1627, 2019.
- [27] Arkadi Nemirovski, Anatoli Juditsky, Guanghui Lan, and Alexander Shapiro. Robust stochastic approximation approach to stochastic programming. *SIAM Journal on optimization*, 19(4):1574–1609, 2009.
- [28] Arkadi Semenovich Nemirovsky and David Borisovich Yudin. Problem complexity and method efficiency in optimization. 1983.
- [29] Yu Nesterov. Universal gradient methods for convex optimization problems. *Mathematical Programming*, 152(1-2):381–404, 2015.
- [30] Yurii E Nesterov. A method for solving the convex programming problem with convergence rate  $O(1/k^2)$ . In *Dokl. akad. nauk Sssr*, volume 269, pages 543–547, 1983.
- [31] Razvan Pascanu, Tomas Mikolov, and Yoshua Bengio. On the difficulty of training recurrent neural networks. In *International conference on machine learning*, pages 1310–1318, 2013.
- [32] Adam Paszke, Sam Gross, Francisco Massa, Adam Lerer, James Bradbury, Gregory Chanan, Trevor Killeen, Zeming Lin, Natalia Gimelshein, Luca Antiga, Alban Desmaison, Andreas Kopf, Edward Yang, Zachary DeVito, Martin Raison, Alykhan Tejani, Sasank Chilamkurthy, Benoit Steiner, Lu Fang, Junjie Bai, and Soumith Chintala. Pytorch: An imperative style, high-performance deep learning library. In H. Wallach, H. Larochelle, A. Beygelzimer, F. d'Alché-Buc, E. Fox, and R. Garnett, editors, *Advances in Neural Information Processing Systems 32*, pages 8024–8035. Curran Associates, Inc., 2019.
- [33] Herbert Robbins and Sutton Monro. A stochastic approximation method. *The annals of mathematical statistics*, pages 400–407, 1951.
- [34] Olga Russakovsky, Jia Deng, Hao Su, Jonathan Krause, Sanjeev Satheesh, Sean Ma, Zhiheng Huang, Andrej Karpathy, Aditya Khosla, Michael Bernstein, Alexander C. Berg, and Li Fei-Fei. ImageNet Large Scale Visual Recognition Challenge. *International Journal of Computer Vision (IJCV)*, 115(3):211–252, 2015.
- [35] Umut Şimşekli, Mert Gürbüzbalaban, Thanh Huy Nguyen, Gaël Richard, and Levent Sagun. On the heavy-tailed theory of stochastic gradient descent for deep neural networks. *arXiv preprint arXiv:1912.00018*, 2019.
- [36] Umut Simsekli, Levent Sagun, and Mert Gurbuzbalaban. A tail-index analysis of stochastic gradient noise in deep neural networks. *arXiv preprint arXiv:1901.06053*, 2019.

- [37] Vladimir Spokoiny et al. Parametric estimation. finite sample theory. *The Annals of Statistics*, 40(6):2877–2909, 2012.
- [38] Ashish Vaswani, Noam Shazeer, Niki Parmar, Jakob Uszkoreit, Llion Jones, Aidan N Gomez, Łukasz Kaiser, and Illia Polosukhin. Attention is all you need. In *Advances in neural information processing systems*, pages 5998–6008, 2017.
- [39] Alex Warstadt, Amanpreet Singh, and Samuel R Bowman. Neural network acceptability judgments. *arXiv preprint arXiv:1805.12471*, 2018.
- [40] Thomas Wolf, Lysandre Debut, Victor Sanh, Julien Chaumond, Clement Delangue, Anthony Moi, Pierric Cistac, Tim Rault, Rémi Louf, Morgan Funtowicz, Joe Davison, Sam Shleifer, Patrick von Platen, Clara Ma, Yacine Jernite, Julien Plu, Canwen Xu, Teven Le Scao, Sylvain Gugger, Mariama Drame, Quentin Lhoest, and Alexander M. Rush. Transformers: State-of-the-art natural language processing. In *Proceedings of the 2020 Conference on Empirical Methods in Natural Language Processing: System Demonstrations*, pages 38–45, Online, October 2020. Association for Computational Linguistics.
- [41] Jingzhao Zhang, Tianxing He, Suvrit Sra, and Ali Jadbabaie. Why gradient clipping accelerates training: A theoretical justification for adaptivity. In *International Conference on Learning Representations*, 2020.
- [42] Jingzhao Zhang, Sai Praneeth Karimireddy, Andreas Veit, Seungyeon Kim, Sashank Reddi, Sanjiv Kumar, and Suvrit Sra. Why are adaptive methods good for attention models? In H. Larochelle, M. Ranzato, R. Hadsell, M. F. Balcan, and H. Lin, editors, *Advances in Neural Information Processing Systems*, volume 33, pages 15383–15393. Curran Associates, Inc., 2020.

## Checklist

1. For all authors...
  - (a) Do the main claims made in the abstract and introduction accurately reflect the paper’s contributions and scope? [\[Yes\]](#)
  - (b) Did you describe the limitations of your work? [\[Yes\]](#) Section 1.1 describes all assumptions that we use
  - (c) Did you discuss any potential negative societal impacts of your work? [\[No\]](#) Our results are primarily theoretical, therefore, such a discussion is not applicable.
  - (d) Have you read the ethics review guidelines and ensured that your paper conforms to them? [\[Yes\]](#)
2. If you are including theoretical results...
  - (a) Did you state the full set of assumptions of all theoretical results? [\[Yes\]](#) Section 1.1 describes all assumptions that we use.
  - (b) Did you include complete proofs of all theoretical results? [\[Yes\]](#) Appendix B and C include the complete proofs of all the results we derive.
3. If you ran experiments...
  - (a) Did you include the code, data, and instructions needed to reproduce the main experimental results (either in the supplemental material or as a URL)? [\[Yes\]](#) See our code in the supplementary material.
  - (b) Did you specify all the training details (e.g., data splits, hyperparameters, how they were chosen)? [\[Yes\]](#) See Appendix D.
  - (c) Did you report error bars (e.g., with respect to the random seed after running experiments multiple times)? [\[No\]](#) Instead of it, we show the averaged trajectories of the methods’ convergence.
  - (d) Did you include the total amount of compute and the type of resources used (e.g., type of GPUs, internal cluster, or cloud provider)? [\[Yes\]](#) See Appendix D.
4. If you are using existing assets (e.g., code, data, models) or curating/releasing new assets...

- 413 (a) If your work uses existing assets, did you cite the creators? [Yes]  
414 (b) Did you mention the license of the assets? [No] We use only publicly available  
415 resources.  
416 (c) Did you include any new assets either in the supplemental material or as a URL? [No]  
417 (d) Did you discuss whether and how consent was obtained from people whose data you're  
418 using/curating? [No] We use only publicly available resources.  
419 (e) Did you discuss whether the data you are using/curating contains personally identifiable  
420 information or offensive content? [N/A]  
421 5. If you used crowdsourcing or conducted research with human subjects...  
422 (a) Did you include the full text of instructions given to participants and screenshots, if  
423 applicable? [N/A]  
424 (b) Did you describe any potential participant risks, with links to Institutional Review  
425 Board (IRB) approvals, if applicable? [N/A]  
426 (c) Did you include the estimated hourly wage paid to participants and the total amount  
427 spent on participant compensation? [N/A]

## 428 Contents

|     |                                                                                 |           |
|-----|---------------------------------------------------------------------------------|-----------|
| 429 | <b>1 Introduction</b>                                                           | <b>1</b>  |
| 430 | 1.1 Preliminaries . . . . .                                                     | 2         |
| 431 | 1.2 Contributions . . . . .                                                     | 3         |
| 432 | 1.3 Related work . . . . .                                                      | 4         |
| 433 | <b>2 Clipped Stochastic Similar Triangles Method</b>                            | <b>5</b>  |
| 434 | <b>3 SGD with clipping</b>                                                      | <b>7</b>  |
| 435 | <b>4 Numerical experiments</b>                                                  | <b>8</b>  |
| 436 | <b>A Basic facts, technical lemmas, and auxiliary results</b>                   | <b>15</b> |
| 437 | A.1 Notation, missing definitions, and useful inequalities . . . . .            | 15        |
| 438 | A.2 Auxiliary lemmas . . . . .                                                  | 15        |
| 439 | A.3 Technical lemmas . . . . .                                                  | 15        |
| 440 | <b>B Clipped Similar Triangles Method: missing details and proofs</b>           | <b>18</b> |
| 441 | B.1 Convergence in the convex case . . . . .                                    | 18        |
| 442 | B.1.1 Two lemmas . . . . .                                                      | 18        |
| 443 | B.1.2 Proof of Theorem 2.1 . . . . .                                            | 21        |
| 444 | B.1.3 On the batchsizes and numerical constants . . . . .                       | 30        |
| 445 | B.2 Convergence in the strongly convex case . . . . .                           | 32        |
| 446 | <b>C SGD with clipping: missing details and proofs</b>                          | <b>34</b> |
| 447 | C.1 Convex case . . . . .                                                       | 34        |
| 448 | C.2 Strongly convex case . . . . .                                              | 40        |
| 449 | <b>D Additional experimental details</b>                                        | <b>43</b> |
| 450 | D.1 Main experiment hyper-parameters . . . . .                                  | 43        |
| 451 | D.1.1 Image classification . . . . .                                            | 43        |
| 452 | D.1.2 Text classification . . . . .                                             | 43        |
| 453 | D.2 On the relation between stepsize parameter $\alpha$ and batchsize . . . . . | 43        |
| 454 | D.3 Evolution of the noise distribution . . . . .                               | 44        |



## 455 A Basic facts, technical lemmas, and auxiliary results

### 456 A.1 Notation, missing definitions, and useful inequalities

457 **Notation and missing definitions.** We use standard notation for stochastic optimization. For all  
 458  $x \in \mathbb{R}^n$  we use  $\|x\|_2 = \sqrt{\langle x, x \rangle}$  to denote standard Euclidean norm, where  $\langle x, y \rangle = x_1 y_1 + x_2 y_2 +$   
 459  $\dots + x_n y_n$ ,  $x = (x_1, \dots, x_n)^\top$ ,  $x = (x_1, \dots, x_n)^\top \in \mathbb{R}^n$ . Next, we use  $\mathbb{E}[\xi]$  and  $\mathbb{E}[\xi \mid \eta]$  to denote  
 460 expectation of  $\xi$  and expectation of  $\xi$  conditioned on  $\eta$  respectively. In some places of the paper,  
 461 we also use  $\mathbb{E}_\xi[\cdot]$  to denote conditional expectation taken w.r.t. the randomness coming from  $\xi$ . The  
 462 probability of event  $E$  is defined as  $\mathbb{P}\{E\}$ .

463 Finally, we use a standard definition of differentiable strongly convex function.

464 **Definition A.1.** Differentiable function  $f : Q \subseteq \mathbb{R}^n \rightarrow \mathbb{R}$  is called  $\mu$ -strongly convex for some  $\mu \geq 0$   
 465 if for all  $x, y \in Q$

$$f(y) \geq f(x) + \langle \nabla f(x), y - x \rangle + \frac{\mu}{2} \|y - x\|_2^2.$$

466 When  $\mu = 0$  function  $f$  is called convex.

467 **Useful inequalities.** For all  $a, b \in \mathbb{R}^n$  and  $\lambda > 0$

$$|\langle a, b \rangle| \leq \frac{\|a\|_2^2}{2\lambda} + \frac{\lambda \|b\|_2^2}{2}, \quad (10)$$

$$\|a + b\|_2^2 \leq 2\|a\|_2^2 + 2\|b\|_2^2, \quad (11)$$

$$\langle a, b \rangle = \frac{1}{2} (\|a + b\|_2^2 - \|a\|_2^2 - \|b\|_2^2). \quad (12)$$

### 470 A.2 Auxiliary lemmas

471 **Lemma A.1** ([5, 29]). Let  $f$  be  $(\nu, M_\nu)$ -Hölder continuous on  $Q \subseteq \mathbb{R}^n$ . Then for all  $x, y \in Q$  and  
 472 for all  $\delta > 0$

$$f(y) \leq f(x) + \langle \nabla f(x), y - x \rangle + \frac{M_\nu}{1 + \nu} \|x - y\|_2^{1+\nu}, \quad (13)$$

$$f(y) \leq f(x) + \langle \nabla f(x), y - x \rangle + \frac{L(\delta, \nu)}{2} \|x - y\|_2^2 + \frac{\delta}{2}, \quad L(\delta, \nu) = \left(\frac{1}{\delta}\right)^{\frac{1-\nu}{1+\nu}} M_\nu^{\frac{2}{1+\nu}}. \quad (14)$$

474 **Lemma A.2** (Bernstein inequality for martingale differences [1, 7, 8]). Let the sequence of random  
 475 variables  $\{X_i\}_{i \geq 1}$  form a martingale difference sequence, i.e.  $\mathbb{E}[X_i \mid X_{i-1}, \dots, X_1] = 0$  for all  
 476  $i \geq 1$ . Assume that conditional variances  $\sigma_i^2 \stackrel{\text{def}}{=} \mathbb{E}[X_i^2 \mid X_{i-1}, \dots, X_1]$  exist and are bounded and  
 477 assume also that there exists deterministic constant  $c > 0$  such that  $\|X_i\|_2 \leq c$  almost surely for all  
 478  $i \geq 1$ . Then for all  $b > 0$ ,  $F > 0$  and  $n \geq 1$

$$\mathbb{P} \left\{ \left| \sum_{i=1}^n X_i \right| > b \text{ and } \sum_{i=1}^n \sigma_i^2 \leq F \right\} \leq 2 \exp \left( -\frac{b^2}{2F + 2cb/3} \right). \quad (15)$$

### 479 A.3 Technical lemmas

480 **Lemma A.3.** Let sequences  $\{\alpha_k\}_{k \geq 0}$  and  $\{A_k\}_{k \geq 0}$  satisfy

$$\alpha_0 = A_0 = 0, \quad \alpha_{k+1} = \frac{(k+1)^{\frac{2\nu}{1+\nu}} (\varepsilon/2)^{\frac{1-\nu}{1+\nu}}}{2^{\frac{2\nu}{1+\nu}} a M_\nu^{\frac{2}{1+\nu}}}, \quad A_{k+1} = A_k + \alpha_{k+1}, \quad a, \varepsilon, M_\nu > 0, \quad \nu \in [0, 1] \quad (16)$$

481 for all  $k \geq 0$ . Then for all  $k \geq 0$  we have

$$A_k \geq a L_k \alpha_k^2, \quad A_k \geq \frac{k^{\frac{1+3\nu}{1+\nu}} (\varepsilon/2)^{\frac{1-\nu}{1+\nu}}}{2^{\frac{1+3\nu}{1+\nu}} a M_\nu^{\frac{2}{1+\nu}}}, \quad (17)$$

where  $L_0 = 0$  and for  $k > 0$

$$L_k = \left( \frac{2A_k}{\alpha_k \varepsilon} \right)^{\frac{1-\nu}{1+\nu}} M_\nu^{\frac{2}{1+\nu}}. \quad (18)$$

Moreover, for all  $k \geq 0$

$$A_k \leq \frac{k^{\frac{1+3\nu}{1+\nu}} (\varepsilon/2)^{\frac{1-\nu}{1+\nu}}}{2^{\frac{2\nu}{1+\nu}} a M_\nu^{\frac{2}{1+\nu}}}. \quad (19)$$

*Proof.* We start with deriving the second inequality from (17). The proof goes by induction. For  $k = 0$  the inequality holds. Next, we assume that it holds for all  $k \leq K$ . Then,

$$A_{K+1} = A_K + \alpha_{K+1} \geq \frac{K^{\frac{1+3\nu}{1+\nu}} (\varepsilon/2)^{\frac{1-\nu}{1+\nu}}}{2^{\frac{2\nu}{1+\nu}} a M_\nu^{\frac{2}{1+\nu}}} + \frac{(K+1)^{\frac{2\nu}{1+\nu}} (\varepsilon/2)^{\frac{1-\nu}{1+\nu}}}{2^{\frac{2\nu}{1+\nu}} a M_\nu^{\frac{2}{1+\nu}}}.$$

Let us estimate the right-hand side of the previous inequality. We want to show that

$$\frac{K^{\frac{1+3\nu}{1+\nu}} (\varepsilon/2)^{\frac{1-\nu}{1+\nu}}}{2^{\frac{2\nu}{1+\nu}} a M_\nu^{\frac{2}{1+\nu}}} + \frac{(K+1)^{\frac{2\nu}{1+\nu}} (\varepsilon/2)^{\frac{1-\nu}{1+\nu}}}{2^{\frac{2\nu}{1+\nu}} a M_\nu^{\frac{2}{1+\nu}}} \geq \frac{(K+1)^{\frac{1+3\nu}{1+\nu}} (\varepsilon/2)^{\frac{1-\nu}{1+\nu}}}{2^{\frac{2\nu}{1+\nu}} a M_\nu^{\frac{2}{1+\nu}}}$$

that is equivalent to the inequality:

$$\frac{K^{\frac{1+3\nu}{1+\nu}}}{2} + (K+1)^{\frac{2\nu}{1+\nu}} \geq \frac{(K+1)^{\frac{1+3\nu}{1+\nu}}}{2} \iff \frac{K^{\frac{1+3\nu}{1+\nu}}}{2} \geq \frac{(K+1)^{\frac{2\nu}{1+\nu}} (K-1)}{2}.$$

If  $K = 1$ , it trivially holds. If  $K > 1$ , it is equivalent to

$$\frac{K}{K-1} \geq \left( \frac{K+1}{K} \right)^{2 - \frac{2}{1+\nu}}.$$

Since  $2 - \frac{2}{1+\nu}$  is monotonically increasing function for  $\nu \in [0, 1]$  we have that

$$\left( \frac{K+1}{K} \right)^{2 - \frac{2}{1+\nu}} \leq \frac{K+1}{K} \leq \frac{K}{K-1}.$$

That is, the second inequality in (17) holds for  $k = K+1$ , and, as a consequence, it holds for all  $k \geq 0$ . Next, we derive the first part of (17). For  $k = 0$  it trivially holds. For  $k > 0$  we consider cases  $\nu = 0$  and  $\nu > 0$  separately. When  $\nu = 0$  the inequality is equivalent to

$$1 \geq \frac{2a\alpha_k M_0^2}{\varepsilon}, \text{ where } \frac{2a\alpha_k M_0^2}{\varepsilon} \stackrel{(16)}{=} 1,$$

i.e., we have  $A_k = aL_k\alpha_k^2$  for all  $k \geq 0$ . When  $\nu > 0$  the first inequality in (17) is equivalent to

$$A_k \geq a^{\frac{1+\nu}{2\nu}} \alpha_k^{\frac{1+3\nu}{2\nu}} (\varepsilon/2)^{-\frac{1-\nu}{2\nu}} M_\nu^{\frac{1}{2\nu}} \stackrel{(16)}{\iff} A_k \geq \frac{k^{\frac{1+3\nu}{1+\nu}} (\varepsilon/2)^{\frac{1-\nu}{1+\nu}}}{2^{\frac{1+3\nu}{1+\nu}} a M_\nu^{\frac{2}{1+\nu}}},$$

where the last inequality coincides with the second inequality from (17) that we derived earlier in the proof.

To finish the proof it remains to derive (19). Again, the proof goes by induction. For  $k = 0$  inequality (19) is trivial. Next, we assume that it holds for all  $k \leq K$ . Then,

$$A_{K+1} = A_K + \alpha_{K+1} \leq \frac{K^{\frac{1+3\nu}{1+\nu}} (\varepsilon/2)^{\frac{1-\nu}{1+\nu}}}{2^{\frac{2\nu}{1+\nu}} a M_\nu^{\frac{2}{1+\nu}}} + \frac{(K+1)^{\frac{2\nu}{1+\nu}} (\varepsilon/2)^{\frac{1-\nu}{1+\nu}}}{2^{\frac{2\nu}{1+\nu}} a M_\nu^{\frac{2}{1+\nu}}}.$$

Let us estimate the right-hand side of the previous inequality. We want to show that

$$\frac{K^{\frac{1+3\nu}{1+\nu}} (\varepsilon/2)^{\frac{1-\nu}{1+\nu}}}{2^{\frac{2\nu}{1+\nu}} a M_\nu^{\frac{2}{1+\nu}}} + \frac{(K+1)^{\frac{2\nu}{1+\nu}} (\varepsilon/2)^{\frac{1-\nu}{1+\nu}}}{2^{\frac{2\nu}{1+\nu}} a M_\nu^{\frac{2}{1+\nu}}} \leq \frac{(K+1)^{\frac{1+3\nu}{1+\nu}} (\varepsilon/2)^{\frac{1-\nu}{1+\nu}}}{2^{\frac{2\nu}{1+\nu}} a M_\nu^{\frac{2}{1+\nu}}}$$

that is equivalent to the inequality:

$$K^{\frac{1+3\nu}{1+\nu}} + (K+1)^{\frac{2\nu}{1+\nu}} \leq (K+1)^{\frac{1+3\nu}{1+\nu}}.$$

This inequality holds due to

$$K^{\frac{1+3\nu}{1+\nu}} \leq (K+1)^{\frac{2\nu}{1+\nu}} K.$$

That is, (19) holds for  $k = K+1$ , and, as a consequence, it holds for all  $k \geq 0$ .  $\square$

502 **Lemma A.4.** Let  $f$  have Hölder continuous gradients on  $Q \subseteq \mathbb{R}^n$  for some  $\nu \in [0, 1]$  with constant  
 503  $M_\nu > 0$ , be convex and  $x^* \in Q$  be some minimum of  $f(x)$  on  $\mathbb{R}^n$ . Then, for all  $x \in \mathbb{R}^n$

$$\|\nabla f(x)\|_2 \leq \left( \frac{1+\nu}{\nu} \right)^{\frac{\nu}{1+\nu}} M_\nu^{\frac{1}{1+\nu}} (f(x) - f(x^*))^{\frac{\nu}{1+\nu}}, \quad (20)$$

504 where for  $\nu = 0$  we use  $\left[ \left( \frac{1+\nu}{\nu} \right)^{\frac{\nu}{1+\nu}} \right]_{\nu=0} := \lim_{\nu \rightarrow 0} \left( \frac{1+\nu}{\nu} \right)^{\frac{\nu}{1+\nu}} = 1$ .

505 *Proof.* For  $\nu = 0$  inequality (20) follows from (3) and<sup>1</sup>  $\nabla f(x^*) = 0$ . When  $\nu > 0$  for arbitrary point  
 506  $x \in Q$  we consider the point  $y = x - \alpha \nabla f(x)$ , where  $\alpha = \left( \frac{\|\nabla f(x)\|_2^{1-\nu}}{M_\nu} \right)^{\frac{1}{\nu}}$ . Since  $x^* \in Q$  and  $f$  is  
 507 convex one can easily show that  $y \in Q$ . For the pair of points  $x, y$  we apply (13) and get

$$\begin{aligned} f(y) &\leq f(x) + \langle \nabla f(x), y - x \rangle + \frac{M_\nu}{1+\nu} \|x - y\|_2^{1+\nu} \\ &= f(x) - \alpha \|\nabla f(x)\|_2^2 + \frac{\alpha^{\nu+1} M_\nu}{1+\nu} \|\nabla f(x)\|_2^{1+\nu} \\ &= f(x) - \frac{\|\nabla f(x)\|_2^{\frac{1+\nu}{\nu}}}{M_\nu^{\frac{1}{\nu}}} + \frac{\|\nabla f(x)\|_2^{\frac{1+\nu}{\nu}}}{(1+\nu) M_\nu^{\frac{1}{\nu}}} = f(x) - \frac{\nu \|\nabla f(x)\|_2^{\frac{1+\nu}{\nu}}}{(1+\nu) M_\nu^{\frac{1}{\nu}}} \end{aligned}$$

508 implying

$$\|\nabla f(x)\|_2 \leq \left( \frac{1+\nu}{\nu} \right)^{\frac{\nu}{1+\nu}} M_\nu^{\frac{1}{1+\nu}} (f(x) - f(y))^{\frac{\nu}{1+\nu}} \leq \left( \frac{1+\nu}{\nu} \right)^{\frac{\nu}{1+\nu}} M_\nu^{\frac{1}{1+\nu}} (f(x) - f(x^*))^{\frac{\nu}{1+\nu}}.$$

509 □

510 **Lemma A.5.** Let  $f$  have Hölder continuous gradients on  $Q \subseteq \mathbb{R}^n$  for some  $\nu \in [0, 1]$  with constant  
 511  $M_\nu > 0$ , be convex and  $x^* \in Q$  be some minimum of  $f(x)$  on  $\mathbb{R}^n$ . Then, for all  $x \in \mathbb{R}^n$  and all  
 512  $\delta > 0$ ,

$$\|\nabla f(x)\|_2^2 \leq 2 \left( \frac{1}{\delta} \right)^{\frac{1-\nu}{1+\nu}} M_\nu^{\frac{2}{1+\nu}} (f(x) - f(x^*)) + \delta^{\frac{2\nu}{1+\nu}} M_\nu^{\frac{2}{1+\nu}}. \quad (21)$$

513 *Proof.* For a given  $\delta > 0$  we consider an arbitrary point  $x \in Q$  and  $y = x - \frac{1}{L(\delta, \nu)} \nabla f(x)$ , where  
 514  $L(\delta, \nu) = \left( \frac{1}{\delta} \right)^{\frac{1-\nu}{1+\nu}} M_\nu^{\frac{2}{1+\nu}}$ . Since  $x^* \in Q$  and  $f$  is convex one can easily show that  $y \in Q$ . For the  
 515 pair of points  $x, y$  we apply (14) and get

$$\begin{aligned} f(y) &\leq f(x) + \langle \nabla f(x), y - x \rangle + \frac{L(\delta, \nu)}{2} \|x - y\|_2^2 + \frac{\delta}{2} \\ &= f(x) - \frac{1}{2L(\delta, \nu)} \|x - y\|_2^2 + \frac{\delta}{2} \end{aligned}$$

516 implying

$$\begin{aligned} \|\nabla f(x)\|_2^2 &\leq 2L(\delta, \nu) (f(x) - f(y)) + \delta L(\delta, \nu) \\ &\leq 2 \left( \frac{1}{\delta} \right)^{\frac{1-\nu}{1+\nu}} M_\nu^{\frac{2}{1+\nu}} (f(x) - f(x^*)) + \delta^{\frac{2\nu}{1+\nu}} M_\nu^{\frac{2}{1+\nu}}. \end{aligned}$$

517 □

---

<sup>1</sup>When  $f$  is not differentiable, we use subgradients. In this case, 0 belongs to the subdifferential of  $f$  at the point  $x^*$  and we take it as  $\nabla f(x^*)$ .

## 518 B Clipped Similar Triangles Method: missing details and proofs

### 519 B.1 Convergence in the convex case

520 In this section, we provide the full proof of Thm. 2.1 together with complete statement of the result.

#### 521 B.1.1 Two lemmas

522 The analysis of clipped-SSTM consists of 3 main steps. The first one is an “optimization lemma” –  
 523 a modification of a standard lemma for Similar Triangles Method (see [9] and Lemma F.4 from [15]).  
 524 This result helps to estimate the progress of the method after  $N$  iterations.

525 **Lemma B.1.** *Let  $f$  be a convex function with a minimum at some<sup>2</sup> point  $x^*$ , its gradient be  $(\nu, M_\nu)$ -*  
 526 *Hölder continuous on a ball  $B_{3R_0}(x^*)$ , where  $R_0 \geq \|x^0 - x^*\|_2$ , and let stepsize parameter  $a$*   
 527 *satisfy  $a \geq 1$ . If  $x^k, y^k, z^k \in B_{3R_0}(x^*)$  for all  $k = 0, 1, \dots, N$ ,  $N \geq 0$ , then after  $N$  iterations of*  
 528 *clipped-SSTM for all  $z \in \mathbb{R}^n$  we have*

$$\begin{aligned} A_N (f(y^N) - f(z)) &\leq \frac{1}{2} \|z^0 - z\|_2^2 - \frac{1}{2} \|z^N - z\|_2^2 + \sum_{k=0}^{N-1} \alpha_{k+1} \langle \theta_{k+1}, z - z^k \rangle \\ &\quad + \sum_{k=0}^{N-1} \alpha_{k+1}^2 \|\theta_{k+1}\|_2^2 + \sum_{k=0}^{N-1} \alpha_{k+1}^2 \langle \theta_{k+1}, \nabla f(x^{k+1}) \rangle + \frac{A_N \varepsilon}{4} \\ \theta_{k+1} &\stackrel{\text{def}}{=} \tilde{\nabla} f(x^{k+1}, \xi^k) - \nabla f(x^{k+1}). \end{aligned} \quad (23)$$

529 *Proof.* Consider an arbitrary  $k \in \{0, 1, \dots, N-1\}$ . Using  $z^{k+1} = z^k - \alpha_{k+1} \tilde{\nabla} f(x^{k+1}, \xi^k)$  we  
 530 get that for all  $z \in \mathbb{R}^n$

$$\begin{aligned} \alpha_{k+1} \langle \tilde{\nabla} f(x^{k+1}, \xi^k), z^k - z \rangle &= \alpha_{k+1} \langle \tilde{\nabla} f(x^{k+1}, \xi^k), z^k - z^{k+1} \rangle \\ &\quad + \alpha_{k+1} \langle \tilde{\nabla} f(x^{k+1}, \xi^k), z^{k+1} - z \rangle \\ &= \alpha_{k+1} \langle \tilde{\nabla} f(x^{k+1}, \xi^k), z^k - z^{k+1} \rangle + \langle z^{k+1} - z^k, z - z^{k+1} \rangle \\ &\stackrel{(12)}{=} \alpha_{k+1} \langle \tilde{\nabla} f(x^{k+1}, \xi^k), z^k - z^{k+1} \rangle - \frac{1}{2} \|z^k - z^{k+1}\|_2^2 \\ &\quad + \frac{1}{2} \|z^k - z\|_2^2 - \frac{1}{2} \|z^{k+1} - z\|_2^2. \end{aligned} \quad (24)$$

531 Next, we notice that

$$y^{k+1} = \frac{A_k y^k + \alpha_{k+1} z^{k+1}}{A_{k+1}} = \frac{A_k y^k + \alpha_{k+1} z^k}{A_{k+1}} + \frac{\alpha_{k+1}}{A_{k+1}} (z^{k+1} - z^k) = x^{k+1} + \frac{\alpha_{k+1}}{A_{k+1}} (z^{k+1} - z^k) \quad (25)$$

---

<sup>2</sup>Our proofs are valid for any solution  $x^*$  and, for example, one can take as  $x^*$  the closest solution to the starting point  $x^0$ .

532 implying

$$\begin{aligned}
\alpha_{k+1} \left\langle \tilde{\nabla} f(x^{k+1}, \xi^k), z^k - z \right\rangle &\stackrel{(23),(24)}{\leq} \alpha_{k+1} \left\langle \nabla f(x^{k+1}), z^k - z^{k+1} \right\rangle - \frac{1}{2} \|z^k - z^{k+1}\|_2^2 \\
&\quad + \alpha_{k+1} \left\langle \theta_{k+1}, z^k - z^{k+1} \right\rangle + \frac{1}{2} \|z^k - z\|_2^2 - \frac{1}{2} \|z^{k+1} - z\|_2^2 \\
&\stackrel{(25)}{=} A_{k+1} \left\langle \nabla f(x^{k+1}), x^{k+1} - y^{k+1} \right\rangle - \frac{1}{2} \|z^k - z^{k+1}\|_2^2 \\
&\quad + \alpha_{k+1} \left\langle \theta_{k+1}, z^k - z^{k+1} \right\rangle + \frac{1}{2} \|z^k - z\|_2^2 - \frac{1}{2} \|z^{k+1} - z\|_2^2 \\
&\stackrel{(14)}{\leq} A_{k+1} (f(x^{k+1}) - f(y^{k+1})) + \frac{A_{k+1} L_{k+1}}{2} \|x^{k+1} - y^{k+1}\|_2^2 \\
&\quad + \frac{\alpha_{k+1} \varepsilon}{4} - \frac{1}{2} \|z^k - z^{k+1}\|_2^2 + \alpha_{k+1} \left\langle \theta_{k+1}, z^k - z^{k+1} \right\rangle \\
&\quad + \frac{1}{2} \|z^k - z\|_2^2 - \frac{1}{2} \|z^{k+1} - z\|_2^2 \\
&\stackrel{(25)}{=} A_{k+1} (f(x^{k+1}) - f(y^{k+1})) + \frac{1}{2} \left( \frac{\alpha_{k+1}^2 L_{k+1}}{A_{k+1}} - 1 \right) \|z^k - z^{k+1}\|_2^2 \\
&\quad + \alpha_{k+1} \left\langle \theta_{k+1}, z^k - z^{k+1} \right\rangle + \frac{1}{2} \|z^k - z\|_2^2 - \frac{1}{2} \|z^{k+1} - z\|_2^2 + \frac{\alpha_{k+1} \varepsilon}{4},
\end{aligned}$$

533 where in the third inequality we used  $x^{k+1}, y^{k+1} \in B_{3R_0}(x^*)$  and (14) with  $\delta = \frac{\alpha_{k+1}}{2A_{k+1}} \varepsilon$  and  
534  $L(\delta, \nu) = L_{k+1} = \left( \frac{2A_{k+1}}{\varepsilon \alpha_{k+1}} \right)^{\frac{1-\nu}{1+\nu}} M_\nu^{\frac{2}{1+\nu}}$ . Since  $A_{k+1} \geq aL_{k+1}\alpha_{k+1}^2$  (Lemma A.3) and  $a \geq 1$  we  
535 can continue our derivations:

$$\begin{aligned}
\alpha_{k+1} \left\langle \tilde{\nabla} f(x^{k+1}, \xi^k), z^k - z \right\rangle &\leq A_{k+1} (f(x^{k+1}) - f(y^{k+1})) + \alpha_{k+1} \left\langle \theta_{k+1}, z^k - z^{k+1} \right\rangle \\
&\quad + \frac{1}{2} \|z^k - z\|_2^2 - \frac{1}{2} \|z^{k+1} - z\|_2^2 + \frac{\alpha_{k+1} \varepsilon}{4}. \tag{26}
\end{aligned}$$

536 Next, due to convexity of  $f$  we have

$$\begin{aligned}
\left\langle \tilde{\nabla} f(x^{k+1}, \xi^k), y^k - x^{k+1} \right\rangle &\stackrel{(23)}{=} \left\langle \nabla f(x^{k+1}), y^k - x^{k+1} \right\rangle + \left\langle \theta_{k+1}, y^k - x^{k+1} \right\rangle \\
&\leq f(y^k) - f(x^{k+1}) + \left\langle \theta_{k+1}, y^k - x^{k+1} \right\rangle. \tag{27}
\end{aligned}$$

537 By definition of  $x^{k+1}$  we have  $x^{k+1} = \frac{A_k y^k + \alpha_{k+1} z^k}{A_{k+1}}$  implying

$$\alpha_{k+1} (x^{k+1} - z^k) = A_k (y^k - x^{k+1}) \tag{28}$$

538 since  $A_{k+1} = A_k + \alpha_{k+1}$ . Putting all together we derive that

$$\begin{aligned}
\alpha_{k+1} \left\langle \tilde{\nabla} f(x^{k+1}, \xi^k), x^{k+1} - z \right\rangle &= \alpha_{k+1} \left\langle \tilde{\nabla} f(x^{k+1}, \xi^k), x^{k+1} - z^k \right\rangle \\
&\quad + \alpha_{k+1} \left\langle \tilde{\nabla} f(x^{k+1}, \xi^k), z^k - z \right\rangle \\
&\stackrel{(28)}{=} A_k \left\langle \tilde{\nabla} f(x^{k+1}, \xi^k), y^k - x^{k+1} \right\rangle \\
&\quad + \alpha_{k+1} \left\langle \tilde{\nabla} f(x^{k+1}, \xi^k), z^k - z \right\rangle \\
&\stackrel{(27),(26)}{\leq} A_k (f(y^k) - f(x^{k+1})) + A_k \langle \theta_{k+1}, y^k - x^{k+1} \rangle \\
&\quad + A_{k+1} (f(x^{k+1}) - f(y^{k+1})) + \alpha_{k+1} \langle \theta_{k+1}, z^k - z^{k+1} \rangle \\
&\quad + \frac{1}{2} \|z^k - z\|_2^2 - \frac{1}{2} \|z^{k+1} - z\|_2^2 + \frac{\alpha_{k+1}\varepsilon}{4} \\
&\stackrel{(28)}{=} A_k f(y^k) - A_{k+1} f(y^{k+1}) + \alpha_{k+1} \langle \theta_{k+1}, x^{k+1} - z^k \rangle \\
&\quad + \alpha_{k+1} f(x^{k+1}) + \alpha_{k+1} \langle \theta_{k+1}, z^k - z^{k+1} \rangle \\
&\quad + \frac{1}{2} \|z^k - z\|_2^2 - \frac{1}{2} \|z^{k+1} - z\|_2^2 + \frac{\alpha_{k+1}\varepsilon}{4} \\
&= A_k f(y^k) - A_{k+1} f(y^{k+1}) + \alpha_{k+1} f(x^{k+1}) \\
&\quad + \alpha_{k+1} \langle \theta_{k+1}, x^{k+1} - z^{k+1} \rangle \\
&\quad + \frac{1}{2} \|z^k - z\|_2^2 - \frac{1}{2} \|z^{k+1} - z\|_2^2 + \frac{\alpha_{k+1}\varepsilon}{4}.
\end{aligned}$$

539 Rearranging the terms we get

$$\begin{aligned}
A_{k+1} f(y^{k+1}) - A_k f(y^k) &\leq \alpha_{k+1} \left( f(x^{k+1}) + \left\langle \tilde{\nabla} f(x^{k+1}, \xi^k), z - x^{k+1} \right\rangle \right) + \frac{1}{2} \|z^k - z\|_2^2 \\
&\quad - \frac{1}{2} \|z^{k+1} - z\|_2^2 + \alpha_{k+1} \langle \theta_{k+1}, x^{k+1} - z^{k+1} \rangle + \frac{\alpha_{k+1}\varepsilon}{4} \\
&\stackrel{(23)}{=} \alpha_{k+1} (f(x^{k+1}) + \langle \nabla f(x^{k+1}), z - x^{k+1} \rangle) \\
&\quad + \alpha_{k+1} \langle \theta_{k+1}, z - x^{k+1} \rangle + \frac{1}{2} \|z^k - z\|_2^2 - \frac{1}{2} \|z^{k+1} - z\|_2^2 \\
&\quad + \alpha_{k+1} \langle \theta_{k+1}, x^{k+1} - z^{k+1} \rangle + \frac{\alpha_{k+1}\varepsilon}{4} \\
&\leq \alpha_{k+1} f(z) + \frac{1}{2} \|z^k - z\|_2^2 - \frac{1}{2} \|z^{k+1} - z\|_2^2 + \alpha_{k+1} \langle \theta_{k+1}, z - z^{k+1} \rangle + \frac{\alpha_{k+1}\varepsilon}{4}
\end{aligned}$$

540 where in the last inequality we use the convexity of  $f$ . Taking into account  $A_0 = \alpha_0 = 0$  and

541  $A_N = \sum_{k=0}^{N-1} \alpha_{k+1}$  we sum up these inequalities for  $k = 0, \dots, N-1$  and get

$$\begin{aligned}
A_N f(y^N) &\leq A_N f(z) + \frac{1}{2} \|z^0 - z\|_2^2 - \frac{1}{2} \|z^N - z\|_2^2 + \sum_{k=0}^{N-1} \alpha_{k+1} \langle \theta_{k+1}, z - z^{k+1} \rangle + \frac{A_N \varepsilon}{4} \\
&= A_N f(z) + \frac{1}{2} \|z^0 - z\|_2^2 - \frac{1}{2} \|z^N - z\|_2^2 + \sum_{k=0}^{N-1} \alpha_{k+1} \langle \theta_{k+1}, z - z^k \rangle \\
&\quad + \sum_{k=0}^{N-1} \alpha_{k+1}^2 \left\langle \theta_{k+1}, \tilde{\nabla} f(x^{k+1}, \xi^k) \right\rangle + \frac{A_N \varepsilon}{4} \\
&\stackrel{(23)}{=} A_N f(z) + \frac{1}{2} \|z^0 - z\|_2^2 - \frac{1}{2} \|z^N - z\|_2^2 + \sum_{k=0}^{N-1} \alpha_{k+1} \langle \theta_{k+1}, z - z^k \rangle \\
&\quad + \sum_{k=0}^{N-1} \alpha_{k+1}^2 \|\theta_{k+1}\|_2^2 + \sum_{k=0}^{N-1} \alpha_{k+1}^2 \langle \theta_{k+1}, \nabla f(x^{k+1}) \rangle + \frac{A_N \varepsilon}{4}
\end{aligned}$$

542 that concludes the proof.  $\square$



543 From Lemma A.3 we know that

$$A_N \sim \frac{N^{\frac{1+3\nu}{1+\nu}} \varepsilon^{\frac{1-\nu}{1+\nu}}}{M_\nu^{\frac{2}{1+\nu}}}.$$

544 Therefore, in view of Lemma B.1 (inequality (22) with  $z = x^*$ ), to derive the desired complexity  
545 bound from Thm. 2.1 it is sufficient to show that

$$\sum_{k=0}^{N-1} \alpha_{k+1} \langle \theta_{k+1}, z - z^k \rangle + \sum_{k=0}^{N-1} \alpha_{k+1}^2 \|\theta_{k+1}\|_2^2 + \sum_{k=0}^{N-1} \alpha_{k+1}^2 \langle \theta_{k+1}, \nabla f(x^{k+1}) \rangle + \frac{A_N \varepsilon}{4} \lesssim R_0^2.$$

546 with probability at least  $1 - \beta$ . One possible way to achieve this goal is to apply some concentration  
547 inequality to these three sums. Since we use clipped stochastic gradients, under a proper choice of the  
548 clipping parameter, random vector  $\theta_{k+1} = \tilde{\nabla} f(x^{k+1}, \xi^k) - \nabla f(x^{k+1})$  is bounded in  $\ell_2$ -norm by  
549  $2\lambda_{k+1}$  with high probability as well. Taking into account the assumption on the stochastic gradients  
550 (see (2)), it is natural to apply Bernstein's inequality (see Lemma A.2). Despite the seeming simplicity,  
551 this part of the proof is the trickiest one.

552 First of all, it is useful to derive tight enough upper bounds for bias, variance and distortion of  
553  $\tilde{\nabla} f(x^{k+1}, \xi^k)$  – this is the second step of the whole proof. Fortunately, Lemma F.5 from [15] does  
554 exactly what we need in our proof and holds without any changes.

555 **Lemma B.2** (Lemma F.5 from [15]). *For all  $k \geq 0$  the following inequality holds:*

$$\left\| \tilde{\nabla} f(x^{k+1}, \xi^k) - \mathbb{E}_{\xi^k} [\tilde{\nabla} f(x^{k+1}, \xi^k)] \right\|_2 \leq 2\lambda_{k+1}. \quad (29)$$

556 Moreover, if  $\|\nabla f(x^{k+1})\|_2 \leq \frac{\lambda_{k+1}}{2}$  for some  $k \geq 0$ , then for this  $k$  we have:

$$\left\| \mathbb{E}_{\xi^k} [\tilde{\nabla} f(x^{k+1}, \xi^k)] - \nabla f(x^{k+1}) \right\|_2 \leq \frac{4\sigma^2}{m_k \lambda_{k+1}}, \quad (30)$$

$$\mathbb{E}_{\xi^k} \left[ \left\| \tilde{\nabla} f(x^{k+1}, \xi^k) - \nabla f(x^{k+1}) \right\|_2^2 \right] \leq \frac{18\sigma^2}{m_k}, \quad (31)$$

$$\mathbb{E}_{\xi^k} \left[ \left\| \tilde{\nabla} f(x^{k+1}, \xi^k) - \mathbb{E}_{\xi^k} [\tilde{\nabla} f(x^{k+1}, \xi^k)] \right\|_2^2 \right] \leq \frac{18\sigma^2}{m_k}. \quad (32)$$

### 557 B.1.2 Proof of Theorem 2.1

558 The final, third, step of the proof is consists of providing explicit formulas and bounds for the  
559 parameters of the method and derivation of the desired result using induction and Bernstein's  
560 inequality. Below we provide the complete statement of Thm. 2.1.

561 **Theorem B.1.** *Assume that function  $f$  is convex, achieves minimum value at some<sup>3</sup>  $x^*$ , and the  
562 gradients of  $f$  satisfy (3) with  $\nu \in [0, 1]$ ,  $M_\nu > 0$  on  $B_{3R_0}(x^*)$ , where  $R_0 \geq \|x^0 - x^*\|_2$ . Then for  
563 all  $\beta \in (0, 1)$  and  $N \geq 1$  such that*

$$\ln \frac{4N}{\beta} \geq 2 \quad (33)$$

564 we have that after  $N$  iterations of clipped-SSTM with

$$\alpha = \frac{(\varepsilon/2)^{\frac{1-\nu}{1+\nu}}}{2^{\frac{2\nu}{1+\nu}} a M_\nu^{\frac{2}{1+\nu}}}, \quad m_k = \max \left\{ 1, \frac{20736 N \sigma^2 \alpha_{k+1}^2 \ln \frac{4N}{\beta}}{C^2 R_0^2} \right\}, \quad (34)$$

$$B = \frac{C R_0}{16 \ln \frac{4N}{\beta}}, \quad a \geq 16384 \ln^2 \frac{4N}{\beta}, \quad (35)$$

$$\varepsilon^{\frac{1-\nu}{1+\nu}} \leq \frac{a C M_\nu^{\frac{1-\nu}{1+\nu}} R_0^{1-\nu}}{16 \ln \frac{4N}{\beta}}, \quad \varepsilon \leq \frac{2^{\frac{1+\nu}{2}} a^{\frac{1+\nu}{2}} C^{1+\nu} R_0^{1+\nu} M_\nu}{100^{\frac{1+3\nu}{2}}}, \quad (36)$$

<sup>3</sup>Our proofs are valid for any solution  $x^*$  and, for example, one can take as  $x^*$  the closest solution to the starting point  $x^0$ .

567

$$\varepsilon^{\frac{1-\nu}{1+3\nu}} \leq \min \left\{ \frac{a^{\frac{2+3\nu-\nu^2}{2(1+3\nu)}}}{2^{2+4\nu+\frac{3+8\nu-5\nu^2-6\nu^3}{(1+\nu)(1+3\nu)}} \ln \frac{4N}{\beta}}, \frac{a^{\frac{(1+\nu)^2}{1+3\nu}}}{2^{4+7\nu+\frac{2+7\nu+2\nu^2-3\nu^3}{(1+\nu)(1+3\nu)}} \ln^{1+\nu} \frac{4N}{\beta}} \right\} C^{\frac{1-\nu^2}{1+3\nu}} R_0^{\frac{1-\nu^2}{1+3\nu}} M_\nu^{\frac{1-\nu}{1+3\nu}} \quad (37)$$

568 *with probability at least  $1 - \beta$* 

$$f(y^N) - f(x^*) \leq \frac{4aC^2 R_0^2 M_\nu^{\frac{2}{1+\nu}}}{N^{\frac{1+3\nu}{1+\nu}} \varepsilon^{\frac{1-\nu}{1+\nu}}}, \quad (38)$$

569 *where*

$$N = \left\lceil \frac{2^{\frac{1+\nu}{1+3\nu}} a^{\frac{1+\nu}{1+3\nu}} C^{\frac{2(1+\nu)}{1+3\nu}} R_0^{\frac{2(1+\nu)}{1+3\nu}} M_\nu^{\frac{2}{1+3\nu}}}{\varepsilon^{\frac{2}{1+3\nu}}} \right\rceil + 1, \quad C = \sqrt{7}. \quad (39)$$

570 *In other words, if we choose  $a = 16384 \ln^2 \frac{4N}{\beta}$ , then the method achieves  $f(y^N) - f(x^*) \leq \varepsilon$  with*571 *probability at least  $1 - \beta$  after  $O\left(\frac{M_\nu^{\frac{2}{1+3\nu}} R_0^{\frac{2(1+\nu)}{1+3\nu}}}{\varepsilon^{\frac{2}{1+3\nu}}} \ln^{\frac{2(1+\nu)}{1+3\nu}} \frac{M_\nu^{\frac{2}{1+3\nu}} R_0^{\frac{2(1+\nu)}{1+3\nu}}}{\varepsilon^{\frac{2}{1+3\nu}} \beta}\right)$  iterations and requires*

$$O\left(\max \left\{ \frac{M_\nu^{\frac{2}{1+3\nu}} R_0^{\frac{2(1+\nu)}{1+3\nu}}}{\varepsilon^{\frac{2}{1+3\nu}}} \ln^{\frac{2(1+\nu)}{1+3\nu}} \frac{M_\nu^{\frac{2}{1+3\nu}} R_0^{\frac{2(1+\nu)}{1+3\nu}}}{\varepsilon^{\frac{2}{1+3\nu}} \beta}, \frac{\sigma^2 R_0^2}{\varepsilon^2} \ln^{\frac{2(1+\nu)}{1+3\nu}} \frac{M_\nu^{\frac{2}{1+3\nu}} R_0^{\frac{2(1+\nu)}{1+3\nu}}}{\varepsilon^{\frac{2}{1+3\nu}} \beta} \right\}\right) \text{ oracle calls.} \quad (40)$$

572 *Proof.* First of all, we notice that for each  $k \geq 0$  iterates  $x^{k+1}, z^k, y^k$  lie in the ball  $B_{\tilde{R}_k}(x^*)$ , where  
 573  $R_k = \|z^k - x^*\|_2$ ,  $\tilde{R}_0 = R_0$ ,  $\tilde{R}_{k+1} = \max\{\tilde{R}_k, R_{k+1}\}$ . We prove it using induction. Since  $y^0 =$   
 574  $z^0 = x^0$ ,  $\tilde{R}_0 = R_0 \geq \|z^0 - x^*\|_2$  and  $x^1 = \frac{A_0 y^0 + \alpha_1 z^0}{A_1} = z^0$  we have that  $x^1, z^0, y^0 \in B_{\tilde{R}_0}(x^*)$ .  
 575 Next, assume that  $x^l, z^{l-1}, y^{l-1} \in B_{\tilde{R}_{l-1}}(x^*)$  for some  $l \geq 1$ . By definitions of  $R_l$  and  $\tilde{R}_l$  we have  
 576 that  $z^l \in B_{R_l}(x^*) \subseteq B_{\tilde{R}_l}(x^*)$ . Since  $y^l$  is a convex combination of  $y^{l-1} \in B_{\tilde{R}_{l-1}}(x^*) \subseteq B_{\tilde{R}_l}(x^*)$ ,  
 577  $z^l \in B_{\tilde{R}_l}(x^*)$  and  $B_{\tilde{R}_l}(x^*)$  is a convex set we conclude that  $y^l \in B_{\tilde{R}_l}(x^*)$ . Finally, since  $x^{l+1}$  is a  
 578 convex combination of  $y^l$  and  $z^l$  we have that  $x^{l+1}$  lies in  $B_{\tilde{R}_l}(x^*)$  as well.

579 Next, our goal is to prove via induction that for all  $k = 0, 1, \dots, N$  with probability at least  $1 - \frac{k\beta}{N}$   
 580 the following statement holds: inequalities

$$\begin{aligned} R_t^2 &\leq R_0^2 + 2 \sum_{l=0}^{t-1} \alpha_{l+1} \langle \theta_{l+1}, x^* - z^l \rangle + 2 \sum_{l=0}^{t-1} \alpha_{l+1}^2 \langle \theta_{l+1}, \nabla f(x^{l+1}) \rangle \\ &\quad + 2 \sum_{l=0}^{t-1} \alpha_{k+1}^2 \|\theta_{l+1}\|_2^2 + \frac{A_N \varepsilon}{2} \\ &\leq C^2 R_0^2 \end{aligned} \quad (41)$$

581 hold for  $t = 0, 1, \dots, k$  simultaneously where  $C$  is defined in (39). Let  $E_k$  denote the probabilistic  
 582 event that this statement holds. Then, our goal is to show that  $\mathbb{P}\{E_k\} \geq 1 - \frac{k\beta}{N}$  for all  $k = 0, 1, \dots, N$ .  
 583 For  $t = 0$  inequality (41) holds with probability 1 since  $C \geq 1$ , hence  $\mathbb{P}\{E_0\} = 1$ . Next, assume  
 584 that for some  $k = T - 1 \leq N - 1$  we have  $\mathbb{P}\{E_k\} = \mathbb{P}\{E_{T-1}\} \geq 1 - \frac{(T-1)\beta}{N}$ . Let us prove that  
 585  $\mathbb{P}\{E_T\} \geq 1 - \frac{T\beta}{N}$ . First of all, since  $R_{T-1}$  implies  $R_t \leq CR_0$  for all  $t = 0, 1, \dots, T - 1$  we have  
 586 that  $\tilde{R}_{T-1} \leq CR_0$ , and, as a consequence,  $z^{T-1} \in B_{CR_0}(x^*)$ . Therefore, probability event  $E_{T-1}$   
 587 implies

$$\begin{aligned} \|z^T - x^*\|_2 &= \|z^{T-1} - x^* - \alpha_T \tilde{\nabla} f(x^T, \xi^{T-1})\|_2 \leq \|z^{T-1} - x^*\|_2 + \alpha_T \|\tilde{\nabla} f(x^T, \xi^{T-1})\|_2 \\ &\leq CR_0 + \alpha_T \lambda_T = \left(1 + \frac{1}{16 \ln \frac{4N}{\beta}}\right) CR_0 \stackrel{(33), (39)}{\leq} \left(1 + \frac{1}{32}\right) \sqrt{7} R_0 \leq 3R_0, \end{aligned}$$

588 hence  $\tilde{R}_T \leq 3R_0$ . Then, one can apply Lemma B.1 and get that probability event  $E_{T-1}$  implies

$$\begin{aligned}
A_t (f(y^t) - f(x^*)) &\leq \frac{1}{2} \|z^0 - x^*\|_2^2 - \frac{1}{2} \|z^t - x^*\|_2^2 + \sum_{k=0}^{t-1} \alpha_{k+1} \langle \theta_{k+1}, x^* - z^k \rangle \\
&\quad + \sum_{k=0}^{t-1} \alpha_{k+1}^2 \|\theta_{k+1}\|_2^2 + \sum_{k=0}^{t-1} \alpha_{k+1}^2 \langle \theta_{k+1}, \nabla f(x^{k+1}) \rangle + \frac{A_t \varepsilon}{4}, \quad (42) \\
\theta_{k+1} &\stackrel{\text{def}}{=} \tilde{\nabla} f(x^{k+1}, \xi^k) - \nabla f(x^{k+1}) \quad (43)
\end{aligned}$$

589 for all  $t = 0, 1, \dots, T-1, T$ . Taking into account that  $f(y^t) - f(x^*) \geq 0$  for all  $y^t$  we derive that  
590 probability event  $E_{T-1}$  implies

$$R_t^2 \leq R_0^2 + 2 \sum_{l=0}^{t-1} \alpha_{l+1} \langle \theta_{l+1}, x^* - z^l \rangle + 2 \sum_{l=0}^{t-1} \alpha_{l+1}^2 \langle \theta_{l+1}, \nabla f(x^{l+1}) \rangle + 2 \sum_{l=0}^{t-1} \alpha_{l+1}^2 \|\theta_{l+1}\|_2^2 + \frac{A_t \varepsilon}{2}. \quad (44)$$

591 for all  $t = 0, 1, \dots, T$ .

592 The rest of the proof is based on the refined analysis of inequality (44). First of all, when  $\nu = 0$  from  
593 (14) for all  $t \geq 0$  we have

$$\|\nabla f(x^{t+1})\|_2 \leq M_0 = \frac{16M_0 B \ln \frac{4N}{\beta}}{C R_0} \leq \frac{a M_0^2 B}{\varepsilon} = \frac{B}{2\alpha_{t+1}} = \frac{\lambda_{t+1}}{2}$$

594 where we use  $B = \frac{C R_0}{16 \ln \frac{4N}{\beta}}$  and  $\varepsilon \leq \frac{a C M_0 R_0}{16 \ln \frac{4N}{\beta}}$ . Next, we prove that  $\|\nabla f(x^{t+1})\|_2 \leq \frac{\lambda_{t+1}}{2}$  when  
595  $\nu > 0$ . For  $t = 0$  we have

$$\|\nabla f(x^1)\|_2 = \|\nabla f(z^0)\|_2 \stackrel{(3)}{\leq} M_\nu \|z^0 - x^*\|_2^\nu \leq M_\nu R_0^\nu = \frac{16\varepsilon^{\frac{1-\nu}{1+\nu}} \ln \frac{4N}{\beta}}{a C M_\nu^{\frac{1-\nu}{1+\nu}} R_0^{1-\nu}} \leq \frac{B}{2\alpha_1} = \frac{\lambda_1}{2}$$

596 since  $\varepsilon^{\frac{1-\nu}{1+\nu}} \leq \frac{a C M_\nu^{\frac{1-\nu}{1+\nu}} R_0^{1-\nu}}{16 \ln \frac{4N}{\beta}}$ . For  $0 < t \leq T-1$  probability event  $E_{T-1}$  implies

$$\begin{aligned}
\|\nabla f(x^{t+1})\|_2 &\leq \|\nabla f(x^{t+1}) - \nabla f(y^t)\|_2 + \|\nabla f(y^t)\|_2 \\
&\stackrel{(3)}{\leq} M_\nu \|x^{t+1} - y^t\|_2^\nu + \left(\frac{1+\nu}{\nu}\right)^{\frac{\nu}{1+\nu}} M_\nu^{\frac{1}{1+\nu}} (f(y^t) - f(x^*))^{\frac{\nu}{1+\nu}} \\
&\stackrel{(28),(41)}{\leq} M_\nu \left(\frac{\alpha_{t+1}}{A_t}\right)^\nu \|x^{t+1} - z^t\|_2^\nu + \left(\frac{1+\nu}{\nu}\right)^{\frac{\nu}{1+\nu}} M_\nu^{\frac{1}{1+\nu}} \left(\frac{C^2 R_0^2}{2A_t}\right)^{\frac{\nu}{1+\nu}} \\
&= \underbrace{\frac{\lambda_{t+1}}{2} \left(\frac{2M_\nu}{\lambda_{t+1}} \left(\frac{\alpha_{t+1}}{A_t}\right)^\nu \|x^{t+1} - z^t\|_2^\nu\right)}_{D_1} + \underbrace{\left(\frac{1+\nu}{\nu}\right)^{\frac{\nu}{1+\nu}} \frac{2M_\nu^{\frac{1}{1+\nu}}}{\lambda_{t+1}} \left(\frac{C^2 R_0^2}{2A_t}\right)^{\frac{\nu}{1+\nu}}}_{D_2}.
\end{aligned}$$

597 Next, we show that  $D_1 + D_2 \leq 1$ . Using the definition of  $\lambda_{t+1}$ , triangle inequality  $\|x^{t+1} - z^t\|_2 \leq$   
 598  $\|x^{t+1} - x^*\|_2 + \|z^t - x^*\|_2 \leq 2CR_0$ , and lower bound (17) for  $A_t$  (see Lemma A.3) we derive

$$\begin{aligned}
 D_1 &= \frac{2^{\nu+4} M_\nu \alpha_{t+1}^{1+\nu} \ln \frac{4N}{\beta}}{C^{1-\nu} R_0^{1-\nu} A_t^\nu} = \frac{2^{\nu+4} M_\nu (t+1)^{2\nu} (\varepsilon/2)^{1-\nu} \ln \frac{4N}{\beta}}{2^{2\nu} a^{1+\nu} C^{1-\nu} R_0^{1-\nu} M_\nu^2 A_t^\nu} \\
 &\stackrel{(17)}{\leq} \frac{2^3 (t+1)^{2\nu} \varepsilon^{1-\nu} \ln \frac{4N}{\beta}}{a^{1+\nu} C^{1-\nu} R_0^{1-\nu} M_\nu} \cdot \frac{2^{\frac{(1+3\nu)\nu}{1+\nu}} a^\nu M_\nu^{\frac{2\nu}{1+\nu}}}{t^{\frac{(1+3\nu)\nu}{1+\nu}} (\varepsilon/2)^{\frac{\nu(1-\nu)}{1+\nu}}} \\
 &= \frac{(t+1)^{2\nu}}{t^{\frac{\nu(1+3\nu)}{1+\nu}}} \cdot \frac{2^{3+2\nu} \varepsilon^{\frac{1-\nu}{1+\nu}} \ln \frac{4N}{\beta}}{a M_\nu^{\frac{1-\nu}{1+\nu}} C^{1-\nu} R_0^{1-\nu}} \leq \frac{2^{3+4\nu} t^{\frac{\nu(1-\nu)}{1+\nu}} \varepsilon^{\frac{1-\nu}{1+\nu}} \ln \frac{4N}{\beta}}{a M_\nu^{\frac{1-\nu}{1+\nu}} C^{1-\nu} R_0^{1-\nu}} \\
 &\stackrel{(39)}{\leq} \frac{2^{3+4\nu} \varepsilon^{\frac{1-\nu}{1+\nu}} \ln \frac{4N}{\beta}}{a M_\nu^{\frac{1-\nu}{1+\nu}} C^{1-\nu} R_0^{1-\nu}} \cdot \frac{2^{\frac{2\nu(1-\nu)(1+2\nu)}{(1+\nu)(1+3\nu)}} a^{\frac{\nu(1-\nu)}{1+3\nu}} C^{\frac{2\nu(1-\nu)}{1+3\nu}} R_0^{\frac{2\nu(1-\nu)}{1+3\nu}} M_\nu^{\frac{2\nu(1-\nu)}{(1+\nu)(1+3\nu)}}}{\varepsilon^{\frac{2\nu(1-\nu)}{(1+\nu)(1+3\nu)}}} \\
 &= \frac{2^{3+4\nu} + \frac{2\nu(1-\nu)(1+2\nu)}{(1+\nu)(1+3\nu)} \varepsilon^{\frac{1-\nu}{1+3\nu}} \ln \frac{4N}{\beta}}{a^{\frac{(1+\nu)^2}{1+3\nu}} M_\nu^{\frac{1-\nu}{1+3\nu}} C^{\frac{(1-\nu)(1+\nu)}{1+3\nu}} R_0^{\frac{(1-\nu)(1+\nu)}{1+3\nu}}} \stackrel{(37)}{\leq} \frac{1}{2^{\frac{3+6\nu-7\nu^2-2\nu^3}{(1+\nu)(1+3\nu)}} a^{\frac{\nu}{2}}}.
 \end{aligned}$$

599 Applying the same inequalities and  $\left(\frac{1+\nu}{\nu}\right)^{\frac{\nu}{1+\nu}} \leq 2$  we estimate  $D_2$ :

$$\begin{aligned}
 D_2 &= \left(\frac{1+\nu}{\nu}\right)^{\frac{\nu}{1+\nu}} \frac{2^{4-\frac{\nu}{1+\nu}} M_\nu^{\frac{1}{1+\nu}} \alpha_{t+1} \ln \frac{4N}{\beta}}{C^{\frac{1-\nu}{1+\nu}} R_0^{\frac{1-\nu}{1+\nu}} A_t^{\frac{\nu}{1+\nu}}} \leq 2 \cdot \frac{2^{4-\frac{\nu}{1+\nu}} M_\nu^{\frac{1}{1+\nu}} \ln \frac{4N}{\beta}}{C^{\frac{1-\nu}{1+\nu}} R_0^{\frac{1-\nu}{1+\nu}} A_t^{\frac{\nu}{1+\nu}}} \cdot \frac{(t+1)^{\frac{2\nu}{1+\nu}} (\varepsilon/2)^{\frac{1-\nu}{1+\nu}}}{2^{\frac{2\nu}{1+\nu}} a M_\nu^{\frac{2}{1+\nu}}} \\
 &\leq \frac{2^{4-\frac{\nu}{1+\nu}} \cdot 2^{\frac{2\nu}{1+\nu}} t^{\frac{2\nu}{1+\nu}} \varepsilon^{\frac{1-\nu}{1+\nu}} \ln \frac{4N}{\beta}}{a C^{\frac{1-\nu}{1+\nu}} R_0^{\frac{1-\nu}{1+\nu}} M_\nu^{\frac{1}{1+\nu}} A_t^{\frac{\nu}{1+\nu}}} \\
 &\stackrel{(17)}{\leq} \frac{2^{4+\frac{\nu}{1+\nu}} t^{\frac{2\nu}{1+\nu}} \varepsilon^{\frac{1-\nu}{1+\nu}} \ln \frac{4N}{\beta}}{a C^{\frac{1-\nu}{1+\nu}} R_0^{\frac{1-\nu}{1+\nu}} M_\nu^{\frac{1}{1+\nu}}} \cdot \frac{2^{\frac{\nu(1+3\nu)}{(1+\nu)^2}} a^{\frac{\nu}{1+\nu}} M_\nu^{\frac{2\nu}{(1+\nu)^2}}}{t^{\frac{\nu(1+3\nu)}{(1+\nu)^2}} (\varepsilon/2)^{\frac{\nu(1-\nu)}{(1+\nu)^2}}} \\
 &= \frac{2^{4+\frac{3\nu}{1+\nu}} t^{\frac{\nu(1-\nu)}{(1+\nu)^2}} \varepsilon^{\frac{1-\nu}{(1+\nu)^2}} \ln \frac{4N}{\beta}}{a^{\frac{1}{1+\nu}} C^{\frac{1-\nu}{1+\nu}} R_0^{\frac{1-\nu}{1+\nu}} M_\nu^{\frac{1-\nu}{(1+\nu)^2}}} \\
 &\stackrel{(39)}{\leq} \frac{2^{4+\frac{3\nu}{1+\nu}} \varepsilon^{\frac{1-\nu}{(1+\nu)^2}} \ln \frac{4N}{\beta}}{a^{\frac{1}{1+\nu}} C^{\frac{1-\nu}{1+\nu}} R_0^{\frac{1-\nu}{1+\nu}} M_\nu^{\frac{1-\nu}{(1+\nu)^2}}} \cdot \frac{2^{\frac{2\nu(1+2\nu)(1-\nu)}{(1+\nu)^2(1+3\nu)}} a^{\frac{\nu(1-\nu)}{(1+\nu)(1+3\nu)}} C^{\frac{2\nu(1-\nu)}{(1+\nu)(1+3\nu)}} R_0^{\frac{2\nu(1-\nu)}{(1+\nu)(1+3\nu)}} M_\nu^{\frac{2\nu(1-\nu)}{(1+\nu)^2(1+3\nu)}}}{\varepsilon^{\frac{2\nu(1-\nu)}{(1+\nu)^2(1+3\nu)}}} \\
 &= \frac{2^{4+\frac{3\nu}{1+\nu}} + \frac{2\nu(1+2\nu)(1-\nu)}{(1+\nu)^2(1+3\nu)} \varepsilon^{\frac{1-\nu}{(1+\nu)(1+3\nu)}} \ln \frac{4N}{\beta}}{a^{\frac{1+\nu}{1+3\nu}} C^{\frac{1-\nu}{1+3\nu}} R_0^{\frac{1-\nu}{1+3\nu}} M_\nu^{\frac{1-\nu}{(1+\nu)(1+3\nu)}}} \stackrel{(37)}{\leq} \frac{1}{2^{\frac{2+5\nu+\nu^3}{(1+\nu)^2(1+3\nu)}}}.
 \end{aligned}$$

600 Combining the upper bounds for  $D_1$  and  $D_2$  we get

$$D_1 + D_2 \leq \frac{1}{2^{\frac{3+6\nu-7\nu^2-2\nu^3}{(1+\nu)(1+3\nu)}} a^{\frac{\nu}{2}}} + \frac{1}{2^{\frac{2+5\nu+\nu^3}{(1+\nu)^2(1+3\nu)}}}.$$

601 Since  $\frac{2+5\nu+\nu^3}{(1+\nu)^2(1+3\nu)}$  is a decreasing function of  $\nu$  for  $\nu \in [0, 1]$  we continue as

$$D_1 + D_2 \leq \frac{1}{2^{\frac{3+6\nu-7\nu^2-2\nu^3}{(1+\nu)(1+3\nu)}} a^{\frac{\nu}{2}}} + \frac{1}{\sqrt{2}}.$$

602 Next, we use  $a \geq 16384 \ln^2 \frac{4N}{\beta} \geq 2^{10}$  and obtain

$$D_1 + D_2 \leq \frac{1}{2^{\frac{3+11\nu+13\nu^2+13\nu^3}{(1+\nu)(1+3\nu)}}} + \frac{1}{\sqrt{2}}.$$

One can numerically verify that  $\frac{1}{2} \frac{3+11\nu+13\nu^2+13\nu^3}{(1+\nu)(1+3\nu)} + \frac{1}{\sqrt{2}}$  is smaller than 1 for  $\nu \in [0, 1]$ . Putting all together we conclude that probability event  $E_{T-1}$  implies

$$\|\nabla f(x^{t+1})\|_2 \leq \frac{\lambda_{t+1}}{2} \quad (45)$$

for all  $t = 0, 1, \dots, T-1$ . Having inequality (45) in hand we show in the rest of the proof that (41) holds for  $t = T$  with large enough probability. First of all, we introduce new random variables:

$$\eta_l = \begin{cases} x^* - z^l, & \text{if } \|x^* - z^l\|_2 \leq CR_0, \\ 0, & \text{otherwise,} \end{cases} \quad \text{and} \quad \zeta_l = \begin{cases} \nabla f(x^{l+1}), & \text{if } \|\nabla f(x^{l+1})\|_2 \leq \frac{B}{2\alpha_{l+1}}, \\ 0, & \text{otherwise,} \end{cases} \quad (46)$$

for  $l = 0, 1, \dots, T-1$ . Note that these random variables are bounded with probability 1, i.e. with probability 1 we have

$$\|\eta_l\|_2 \leq CR_0 \quad \text{and} \quad \|\zeta_l\|_2 \leq \frac{B}{2\alpha_{l+1}}. \quad (47)$$

Secondly, we use the introduced notation and get that  $E_{T-1}$  implies

$$\begin{aligned} R_T^2 &\stackrel{(44),(41),(45),(46)}{\leq} R_0^2 + 2 \sum_{l=0}^{T-1} \alpha_{l+1} \langle \theta_{l+1}, \eta_l \rangle + 2 \sum_{l=0}^{T-1} \alpha_{l+1}^2 \|\theta_{l+1}\|_2^2 + 2 \sum_{l=0}^{T-1} \alpha_{l+1}^2 \langle \theta_{l+1}, \zeta_l \rangle + \frac{A_N \varepsilon}{2} \\ &= R_0^2 + \sum_{l=0}^{T-1} \alpha_{l+1} \langle \theta_{l+1}, 2\eta_l + 2\alpha_{l+1}\zeta_l \rangle + 2 \sum_{l=0}^{T-1} \alpha_{l+1}^2 \|\theta_{l+1}\|_2^2 + \frac{A_N \varepsilon}{2}. \end{aligned}$$

Finally, we do some preliminaries in order to apply Bernstein's inequality (see Lemma A.2) and obtain that  $E_{T-1}$  implies

$$\begin{aligned} R_T^2 &\stackrel{(11)}{\leq} R_0^2 + \underbrace{\sum_{l=0}^{T-1} \alpha_{l+1} \langle \theta_{l+1}^u, 2\eta_l + 2\alpha_{l+1}\zeta_l \rangle}_{\textcircled{1}} + \underbrace{\sum_{l=0}^{T-1} \alpha_{l+1} \langle \theta_{l+1}^b, 2\eta_l + 2\alpha_{l+1}\zeta_l \rangle}_{\textcircled{2}} \\ &\quad + \underbrace{\sum_{l=0}^{T-1} 4\alpha_{l+1}^2 (\|\theta_{l+1}^u\|_2^2 - \mathbb{E}_{\xi^l} [\|\theta_{l+1}^u\|_2^2])}_{\textcircled{3}} + \underbrace{\sum_{l=0}^{T-1} 4\alpha_{l+1}^2 \mathbb{E}_{\xi^l} [\|\theta_{l+1}^u\|_2^2]}_{\textcircled{4}} \\ &\quad + \underbrace{\sum_{l=0}^{T-1} 4\alpha_{l+1}^2 \|\theta_{l+1}^b\|_2^2 + \frac{A_N \varepsilon}{2}}_{\textcircled{5}} \quad (48) \end{aligned}$$

where we introduce new notations:

$$\theta_{l+1}^u \stackrel{\text{def}}{=} \tilde{\nabla} f(x^{l+1}, \xi^l) - \mathbb{E}_{\xi^l} [\tilde{\nabla} f(x^{l+1}, \xi^l)], \quad \theta_{l+1}^b \stackrel{\text{def}}{=} \mathbb{E}_{\xi^l} [\tilde{\nabla} f(x^{l+1}, \xi^l)] - \nabla f(x^{l+1}), \quad (49)$$

613

$$\theta_{l+1} \stackrel{(23)}{=} \theta_{l+1}^u + \theta_{l+1}^b.$$

It remains to provide tight upper bounds for ①, ②, ③, ④ and ⑤, i.e. in the remaining part of the proof we show that ① + ② + ③ + ④ + ⑤  $\leq \delta C^2 R_0^2$  for some  $\delta < 1$ .

**Upper bound for ①.** First of all, since  $\mathbb{E}_{\xi^l} [\theta_{l+1}^u] = 0$  summands in ① are conditionally unbiased:

$$\mathbb{E}_{\xi^l} [\alpha_{l+1} \langle \theta_{l+1}^u, 2\eta_l + 2\alpha_{l+1}\zeta_l \rangle] = 0.$$

Secondly, these summands are bounded with probability 1:

$$\begin{aligned} |\alpha_{l+1} \langle \theta_{l+1}^u, 2\eta_l + 2\alpha_{l+1}\zeta_l \rangle| &\leq \alpha_{l+1} \|\theta_{l+1}^u\|_2 \|2\eta_l + 2\alpha_{l+1}\zeta_l\|_2 \\ &\stackrel{(29),(47)}{\leq} 2\alpha_{l+1} \lambda_{l+1} (2CR_0 + B) = 2B(2CR_0 + B) \\ &= \left(1 + \frac{1}{32 \ln \frac{4N}{\beta}}\right) \frac{C^2 R_0^2}{4 \ln \frac{4N}{\beta}} \stackrel{(33)}{\leq} \left(1 + \frac{1}{64}\right) \frac{C^2 R_0^2}{4 \ln \frac{4N}{\beta}}. \end{aligned}$$

618 Finally, one can bound conditional variances  $\sigma_l^2 \stackrel{\text{def}}{=} \mathbb{E}_{\xi^l} \left[ \alpha_{l+1}^2 \langle \theta_{l+1}^u, 2\eta_l + 2\alpha_{l+1}\zeta_l \rangle^2 \right]$  in the follow-  
 619 ing way:

$$\begin{aligned}
 \sigma_l^2 &\leq \mathbb{E}_{\xi^l} \left[ \alpha_{l+1}^2 \|\theta_{l+1}^u\|_2^2 \|2\eta_l + 2\alpha_{l+1}\zeta_l\|_2^2 \right] \\
 &\stackrel{(47)}{\leq} \alpha_{l+1}^2 \mathbb{E}_{\xi^l} \left[ \|\theta_{l+1}^u\|_2^2 \right] (2CR_0 + B)^2 = 4\alpha_{l+1}^2 \mathbb{E}_{\xi^l} \left[ \|\theta_{l+1}^u\|_2^2 \right] \left( 1 + \frac{1}{32 \ln \frac{4N}{\beta}} \right)^2 C^2 R_0^2 \\
 &\stackrel{(33)}{\leq} 4\alpha_{l+1}^2 \mathbb{E}_{\xi^l} \left[ \|\theta_{l+1}^u\|_2^2 \right] \left( 1 + \frac{1}{64} \right)^2 C^2 R_0^2.
 \end{aligned} \tag{50}$$

620 In other words, sequence  $\{\alpha_{l+1} \langle \theta_{l+1}^u, 2\eta_l + 2\alpha_{l+1}\zeta_l \rangle\}_{l \geq 0}$  is a bounded martingale difference se-  
 621 quence with bounded conditional variances  $\{\sigma_l^2\}_{l \geq 0}$ . Therefore, we can apply Bernstein's inequal-  
 622 ity, i.e. we apply Lemma A.2 with  $X_l = \alpha_{l+1} \langle \theta_{l+1}^u, 2\eta_l + 2\alpha_{l+1}\zeta_l \rangle$ ,  $c = (1 + \frac{1}{64}) \frac{C^2 R_0^2}{4 \ln \frac{4N}{\beta}}$  and  
 623  $F = \frac{c^2 \ln \frac{4N}{\beta}}{18}$  and get that for all  $b > 0$

$$\mathbb{P} \left\{ \left| \sum_{l=0}^{T-1} X_l \right| > b \text{ and } \sum_{l=0}^{T-1} \sigma_l^2 \leq F \right\} \leq 2 \exp \left( -\frac{b^2}{2F + 2cb/3} \right)$$

624 or, equivalently, with probability at least  $1 - 2 \exp \left( -\frac{b^2}{2F + 2cb/3} \right)$

$$\text{either } \sum_{l=0}^{T-1} \sigma_l^2 > F \quad \text{or} \quad \underbrace{\left| \sum_{l=0}^{T-1} X_l \right|}_{|\mathbb{Q}|} \leq b.$$

625 The choice of  $F$  will be clarified below. Let us now choose  $b$  in such a way that  $2 \exp \left( -\frac{b^2}{2F + 2cb/3} \right) =$   
 626  $\frac{\beta}{2N}$ . This implies that  $b$  is the positive root of the quadratic equation

$$b^2 - \frac{2c \ln \frac{4N}{\beta}}{3} b - 2F \ln \frac{4N}{\beta} = 0,$$

627 hence

$$\begin{aligned}
 b &= \frac{c \ln \frac{4N}{\beta}}{3} + \sqrt{\frac{c^2 \ln^2 \frac{4N}{\beta}}{9} + 2F \ln \frac{4N}{\beta}} \leq \frac{c \ln \frac{4N}{\beta}}{3} + \sqrt{\frac{2c^2 \ln^2 \frac{4N}{\beta}}{9}} \\
 &= \frac{1 + \sqrt{2}}{3} c \ln \frac{4N}{\beta} \leq c \ln \frac{4N}{\beta} = \left( 1 + \frac{1}{64} \right) \frac{C^2 R_0^2}{4} = \left( \frac{1}{4} + \frac{1}{256} \right) C^2 R_0^2.
 \end{aligned}$$

628 That is, with probability at least  $1 - \frac{\beta}{2N}$

$$\underbrace{\text{either } \sum_{l=0}^{T-1} \sigma_l^2 > F \quad \text{or} \quad |\mathbb{Q}| \leq \left( \frac{1}{4} + \frac{1}{256} \right) C^2 R_0^2}_{\text{probability event } E_{\mathbb{Q}}}.$$

629 Next, we notice that probability event  $E_{T-1}$  implies that

$$\begin{aligned}
 \sum_{l=0}^{T-1} \sigma_l^2 &\stackrel{(50)}{\leq} 4 \left( 1 + \frac{1}{64} \right)^2 C^2 R_0^2 \sum_{l=0}^{T-1} \alpha_{l+1}^2 \mathbb{E}_{\xi^l} \left[ \|\theta_{l+1}^u\|_2^2 \right] \\
 &\stackrel{(32),(45)}{\leq} 72 \left( 1 + \frac{1}{64} \right)^2 \sigma^2 C^2 R_0^2 \sum_{l=0}^{T-1} \frac{\alpha_{l+1}^2}{m_l} \\
 &\stackrel{(34)}{\leq} \frac{(1 + \frac{1}{64})^2 C^4 R_0^4}{288 \ln \frac{4N}{\beta}} \sum_{l=0}^{T-1} \frac{1}{N} \\
 &\stackrel{T \leq N}{\leq} \frac{(1 + \frac{1}{64})^2 C^4 R_0^4}{288 \ln \frac{4N}{\beta}} = \frac{c^2 \ln \frac{4N}{\beta}}{18} = F.
 \end{aligned}$$



630 **Upper bound for ②.** The probability event  $E_{T-1}$  implies

$$\begin{aligned}
\alpha_{l+1} \langle \theta_{l+1}^b, 2\eta_l + 2\alpha_{l+1}\zeta_l \rangle &\leq \alpha_{l+1} \|\theta_{l+1}^b\|_2 \|2\eta_l + 2\alpha_{l+1}\zeta_l\|_2 \\
&\stackrel{(30),(47)}{\leq} \alpha_{l+1} \cdot \frac{4\sigma^2}{m_l \lambda_{l+1}} (2CR_0 + B) \\
&= \frac{4\sigma^2 \alpha_{l+1}^2}{m_l} \left(1 + \frac{2CR_0}{B}\right) = \frac{4\sigma^2 \alpha_{l+1}^2}{m_l} \left(1 + 32 \ln \frac{4N}{\beta}\right) \\
&\stackrel{(34)}{\leq} \frac{4 \left(\frac{1}{\ln \frac{4N}{\beta}} + 32\right) C^2 R_0^2}{20736N} \stackrel{(33)}{\leq} \frac{11C^2 R_0^2}{1728N}.
\end{aligned}$$

631 This implies that

$$\textcircled{2} = \sum_{l=0}^{T-1} \alpha_{l+1} \langle \theta_{l+1}^b, 2\eta_l + 2\alpha_{l+1}\zeta_l \rangle \stackrel{T \leq N}{\leq} \frac{11C^2 R_0^2}{1728}.$$

632 **Upper bound for ③.** We derive the upper bound for ③ using the same technique as for ①. First of  
633 all, we notice that the summands in ③ are conditionally unbiased:

$$\mathbb{E}_{\xi^l} [4\alpha_{l+1}^2 (\|\theta_{l+1}^u\|_2^2 - \mathbb{E}_{\xi^l} [\|\theta_{l+1}^u\|_2^2])] = 0.$$

634 Secondly, the summands are bounded with probability 1:

$$\begin{aligned}
|4\alpha_{l+1}^2 (\|\theta_{l+1}^u\|_2^2 - \mathbb{E}_{\xi^l} [\|\theta_{l+1}^u\|_2^2])| &\leq 4\alpha_{l+1}^2 (\|\theta_{l+1}^u\|_2^2 + \mathbb{E}_{\xi^l} [\|\theta_{l+1}^u\|_2^2]) \\
&\stackrel{(29)}{\leq} 4\alpha_{l+1}^2 (4\lambda_{l+1}^2 + 4\lambda_{l+1}^2) \\
&= 32B^2 = \frac{C^2 R_0^2}{8 \ln^2 \frac{4N}{\beta}} \stackrel{(33)}{\leq} \frac{C^2 R_0^2}{16 \ln \frac{4N}{\beta}} \stackrel{\text{def}}{=} c_1. \quad (51)
\end{aligned}$$

635 Finally, one can bound conditional variances  $\hat{\sigma}_l^2 \stackrel{\text{def}}{=} \mathbb{E}_{\xi^l} [4\alpha_{l+1}^2 (\|\theta_{l+1}^u\|_2^2 - \mathbb{E}_{\xi^l} [\|\theta_{l+1}^u\|_2^2])^2]$  in  
636 the following way:

$$\begin{aligned}
\hat{\sigma}_l^2 &\stackrel{(51)}{\leq} c_1 \mathbb{E}_{\xi^l} [4\alpha_{l+1}^2 (\|\theta_{l+1}^u\|_2^2 - \mathbb{E}_{\xi^l} [\|\theta_{l+1}^u\|_2^2])^2] \\
&\leq 4c_1 \alpha_{l+1}^2 \mathbb{E}_{\xi^l} [\|\theta_{l+1}^u\|_2^2 + \mathbb{E}_{\xi^l} [\|\theta_{l+1}^u\|_2^2]] = 8c_1 \alpha_{l+1}^2 \mathbb{E}_{\xi^l} [\|\theta_{l+1}^u\|_2^2]. \quad (52)
\end{aligned}$$

637 In other words, sequence  $\{4\alpha_{l+1}^2 (\|\theta_{l+1}^u\|_2^2 - \mathbb{E}_{\xi^l} [\|\theta_{l+1}^u\|_2^2])\}_{l \geq 0}$  is bounded martingale difference  
638 sequence with bounded conditional variances  $\{\hat{\sigma}_l^2\}_{l \geq 0}$ . Therefore, we can apply Bernstein's inequality,  
639 i.e. we apply Lemma A.2 with  $X_l = \hat{X}_l = 4\alpha_{l+1}^2 (\|\theta_{l+1}^u\|_2^2 - \mathbb{E}_{\xi^l} [\|\theta_{l+1}^u\|_2^2])$ ,  $c = c_1 = \frac{C^2 R_0^2}{16 \ln \frac{4N}{\beta}}$

640 and  $F = F_1 = \frac{c_1 \ln \frac{4N}{\beta}}{18}$  and get that for all  $b > 0$

$$\mathbb{P} \left\{ \left| \sum_{l=0}^{T-1} \hat{X}_l \right| > b \text{ and } \sum_{l=0}^{T-1} \hat{\sigma}_l^2 \leq F_1 \right\} \leq 2 \exp \left( -\frac{b^2}{2F_1 + 2c_1 b/3} \right)$$

641 or, equivalently, with probability at least  $1 - 2 \exp \left( -\frac{b^2}{2F_1 + 2c_1 b/3} \right)$

$$\text{either } \sum_{l=0}^{T-1} \hat{\sigma}_l^2 > F_1 \quad \text{or} \quad \underbrace{\left| \sum_{l=0}^{T-1} \hat{X}_l \right|}_{|\textcircled{3}|} \leq b.$$

642 As in our derivations of the upper bound for ① we choose such  $b$  that  $2 \exp \left( -\frac{b^2}{2F_1 + 2c_1 b/3} \right) = \frac{\beta}{2N}$ ,  
643 i.e.,

$$b = \frac{c_1 \ln \frac{4N}{\beta}}{3} + \sqrt{\frac{c_1^2 \ln^2 \frac{4N}{\beta}}{9} + 2F_1 \ln \frac{4N}{\beta}} \leq \frac{1 + \sqrt{2}}{3} c_1 \ln \frac{4N}{\beta} \leq \frac{C^2 R_0^2}{16}.$$

644 That is, with probability at least  $1 - \frac{\beta}{2N}$

$$\underbrace{\text{either } \sum_{l=0}^{T-1} \hat{\sigma}_l^2 > F_1 \quad \text{or} \quad |\textcircled{3}| \leq \frac{C^2 R_0^2}{16}}_{\text{probability event } E_{\textcircled{3}}}.$$

645 Next, we notice that probability event  $E_{T-1}$  implies that

$$\begin{aligned} \sum_{l=0}^{T-1} \hat{\sigma}_l^2 &\stackrel{(52)}{\leq} 8c_1 \sum_{l=0}^{T-1} \alpha_{l+1}^2 \mathbb{E}_{\xi^l} [\|\theta_{l+1}^u\|_2^2] \\ &\stackrel{(32),(45)}{\leq} \frac{9\sigma^2 C^2 R_0^2}{\ln \frac{4N}{\beta}} \sum_{l=0}^{T-1} \frac{\alpha_{l+1}^2}{m_l} \stackrel{(34)}{\leq} \frac{C^4 R_0^4}{2304 \ln^2 \frac{4N}{\beta}} \sum_{l=0}^{T-1} \frac{1}{N} \\ &\stackrel{T \leq N}{\leq} \frac{C^4 R_0^4}{2304 \ln^2 \frac{4N}{\beta}} \stackrel{(33)}{\leq} \frac{C^4 R_0^4}{4608 \ln \frac{4N}{\beta}} = \frac{c_1^2 \ln \frac{4N}{\beta}}{18} = F_1. \end{aligned}$$

646 **Upper bound for ④.** The probability event  $E_{T-1}$  implies

$$\begin{aligned} \textcircled{4} &= \sum_{l=0}^{T-1} 4\alpha_{l+1}^2 \mathbb{E}_{\xi^l} [\|\theta_{l+1}^u\|_2^2] \stackrel{(32),(45)}{\leq} \sum_{l=0}^{T-1} \frac{72\alpha_{l+1}^2 \sigma^2}{m_l} \stackrel{(34)}{\leq} \sum_{l=0}^{T-1} \frac{C^2 R_0^2}{288N \ln \frac{4N}{\beta}} \\ &\stackrel{T \leq N}{\leq} \frac{C^2 R_0^2}{288 \ln \frac{4N}{\beta}} \stackrel{(33)}{\leq} \frac{C^2 R_0^2}{576}. \end{aligned}$$

647 **Upper bound for ⑤.** Again, we use corollaries of probability event  $E_{T-1}$ :

$$\begin{aligned} \textcircled{5} &= \sum_{l=0}^{T-1} 4\alpha_{l+1}^2 \|\theta_{l+1}^b\|_2^2 \stackrel{(30),(45)}{\leq} \sum_{l=0}^{T-1} \frac{64\alpha_{l+1}^2 \sigma^4}{m_l^2 \lambda_{l+1}^2} = \frac{64\sigma^4}{B^2} \sum_{l=0}^{T-1} \frac{\alpha_{l+1}^4}{m_l^2} \\ &\stackrel{(34),(35)}{\leq} \frac{256 \cdot 64\sigma^4 \ln^2 \frac{4N}{\beta}}{C^2 R_0^2} \sum_{l=0}^{T-1} \frac{C^4 R_0^4}{20736^2 N^2 \sigma^4 \ln^2 \frac{4N}{\beta}} \stackrel{T \leq N}{\leq} \frac{C^2 R_0^2}{26244}. \end{aligned}$$

648 Now we summarize all bounds that we have: probability event  $E_{T-1}$  implies

$$\begin{aligned} R_T^2 &\stackrel{(44)}{\leq} R_0^2 + 2 \sum_{l=0}^{T-1} \alpha_{l+1} \langle \theta_{l+1}, x^* - z^l \rangle + 2 \sum_{l=0}^{k-1} \alpha_{l+1}^2 \langle \theta_{l+1}, \nabla f(x^{l+1}) \rangle + 2 \sum_{l=0}^{T-1} \alpha_{l+1}^2 \|\theta_{l+1}\|_2^2 + \frac{A_N \varepsilon}{2} \\ &\stackrel{(48)}{\leq} R_0^2 + \textcircled{1} + \textcircled{2} + \textcircled{3} + \textcircled{4} + \textcircled{5} + \frac{A_N \varepsilon}{2}, \\ \textcircled{2} &\leq \frac{11C^2 R_0^2}{1728}, \quad \textcircled{4} \leq \frac{CR_0^2}{576}, \quad \textcircled{5} \leq \frac{C^2 R_0^2}{26244}, \\ \sum_{l=0}^{T-1} \sigma_l^2 &\leq F, \quad \sum_{l=0}^{T-1} \hat{\sigma}_l^2 \leq F_1 \end{aligned}$$

649 and

$$\mathbb{P}\{E_{T-1}\} \geq 1 - \frac{(T-1)\beta}{N}, \quad \mathbb{P}\{E_{\textcircled{1}}\} \geq 1 - \frac{\beta}{2N}, \quad \mathbb{P}\{E_{\textcircled{3}}\} \geq 1 - \frac{\beta}{2N},$$

650 where

$$\begin{aligned} E_{\textcircled{1}} &= \left\{ \text{either } \sum_{l=0}^{T-1} \sigma_l^2 > F \quad \text{or} \quad |\textcircled{1}| \leq \left( \frac{1}{4} + \frac{1}{256} \right) C^2 R_0^2 \right\}, \\ E_{\textcircled{3}} &= \left\{ \text{either } \sum_{l=0}^{T-1} \hat{\sigma}_l^2 > F_1 \quad \text{or} \quad |\textcircled{3}| \leq \frac{C^2 R_0^2}{16} \right\}. \end{aligned}$$

Moreover, since  $N \stackrel{(39)}{\leq} \frac{2^{\frac{1+\nu}{1+3\nu}} a^{\frac{1+\nu}{1+3\nu}} C^{\frac{2(1+\nu)}{1+3\nu}} R_0^{\frac{2(1+\nu)}{1+3\nu}} M_\nu^{\frac{2}{1+3\nu}}}{\varepsilon^{\frac{2}{1+3\nu}}} + 1$  and  $\varepsilon \stackrel{(36)}{\leq} \frac{2^{\frac{1+\nu}{2}} a^{\frac{1+\nu}{2}} C^{1+\nu} R_0^{1+\nu} M_\nu}{100^{\frac{1+3\nu}{2}}}$  we have

$$\begin{aligned} \frac{A_N \varepsilon}{2} &\stackrel{(19)}{\leq} \frac{N^{\frac{1+3\nu}{1+\nu}} \varepsilon^{\frac{2}{1+\nu}}}{4aM_\nu^{\frac{2}{1+\nu}}} \stackrel{(39)}{\leq} \left( \frac{2^{\frac{1+\nu}{1+3\nu}} a^{\frac{1+\nu}{1+3\nu}} C^{\frac{2(1+\nu)}{1+3\nu}} R_0^{\frac{2(1+\nu)}{1+3\nu}} M_\nu^{\frac{2}{1+3\nu}}}{\varepsilon^{\frac{2}{1+3\nu}}} + 1 \right)^{\frac{1+3\nu}{1+\nu}} \frac{\varepsilon^{\frac{2}{1+\nu}}}{4aM_\nu^{\frac{2}{1+\nu}}} \\ &\stackrel{(36)}{\leq} \left( \frac{101}{100} \right)^{\frac{1+3\nu}{1+\nu}} \frac{C^2 R_0^2}{2} \leq \frac{10201 C^2 R_0^2}{20000}. \end{aligned}$$

Taking into account these inequalities we get that probability event  $E_{T-1} \cap E_{\textcircled{1}} \cap E_{\textcircled{3}}$  implies

$$\begin{aligned} R_T^2 &\stackrel{(44)}{\leq} R_0^2 + 2 \sum_{l=0}^{T-1} \alpha_{l+1} \langle \theta_{l+1}, x^* - z^l \rangle + 2 \sum_{l=0}^{k-1} \alpha_{l+1}^2 \langle \theta_{l+1}, \nabla f(x^{l+1}) \rangle + 2 \sum_{l=0}^{T-1} \alpha_{l+1}^2 \|\theta_{l+1}\|_2^2 + \frac{A_N \varepsilon}{2} \\ &\leq \left( 1 + \left( \frac{1}{4} + \frac{1}{256} + \frac{11}{1728} + \frac{1}{16} + \frac{1}{576} + \frac{1}{26244} + \frac{10201}{20000} \right) C^2 \right) R_0^2 \\ &\stackrel{(39)}{\leq} C^2 R_0^2. \end{aligned} \tag{53}$$

Moreover, using union bound we derive

$$\mathbb{P}\{E_{T-1} \cap E_{\textcircled{1}} \cap E_{\textcircled{3}}\} = 1 - \mathbb{P}\{\overline{E}_{T-1} \cup \overline{E}_{\textcircled{1}} \cup \overline{E}_{\textcircled{3}}\} \geq 1 - \frac{T\beta}{N}. \tag{54}$$

That is, by definition of  $E_T$  and  $E_{T-1}$  we have proved that

$$\mathbb{P}\{E_T\} \stackrel{(53)}{\geq} \mathbb{P}\{E_{T-1} \cap E_{\textcircled{1}} \cap E_{\textcircled{3}}\} \stackrel{(54)}{\geq} 1 - \frac{T\beta}{N},$$

which implies that for all  $k = 0, 1, \dots, N$  we have  $\mathbb{P}\{E_k\} \geq 1 - \frac{k\beta}{N}$ . Then, for  $k = N$  we have that with probability at least  $1 - \beta$

$$\begin{aligned} A_N (f(y^N) - f(x^*)) &\stackrel{(42)}{\leq} \frac{1}{2} \|z^0 - z\|_2^2 - \frac{1}{2} \|z^N - z\|_2^2 + \sum_{k=0}^{N-1} \alpha_{k+1} \langle \theta_{k+1}, z - z^k \rangle \\ &\quad + \sum_{k=0}^{N-1} \alpha_{k+1}^2 \|\theta_{k+1}\|_2^2 + \sum_{k=0}^{N-1} \alpha_{k+1}^2 \langle \theta_{k+1}, \nabla f(x^{k+1}) \rangle + \frac{A_N \varepsilon}{4} \\ &\stackrel{(41)}{\leq} \frac{C^2 R_0^2}{2}. \end{aligned}$$

Since  $A_N \stackrel{(17)}{\geq} \frac{N^{\frac{1+3\nu}{1+\nu}} (\varepsilon/2)^{\frac{1-\nu}{1+\nu}}}{2^{\frac{1+3\nu}{1+\nu}} a M_\nu^{\frac{2}{1+\nu}}}$  we get that with probability at least  $1 - \beta$

$$f(y^N) - f(x^*) \leq \frac{4aC^2 R_0^2 M_\nu^{\frac{2}{1+\nu}}}{N^{\frac{1+3\nu}{1+\nu}} \varepsilon^{\frac{1-\nu}{1+\nu}}}.$$

659 In other words, clipped-SSTM with  $a = 16384 \ln^2 \frac{4N}{\beta}$  achieves  $f(y^N) - f(x^*) \leq \varepsilon$  with probability  
 660 at least  $1 - \beta$  after  $\mathcal{O}\left(\frac{M_\nu^{\frac{2}{1+3\nu}} R_0^{\frac{2(1+\nu)}{1+3\nu}}}{\varepsilon^{\frac{2}{1+3\nu}}} \ln \frac{2(1+\nu)}{1+3\nu} \frac{M_\nu^{\frac{2}{1+3\nu}} R_0^{\frac{2(1+\nu)}{1+3\nu}}}{\varepsilon^{\frac{2}{1+3\nu}} \beta}\right)$  iterations and requires

$$\begin{aligned}
 \sum_{k=0}^{N-1} m_k &\stackrel{(34)}{=} \sum_{k=0}^{N-1} \mathcal{O}\left(\max\left\{1, \frac{\sigma^2 \alpha_{k+1}^2 N \ln \frac{N}{\beta}}{R_0^2}\right\}\right) \\
 &= \mathcal{O}\left(\max\left\{N, \sum_{k=0}^{N-1} \frac{\sigma^2 (k+1)^{\frac{4\nu}{1+\nu}} \varepsilon^{\frac{2(1-\nu)}{1+\nu}} N \ln \frac{N}{\beta}}{M_\nu^{\frac{4}{1+\nu}} R_0^2 a^2}\right\}\right) \\
 &\stackrel{(35)}{=} \mathcal{O}\left(\max\left\{N, \frac{\sigma^2 \varepsilon^{\frac{2(1-\nu)}{1+\nu}} N^{\frac{2(1+3\nu)}{1+\nu}}}{M_\nu^{\frac{4}{1+\nu}} R_0^2 \ln^3 \frac{N}{\beta}}\right\}\right) \\
 &= \mathcal{O}\left(\max\left\{\frac{M_\nu^{\frac{2}{1+3\nu}} R_0^{\frac{2(1+\nu)}{1+3\nu}}}{\varepsilon^{\frac{2}{1+3\nu}}} \ln \frac{2(1+\nu)}{1+3\nu} \frac{M_\nu^{\frac{2}{1+3\nu}} R_0^{\frac{2(1+\nu)}{1+3\nu}}}{\varepsilon^{\frac{2}{1+3\nu}} \beta}, \frac{\sigma^2 R_0^2}{\varepsilon^2} \ln \frac{M_\nu^{\frac{2}{1+3\nu}} R_0^{\frac{2(1+\nu)}{1+3\nu}}}{\varepsilon^{\frac{2}{1+3\nu}} \beta}\right\}\right).
 \end{aligned}$$

661 oracle calls. □

### 662 B.1.3 On the batchsizes and numerical constants

663 The obtained complexity result is discussed in details in the main part of the paper. Here we discuss  
 664 the choice of the parameters. For convenience, we provide all assumptions from Thm. B.1 on the  
 665 parameters below:

$$666 \quad \ln \frac{4N}{\beta} \geq 2 \tag{55}$$

$$667 \quad \alpha = \frac{(\varepsilon/2)^{\frac{1-\nu}{1+\nu}}}{2^{\frac{2\nu}{1+\nu}} a M_\nu^{\frac{2}{1+\nu}}}, \quad m_k = \max\left\{1, \frac{20736 N \sigma^2 \alpha_{k+1}^2 \ln \frac{4N}{\beta}}{C^2 R_0^2}\right\}, \tag{56}$$

$$668 \quad B = \frac{C R_0}{16 \ln \frac{4N}{\beta}}, \quad a \geq 16384 \ln^2 \frac{4N}{\beta}, \tag{57}$$

$$669 \quad \varepsilon^{\frac{1-\nu}{1+\nu}} \leq \frac{a C M_\nu^{\frac{1-\nu}{1+\nu}} R_0^{1-\nu}}{16 \ln \frac{4N}{\beta}}, \quad \varepsilon \leq \frac{2^{\frac{1+\nu}{2}} a^{\frac{1+\nu}{2}} C^{1+\nu} R_0^{1+\nu} M_\nu}{100^{\frac{1+3\nu}{2}}}, \tag{58}$$

$$670 \quad \varepsilon^{\frac{1-\nu}{1+3\nu}} \leq \min\left\{\frac{a^{\frac{2+3\nu-\nu^2}{2(1+3\nu)}}}{2^{2+4\nu+\frac{3+8\nu-5\nu^2-6\nu^3}{(1+\nu)(1+3\nu)}} \ln \frac{4N}{\beta}, \frac{a^{\frac{(1+\nu)^2}{1+3\nu}}}{2^{4+7\nu+\frac{2+7\nu+2\nu^2-3\nu^3}{(1+\nu)(1+3\nu)}} \ln^{1+\nu} \frac{4N}{\beta}}\right\} C^{\frac{1-\nu^2}{1+3\nu}} R_0^{\frac{1-\nu^2}{1+3\nu}} M_\nu^{\frac{1-\nu}{1+3\nu}} \tag{59}$$

$$671 \quad N = \left\lceil \frac{2^{\frac{1+\nu}{1+3\nu}} a^{\frac{1+\nu}{1+3\nu}} C^{\frac{2(1+\nu)}{1+3\nu}} R_0^{\frac{2(1+\nu)}{1+3\nu}} M_\nu^{\frac{2}{1+3\nu}}}{\varepsilon^{\frac{2}{1+3\nu}}} \right\rceil + 1, \quad C = \sqrt{7}. \tag{60}$$

671 We emphasize that (55), (58), and (59) are not restrictive at all since the target accuracy  $\varepsilon$  and  
 672 confidence level  $\beta$  are often chosen to be small enough, whereas  $a$  can be made large enough.

673 Next, one can notice that the assumptions on parameter  $a$  and batchsize  $m_k$  contain huge numerical  
 674 constants (see (56)-(57)) that results in large numerical constants in the expression for the number  
 675 of iterations  $N$  and the total number of oracle calls required to guarantee accuracy  $\varepsilon$  of the solution.  
 676 However, for the sake of simplicity of the proofs, we do not try to provide an analysis with optimal  
 677 or near-optimal dependence on the numerical constants. Moreover, the main goal in this paper is to  
 678 derive improved high-probability complexity guarantees in terms of  $\mathcal{O}(\cdot)$ -notation – such guarantees  
 679 are insensitive to numerical constants by definition.

Finally, (56) implies that the batchsize at iteration  $k$  is

$$m_k = \Theta \left( \max \left\{ 1, \frac{N\sigma^2(k+1)^{\frac{4\nu}{1+\nu}} \varepsilon^{\frac{2(1-\nu)}{1+\nu}} \ln \frac{N}{\beta}}{a^2 M_\nu^{\frac{4}{1+\nu}} R_0^2} \right\} \right)$$

meaning that for  $k \sim N$  and  $a = \mathcal{O} \left( \ln^2 \frac{N}{\beta} \right)$  we have that the second term in the maximum is proportional to  $N^{\frac{1+5\nu}{1+\nu}} \varepsilon^{\frac{2(1-\nu)}{1+\nu}}$ . When  $\nu$  is close to 1 and  $\sigma^2 \gg 0$  it implies that  $m_k$  is huge for big enough  $k$  making the method completely impractical. Fortunately, this issue can be easily solved without sacrificing the oracle complexity of the method: it is sufficient to choose large enough  $a$ .

**Corollary B.1.** *Let the assumptions of Thm. B.1 hold and*

$$a = \max \left\{ 16384 \ln^2 \frac{4N}{\beta}, \frac{5184^{\frac{1+3\nu}{1+\nu}} \cdot 2^{\frac{2(1+5\nu)(1+2\nu)}{(1+\nu)^2}} \sigma^{\frac{2(1+3\nu)}{1+\nu}} C^{\frac{4\nu}{1+\nu}} R_0^{\frac{4\nu}{1+\nu}} \ln^{\frac{1+3\nu}{1+\nu}} \frac{4N}{\beta}}{M_\nu^{\frac{2}{1+\nu}} \varepsilon^{\frac{6\nu}{1+\nu}}} \right\}. \quad (61)$$

Then for all  $k = 0, 1, \dots, N-1$  we have  $m_k = 1$  and to achieve  $f(y^N) - f(x^*) \leq \varepsilon$  with probability at least  $1 - \beta$  clipped-SSTM requires

$$\mathcal{O} \left( \max \left\{ \frac{M_\nu^{\frac{2}{1+3\nu}} R_0^{\frac{2(1+\nu)}{1+3\nu}}}{\varepsilon^{\frac{2}{1+3\nu}}} \ln^{\frac{2(1+\nu)}{1+3\nu}} \frac{M_\nu^{\frac{2}{1+3\nu}} R_0^{\frac{2(1+\nu)}{1+3\nu}}}{\varepsilon^{\frac{2}{1+3\nu}} \beta}, \frac{\sigma^2 R_0^2}{\varepsilon^2} \ln^{\frac{\sigma^2 R_0^2}{\varepsilon^2 \beta}} \right\} \right) \quad (62)$$

iterations/oracle calls.

*Proof.* We start with showing that for the new choice of  $a$  we have  $m_k = 1$  for all  $k = 0, 1, \dots, N-1$ . Indeed, using the assumptions on the parameters from Thm. B.1 we derive

$$\begin{aligned} m_k &= \max \left\{ 1, \frac{20736 N \sigma^2 \alpha_{k+1}^2 \ln \frac{4N}{\beta}}{C^2 R_0^2} \right\} = \max \left\{ 1, \frac{5184 N \sigma^2 (k+1)^{\frac{4\nu}{1+\nu}} \varepsilon^{\frac{2(1-\nu)}{1+\nu}}}{a^2 M_\nu^{\frac{4}{1+\nu}} C^2 R_0^2} \right\} \\ &\stackrel{k < N}{\leq} \max \left\{ 1, \frac{5184 \sigma^2 N^{\frac{1+5\nu}{1+\nu}} \varepsilon^{\frac{2(1-\nu)}{1+\nu}}}{a^2 M_\nu^{\frac{4}{1+\nu}} C^2 R_0^2} \right\} \\ &\stackrel{(39)}{\leq} \max \left\{ 1, \frac{5184 \cdot 2^{\frac{2(1+5\nu)(1+2\nu)}{(1+\nu)(1+3\nu)}} \sigma^2 C^{\frac{4\nu}{1+3\nu}} R_0^{\frac{4\nu}{1+3\nu}} \ln \frac{4N}{\beta}}{a^{\frac{1+\nu}{1+3\nu}} M_\nu^{\frac{2}{1+3\nu}} \varepsilon^{\frac{6\nu}{1+3\nu}}} \right\} \stackrel{(61)}{\leq} 1. \end{aligned}$$

That is, with the choice of the stepsize parameter  $a$  as in (61) the method uses unit batchsizes at each iteration. Therefore, iteration and oracle complexities coincide in this case. Next, we consider two possible situations.

1. If  $a = 16384 \ln^2 \frac{4N}{\beta}$ , then

$$\begin{aligned} N &\stackrel{(39)}{=} \left\lceil \frac{2^{\frac{1+\nu}{1+3\nu}} a^{\frac{1+\nu}{1+3\nu}} C^{\frac{2(1+\nu)}{1+3\nu}} R_0^{\frac{2(1+\nu)}{1+3\nu}} M_\nu^{\frac{2}{1+3\nu}}}{\varepsilon^{\frac{2}{1+3\nu}}} \right\rceil + 1 = \mathcal{O} \left( \frac{M_\nu^{\frac{2}{1+3\nu}} R_0^{\frac{2(1+\nu)}{1+3\nu}}}{\varepsilon^{\frac{2}{1+3\nu}}} \ln^{\frac{2(1+\nu)}{1+3\nu}} \frac{N}{\beta} \right) \\ &= \mathcal{O} \left( \frac{M_\nu^{\frac{2}{1+3\nu}} R_0^{\frac{2(1+\nu)}{1+3\nu}}}{\varepsilon^{\frac{2}{1+3\nu}}} \ln^{\frac{2(1+\nu)}{1+3\nu}} \frac{M_\nu^{\frac{2}{1+3\nu}} R_0^{\frac{2(1+\nu)}{1+3\nu}}}{\varepsilon^{\frac{2}{1+3\nu}} \beta} \right). \end{aligned}$$

2. If  $a = \frac{5184^{\frac{1+3\nu}{1+\nu}} \cdot 2^{\frac{2(1+5\nu)(1+2\nu)}{(1+\nu)^2}} \sigma^{\frac{2(1+3\nu)}{1+\nu}} C^{\frac{4\nu}{1+\nu}} R_0^{\frac{4\nu}{1+\nu}} \ln^{\frac{1+3\nu}{1+\nu}} \frac{4N}{\beta}}{M_\nu^{\frac{2}{1+\nu}} \varepsilon^{\frac{6\nu}{1+\nu}}}$ , then

$$\begin{aligned} N &\stackrel{(39)}{=} \left\lceil \frac{2^{\frac{1+\nu}{1+3\nu}} a^{\frac{1+\nu}{1+3\nu}} C^{\frac{2(1+\nu)}{1+3\nu}} R_0^{\frac{2(1+\nu)}{1+3\nu}} M_\nu^{\frac{2}{1+3\nu}}}{\varepsilon^{\frac{2}{1+3\nu}}} \right\rceil + 1 \\ &= \mathcal{O} \left( \frac{M_\nu^{\frac{2}{1+3\nu}} R_0^{\frac{2(1+\nu)}{1+3\nu}}}{\varepsilon^{\frac{2}{1+3\nu}}} \cdot \frac{\sigma^2 R_0^{\frac{4\nu}{1+3\nu}} \ln \frac{4N}{\beta}}{M_\nu^{\frac{2}{1+3\nu}} \varepsilon^{\frac{6\nu}{1+3\nu}}} \right) = \mathcal{O} \left( \frac{\sigma^2 R_0^2}{\varepsilon^2} \ln^{\frac{\sigma^2 R_0^2}{\varepsilon^2 \beta}} \right). \end{aligned}$$

Putting all together we derive (62).  $\square$

## B.2 Convergence in the strongly convex case

In this section, we provide the full proof of Thm. 2.2 together with complete statement of the result. Note that due to strong convexity the solution  $x^*$  is unique.

**Theorem B.2.** Assume that function  $f$  is  $\mu$ -strongly convex and its gradients satisfy (3) with  $\nu \in [0, 1]$ ,  $M_\nu > 0$  on  $Q = B_{3R_0} = \{x \in \mathbb{R}^n \mid \|x - x^*\|_2 \leq 3R_0\}$ , where  $R_0 \geq \|x^0 - x^*\|_2$ . Let  $\varepsilon > 0$ ,  $\beta \in (0, 1)$  and for  $t = 1, \dots, \tau$

$$N_t = \left\lceil \frac{2^{\frac{1+\nu}{1+3\nu}} a_t^{\frac{1+\nu}{1+3\nu}} C^{\frac{2(1+\nu)}{1+3\nu}} R_0^{\frac{2(1+\nu)}{1+3\nu}} M_\nu^{\frac{2}{1+3\nu}}}{2^{\frac{(1+\nu)(t-1)}{1+3\nu}} \varepsilon_t^{\frac{2}{1+3\nu}}} \right\rceil + 1, \quad \varepsilon_t = \frac{\mu R_0^2}{2^{t+1}}, \quad (63)$$

$$\tau = \left\lceil \log_2 \frac{\mu R_0}{2\varepsilon} \right\rceil, \quad \ln \frac{4N_t\tau}{\beta} \geq 2, \quad C = \sqrt{7}, \quad (64)$$

$$\alpha^t = \frac{(\varepsilon_t/2)^{\frac{1-\nu}{1+\nu}}}{2^{\frac{2\nu}{1+\nu}} a_t M_\nu^{\frac{2}{1+\nu}}}, \quad m_k^t = \max \left\{ 1, \frac{20736 \cdot 2^{t-1} N_t \sigma^2 (\alpha_{k+1}^t)^2 \ln \frac{4N_t\tau}{\beta}}{C^2 R_0^2} \right\}, \quad (65)$$

$$\alpha_{k+1}^t = \alpha^t (k+1)^{\frac{2\nu}{1+\nu}}, \quad B = \frac{C R_0}{16 \ln \frac{4N_t\tau}{\beta}}, \quad a_t = 16384 \ln^2 \frac{4N_t\tau}{\beta}, \quad (66)$$

$$\varepsilon_t^{\frac{1-\nu}{1+\nu}} \leq \frac{a_t C M_\nu^{\frac{1-\nu}{1+\nu}} R_0^{1-\nu}}{16 \cdot 2^{\frac{(1-\nu)(t-1)}{2}} \ln \frac{4N_t\tau}{\beta}}, \quad \varepsilon_t \leq \frac{2^{\frac{1+\nu}{2}} a_t^{\frac{1+\nu}{2}} C^{1+\nu} R_0^{1+\nu} M_\nu}{100^{\frac{1+3\nu}{2}} \cdot 2^{\frac{(1+\nu)(t-1)}{2}}}, \quad (67)$$

$$\varepsilon_t^{\frac{1-\nu}{1+\nu}} \leq \min \left\{ \frac{a_t^{\frac{2+3\nu-\nu^2}{2(1+3\nu)}}}{2^{2+4\nu+\frac{3+8\nu-5\nu^2-6\nu^3}{(1+\nu)(1+3\nu)}} \ln \frac{4N_t\tau}{\beta}}, \frac{a_t^{\frac{(1+\nu)^2}{1+3\nu}}}{2^{4+7\nu+\frac{2+7\nu+2\nu^2-3\nu^3}{(1+\nu)(1+3\nu)}} \ln^{1+\nu} \frac{4N_t\tau}{\beta}} \right\} \frac{C^{\frac{1-\nu^2}{1+3\nu}} R_0^{\frac{1-\nu^2}{1+3\nu}} M_\nu^{\frac{1-\nu}{1+3\nu}}}{2^{\frac{(1-\nu^2)(t-1)}{2(1+3\nu)}}}. \quad (68)$$

Then, after  $\tau$  restarts R-clipped-SSTM produces  $\hat{x}^\tau$  such that with probability at least  $1 - \beta$

$$f(\hat{x}^\tau) - f(x^*) \leq \varepsilon. \quad (69)$$

That is, to achieve (69) with probability at least  $1 - \beta$  the method requires

$$\hat{N} = \mathcal{O} \left( \max \left\{ \left( \frac{M_\nu}{\mu R_0^{1-\nu}} \right)^{\frac{2}{1+3\nu}} \ln \frac{\mu R_0^2}{\varepsilon}, \left( \frac{M_\nu^2}{\mu^{1+\nu} \varepsilon^{1-\nu}} \right)^{\frac{1}{1+3\nu}} \right\} \ln^{\frac{2(1+\nu)}{1+3\nu}} \frac{M_\nu^{\frac{2}{1+3\nu}} \ln \frac{\mu R_0^2}{\varepsilon}}{\mu^{\frac{1+\nu}{1+3\nu}} \varepsilon^{\frac{1-\nu}{1+3\nu}} \beta} \right) \quad (70)$$

iterations of Alg. 1 and

$$\mathcal{O} \left( \max \left\{ \hat{N}, \frac{\sigma^2}{\mu \varepsilon} \ln \frac{M_\nu^{\frac{2}{1+3\nu}} \ln \frac{\mu R_0^2}{\varepsilon}}{\mu^{\frac{1+\nu}{1+3\nu}} \varepsilon^{\frac{1-\nu}{1+3\nu}} \beta} \right\} \right) \text{ oracle calls.} \quad (71)$$

*Proof.* Applying Thm. B.1, we obtain that with probability at least  $1 - \frac{\beta}{\tau}$

$$f(\hat{x}^1) - f(x^*) \leq \frac{\mu R_0^2}{4}.$$

Since  $f$  is  $\mu$ -strongly convex we have

$$\frac{\mu \|\hat{x}^1 - x^*\|_2^2}{2} \leq f(\hat{x}^1) - f(x^*).$$

Therefore, with probability at least  $1 - \frac{\beta}{\tau}$

$$f(\hat{x}^1) - f(x^*) \leq \frac{\mu R_0^2}{4}, \quad \|\hat{x}^1 - x^*\|_2^2 \leq \frac{R_0^2}{2}.$$



714 From mathematical induction and the union bound for probability events it follows that inequalities

$$f(\hat{x}^t) - f(x^*) \leq \frac{\mu R_0^2}{2^{t+1}}, \quad \|\hat{x}^t - x^*\|_2^2 \leq \frac{R_0^2}{2^t}$$

715 hold simultaneously for  $t = 1, \dots, \tau$  with probability at least  $1 - \beta$ . In particular, it means that after

716  $\tau = \left\lceil \log_2 \frac{\mu R_0^2}{\varepsilon} \right\rceil - 1$  restarts **R-clipped-SSTM** finds an  $\varepsilon$ -solution with probability at least  $1 - \beta$ .

717 The total number of iterations  $\hat{N}$  is

$$\begin{aligned} \sum_{t=1}^{\tau} N_t &= \mathcal{O} \left( \sum_{t=1}^{\tau} \frac{M_{\nu}^{\frac{2}{1+3\nu}} R_0^{\frac{2(1+\nu)}{1+3\nu}}}{2^{\frac{(1+\nu)t}{1+3\nu}} \varepsilon_t^{\frac{2}{1+3\nu}}} \ln \frac{2^{(1+\nu)} M_{\nu}^{\frac{2}{1+3\nu}} R_0^{\frac{2(1+\nu)}{1+3\nu}} \tau}{2^{\frac{(1+\nu)t}{1+3\nu}} \varepsilon_t^{\frac{2}{1+3\nu}} \beta} \right) \\ &= \mathcal{O} \left( \sum_{t=1}^{\tau} \frac{M_{\nu}^{\frac{2}{1+3\nu}} R_0^{\frac{2(1+\nu)}{1+3\nu}} 2^{\frac{2t}{1+3\nu}}}{2^{\frac{(1+\nu)t}{1+3\nu}} \mu^{\frac{2}{1+3\nu}} R_0^{\frac{4}{1+3\nu}}} \ln \frac{2^{(1+\nu)} M_{\nu}^{\frac{2}{1+3\nu}} R_0^{\frac{2(1+\nu)}{1+3\nu}} 2^{\frac{2t}{1+3\nu}} \tau}{2^{\frac{(1+\nu)t}{1+3\nu}} \mu^{\frac{2}{1+3\nu}} R_0^{\frac{4}{1+3\nu}} \beta} \right) \\ &= \mathcal{O} \left( \sum_{t=1}^{\tau} \frac{M_{\nu}^{\frac{2}{1+3\nu}} 2^{\frac{(1-\nu)t}{1+3\nu}}}{\mu^{\frac{2}{1+3\nu}} R_0^{\frac{2(1-\nu)}{1+3\nu}}} \ln \frac{2^{(1+\nu)} M_{\nu}^{\frac{2}{1+3\nu}} 2^{\frac{(1-\nu)t}{1+3\nu}} \tau}{\mu^{\frac{2}{1+3\nu}} R_0^{\frac{2(1-\nu)}{1+3\nu}} \beta} \right) \\ &= \mathcal{O} \left( \frac{M_{\nu}^{\frac{2}{1+3\nu}} \max \left\{ \tau, 2^{\frac{(1-\nu)\tau}{1+3\nu}} \right\}}{\mu^{\frac{2}{1+3\nu}} R_0^{\frac{2(1-\nu)}{1+3\nu}}} \ln \frac{2^{(1+\nu)} M_{\nu}^{\frac{2}{1+3\nu}} 2^{\frac{(1-\nu)\tau}{1+3\nu}} \tau}{\mu^{\frac{2}{1+3\nu}} R_0^{\frac{2(1-\nu)}{1+3\nu}} \beta} \right) \\ &= \mathcal{O} \left( \max \left\{ \left( \frac{M_{\nu}}{\mu R_0^{1-\nu}} \right)^{\frac{2}{1+3\nu}} \ln \frac{\mu R_0^2}{\varepsilon}, \left( \frac{M_{\nu}^2}{\mu^{1+\nu} \varepsilon^{1-\nu}} \right)^{\frac{1}{1+3\nu}} \right\} \ln \frac{2^{(1+\nu)} M_{\nu}^{\frac{2}{1+3\nu}} \ln \frac{\mu R_0^2}{\varepsilon}}{\mu^{\frac{1+\nu}{1+3\nu}} \varepsilon^{\frac{1-\nu}{1+3\nu}} \beta} \right), \end{aligned}$$

718 and the total number of oracle calls equals

$$\begin{aligned} \sum_{t=1}^{\tau} \sum_{k=0}^{N_t-1} m_k^t &= \mathcal{O} \left( \max \left\{ \sum_{t=1}^{\tau} N_t, \sum_{t=1}^{\tau} \frac{\sigma^2 R_0^2}{2^t \varepsilon_t^2} \ln \frac{M_{\nu}^{\frac{2}{1+3\nu}} 2^{\frac{(1-\nu)t}{1+3\nu}} \tau}{\mu^{\frac{2}{1+3\nu}} R_0^{\frac{2(1-\nu)}{1+3\nu}} \beta} \right\} \right) \\ &= \mathcal{O} \left( \max \left\{ \hat{N}, \sum_{t=1}^{\tau} \frac{\sigma^2 \cdot 2^t}{\mu^2 R_0^2} \ln \frac{M_{\nu}^{\frac{2}{1+3\nu}} 2^{\frac{(1-\nu)\tau}{1+3\nu}} \tau}{\mu^{\frac{2}{1+3\nu}} R_0^{\frac{2(1-\nu)}{1+3\nu}} \beta} \right\} \right) \\ &= \mathcal{O} \left( \max \left\{ \hat{N}, \frac{\sigma^2}{\mu \varepsilon} \ln \frac{M_{\nu}^{\frac{2}{1+3\nu}} \ln \frac{\mu R_0^2}{\varepsilon}}{\mu^{\frac{1+\nu}{1+3\nu}} \varepsilon^{\frac{1-\nu}{1+3\nu}} \beta} \right\} \right). \end{aligned}$$

719

□

720 One can also derive a similar result for **R-clipped-SSTM** when stepsize parameter  $a$  is chosen as in

721 Cor. B.1 for all restarts.

## C SGD with clipping: missing details and proofs

### C.1 Convex case

In this section, we provide a full statement of Thm. 3.1 together with its proof. The proof is based on a similar idea as the proof of the complexity bounds for clipped-SSTM.

**Theorem C.1.** Assume that function  $f$  is convex, achieves its minimum at a point  $x^*$ , and its gradients satisfy (3) with  $\nu \in [0, 1]$ ,  $M_\nu$  on  $Q = B_{7R_0} = \{x \in \mathbb{R}^n \mid \|x - x^*\|_2 \leq 7R_0\}$ , where  $R_0 \geq \|x^0 - x^*\|_2$ . Then, for all  $\beta \in (0, 1)$  and  $N$  such that

$$\ln \frac{4N}{\beta} \geq 2, \quad (72)$$

we have that after  $N$  iterations of clipped-SGD with

$$\lambda = \frac{R_0}{\gamma \ln \frac{4N}{\beta}}, \quad m \geq \max \left\{ 1, \frac{81N\sigma^2}{\lambda^2 \ln \frac{4N}{\beta}} \right\} \quad (73)$$

and stepsize

$$\gamma \leq \min \left\{ \frac{\varepsilon^{\frac{1-\nu}{1+\nu}}}{8M_\nu^{\frac{2}{1+\nu}}}, \frac{R_0}{\sqrt{2N}\varepsilon^{\frac{\nu}{1+\nu}}M_\nu^{\frac{1}{1+\nu}}}, \frac{R_0^{1-\nu}}{2C^\nu M_\nu \ln \frac{4N}{\beta}} \right\}, \quad (74)$$

with probability at least  $1 - \beta$  it holds that

$$f(\bar{x}^N) - f(x^*) \leq \frac{C^2 R_0^2}{\gamma N}, \quad (75)$$

where  $\bar{x}^N = \frac{1}{N} \sum_{k=0}^{N-1} x^k$  and

$$C = 7. \quad (76)$$

In other words, clipped-SGD with  $\gamma = \min \left\{ \frac{\varepsilon^{\frac{1-\nu}{1+\nu}}}{8M_\nu^{\frac{2}{1+\nu}}}, \frac{R_0}{\sqrt{2N}\varepsilon^{\frac{\nu}{1+\nu}}M_\nu^{\frac{1}{1+\nu}}}, \frac{R_0^{1-\nu}}{2C^\nu M_\nu \ln \frac{4N}{\beta}} \right\}$  achieves

$$f(\bar{x}^N) - f(x^*) \leq \varepsilon \text{ with probability at least } 1 - \beta \text{ after } \mathcal{O} \left( \max \left\{ \frac{M_\nu^{\frac{2}{1+\nu}} R_0^2}{\varepsilon^{\frac{2}{1+\nu}}}, \frac{M_\nu R_0^{1+\nu}}{\varepsilon} \ln \frac{M_\nu R_0^{1+\nu}}{\varepsilon \beta} \right\} \right)$$

iterations and requires

$$\mathcal{O} \left( \max \left\{ \frac{M_\nu^{\frac{2}{1+\nu}} R_0^2}{\varepsilon^{\frac{2}{1+\nu}}}, \max \left\{ \frac{M_\nu R_0^{1+\nu}}{\varepsilon}, \frac{\sigma^2 R_0^2}{\varepsilon^2} \right\} \ln \frac{M_\nu R_0^{1+\nu}}{\varepsilon \beta} \right\} \right) \quad (77)$$

oracle calls.

*Proof.* Since  $f(x)$  is convex and its gradients satisfy (3), we get the following inequality under assumption that  $x^k \in B_{7R_0}(x^*)$ :

$$\begin{aligned} \|x^{k+1} - x^*\|_2^2 &= \|x^k - \gamma \tilde{\nabla} f(x^k, \xi^k) - x^*\|_2^2 \\ &= \|x^k - x^*\|_2^2 + \gamma^2 \|\tilde{\nabla} f(x^k, \xi^k)\|_2^2 - 2\gamma \langle x^k - x^*, \tilde{\nabla} f(x^k, \xi^k) \rangle \\ &= \|x^k - x^*\|_2^2 + \gamma^2 \|\nabla f(x^k) + \theta_k\|_2^2 - 2\gamma \langle x^k - x^*, \nabla f(x^k) + \theta_k \rangle \\ &\stackrel{(11)}{\leq} \|x^k - x^*\|_2^2 + 2\gamma^2 \|\nabla f(x^k)\|_2^2 + 2\gamma^2 \|\theta_k\|_2^2 - 2\gamma \langle x^k - x^*, \nabla f(x^k) + \theta_k \rangle \\ &\stackrel{(21)}{\leq} \|x^k - x^*\|_2^2 - 2\gamma \left( 1 - 2\gamma \left( \frac{1}{\varepsilon} \right)^{\frac{1-\nu}{1+\nu}} M_\nu^{\frac{2}{1+\nu}} \right) (f(x^k) - f(x^*)) + 2\gamma^2 \|\theta_k\|_2^2 \\ &\quad - 2\gamma \langle x^k - x^*, \theta_k \rangle + 2\gamma^2 \varepsilon^{\frac{2\nu}{1+\nu}} M_\nu^{\frac{2}{1+\nu}}, \end{aligned}$$

where  $\theta_k = \tilde{\nabla} f(x^k, \xi^k) - \nabla f(x^k)$  and the last inequality follows from the convexity of  $f$ . Using

notation  $R_k \stackrel{\text{def}}{=} \|x^k - x^*\|_2$ ,  $k > 0$  we derive that for all  $k \geq 0$

$$R_{k+1}^2 \leq R_k^2 - 2\gamma \left( 1 - 2\gamma \left( \frac{1}{\varepsilon} \right)^{\frac{1-\nu}{1+\nu}} M_\nu^{\frac{2}{1+\nu}} \right) (f(x^k) - f(x^*)) + 2\gamma^2 \|\theta_k\|_2^2 - 2\gamma \langle x^k - x^*, \theta_k \rangle + 2\gamma^2 \varepsilon^{\frac{2\nu}{1+\nu}} M_\nu^{\frac{2}{1+\nu}}$$

under assumption that  $x^k \in B_{7R_0}(x^*)$ . Let us define  $A = 2\gamma \left(1 - 2\gamma \left(\frac{1}{\varepsilon}\right)^{\frac{1-\nu}{1+\nu}} M_\nu^{\frac{2}{1+\nu}}\right) \stackrel{(74)}{\geq} \gamma > 0$ ,  
then

$$A(f(x^k) - f(x^*)) \leq R_k^2 - R_{k+1}^2 + 2\gamma^2 \|\theta_k\|_2^2 - 2\gamma \langle x^k - x^*, \theta_k \rangle + 2\gamma^2 \varepsilon^{\frac{2\nu}{1+\nu}} M_\nu^{\frac{2}{1+\nu}}$$

under assumption that  $x^k \in B_{7R_0}(x^*)$ . Summing up these inequalities for  $k = 0, \dots, N-1$ , we  
obtain

$$\begin{aligned} \frac{A}{N} \sum_{k=0}^{N-1} [f(x^k) - f(x^*)] &\leq \frac{1}{N} \sum_{k=0}^{N-1} (R_k^2 - R_{k+1}^2) + 2\gamma^2 \varepsilon^{\frac{2\nu}{1+\nu}} M_\nu^{\frac{2}{1+\nu}} + \frac{2\gamma^2}{N} \sum_{k=0}^{N-1} \|\theta_k\|_2^2 \\ &\quad - \frac{2\gamma}{N} \sum_{k=0}^{N-1} \langle x^k - x^*, \theta_k \rangle \\ &= \frac{1}{N} (R_0^2 - R_N^2) + 2\gamma^2 \varepsilon^{\frac{2\nu}{1+\nu}} M_\nu^{\frac{2}{1+\nu}} + \frac{2\gamma^2}{N} \sum_{k=0}^{N-1} \|\theta_k\|_2^2 \\ &\quad - \frac{2\gamma}{N} \sum_{k=0}^{N-1} \langle x^k - x^*, \theta_k \rangle \end{aligned}$$

under assumption that  $x^k \in B_{7R_0}(x^*)$ . Noticing that for  $\bar{x}^N = \frac{1}{N} \sum_{k=0}^{N-1} x^k$  Jensen's inequality gives

$$f(\bar{x}^N) = f\left(\frac{1}{N} \sum_{k=0}^{N-1} x^k\right) \leq \frac{1}{N} \sum_{k=0}^{N-1} f(x^k), \text{ we have}$$

$$AN(f(\bar{x}^N) - f(x^*)) \leq R_0^2 - R_N^2 + 2\gamma^2 N \varepsilon^{\frac{2\nu}{1+\nu}} M_\nu^{\frac{2}{1+\nu}} + 2\gamma^2 \sum_{k=0}^{N-1} \|\theta_k\|_2^2 - 2\gamma \sum_{k=0}^{N-1} \langle x^k - x^*, \theta_k \rangle \quad (78)$$

under assumption that  $x^k \in B_{7R_0}(x^*)$  for  $k = 0, 1, \dots, N-1$ . Taking into account that  $f(\bar{x}^N) - f(x^*) \geq 0$  and changing the indices we get that for all  $k = 0, 1, \dots, N$

$$R_k^2 \leq R_0^2 + 2\gamma^2 k \varepsilon^{\frac{2\nu}{1+\nu}} M_\nu^{\frac{2}{1+\nu}} + 2\gamma^2 \sum_{l=0}^{k-1} \|\theta_l\|_2^2 - 2\gamma \sum_{l=0}^{k-1} \langle x^l - x^*, \theta_l \rangle. \quad (79)$$

under assumption that  $x^l \in B_{7R_0}(x^*)$  for  $l = 0, 1, \dots, k-1$ . The remaining part of the proof is based  
on the analysis of inequality (79). In particular, via induction we prove that for all  $k = 0, 1, \dots, N$   
with probability at least  $1 - \frac{k\beta}{N}$  the following statement holds: inequalities

$$R_t^2 \stackrel{(79)}{\leq} R_0^2 + 2\gamma^2 t \varepsilon^{\frac{2\nu}{1+\nu}} M_\nu^{\frac{2}{1+\nu}} + 2\gamma^2 \sum_{l=0}^{t-1} \|\theta_l\|_2^2 - 2\gamma \sum_{l=0}^{t-1} \langle x^l - x^*, \theta_l \rangle \leq C^2 R_0^2 \quad (80)$$

hold for  $t = 0, 1, \dots, k$  simultaneously where  $C$  is defined in (76). Let us define the probability  
event when this statement holds as  $E_k$ . Then, our goal is to show that  $\mathbb{P}\{E_k\} \geq 1 - \frac{k\beta}{N}$  for all  
 $k = 0, 1, \dots, N$ . For  $t = 0$  inequality (80) holds with probability 1 since  $C \geq 1$ . Next, assume  
that for some  $k = T-1 \leq N-1$  we have  $\mathbb{P}\{E_k\} = \mathbb{P}\{E_{T-1}\} \geq 1 - \frac{(T-1)\beta}{N}$ . Let us prove  
that  $\mathbb{P}\{E_T\} \geq 1 - \frac{T\beta}{N}$ . First of all, probability event  $E_{T-1}$  implies that  $x^t \in B_{7R_0}(x^*)$  for  
 $t = 0, 1, \dots, T-1$ , and, as a consequence, (79) holds for  $k = T$ . Since  $\nabla f(x)$  is  $(\nu, M_\nu)$ -Hölder  
continuous on  $B_{7R_0}(x^*)$ , we have that probability event  $E_{T-1}$  implies

$$\|\nabla f(x^t)\|_2 \stackrel{(3)}{\leq} M_\nu \|x^t - x^0\|^\nu \leq M_\nu C^\nu R_0^\nu \stackrel{(74)}{\leq} \frac{\lambda}{2} \quad (81)$$

for  $t = 0, \dots, T-1$ . Next, we introduce new random variables:

$$\eta_l = \begin{cases} x^* - x^l, & \text{if } \|x^* - x^l\|_2 \leq CR_0, \\ 0, & \text{otherwise,} \end{cases} \quad (82)$$

for  $l = 0, 1, \dots, T-1$ . Note that these random variables are bounded with probability 1, i.e. with probability 1 we have

$$\|\eta_l\|_2 \leq CR_0. \quad (83)$$

Using the introduced notation, we obtain that  $E_{T-1}$  implies

$$R_T^2 \stackrel{(73),(74),(79),(80),(82)}{\leq} 2R_0^2 + 2\gamma \sum_{l=0}^{T-1} \langle \theta_l, \eta_l \rangle + 2\gamma^2 \sum_{l=0}^{T-1} \|\theta_l\|_2^2.$$

Finally, we do some preliminaries in order to apply Bernstein's inequality (see Lemma A.2) and obtain that  $E_{T-1}$  implies

$$\begin{aligned} R_T^2 &\stackrel{(11)}{\leq} \underbrace{2R_0^2 + 2\gamma \sum_{l=0}^{T-1} \langle \theta_l^u, \eta_l \rangle}_{\textcircled{1}} + \underbrace{2\gamma \sum_{l=0}^{T-1} \langle \theta_l^b, \eta_l \rangle}_{\textcircled{2}} + \underbrace{4\gamma^2 \sum_{l=0}^{T-1} (\|\theta_l^u\|_2^2 - \mathbb{E}_{\xi^l} [\|\theta_l^u\|_2^2])}_{\textcircled{3}} \\ &\quad + \underbrace{4\gamma^2 \sum_{l=0}^{T-1} \mathbb{E}_{\xi^l} [\|\theta_l^u\|_2^2]}_{\textcircled{4}} + \underbrace{4\gamma^2 \sum_{l=0}^{T-1} \|\theta_l^b\|_2^2}_{\textcircled{5}}, \end{aligned} \quad (84)$$

where we introduce new notations:

$$\theta_l^u \stackrel{\text{def}}{=} \tilde{\nabla} f(x^l, \xi^l) - \mathbb{E}_{\xi^l} [\tilde{\nabla} f(x^l, \xi^l)], \quad \theta_l^b \stackrel{\text{def}}{=} \mathbb{E}_{\xi^l} [\tilde{\nabla} f(x^l, \xi^l)] - \nabla f(x^l), \quad (85)$$

766

$$\theta_l = \theta_l^u + \theta_l^b.$$

It remains to provide tight upper bounds for  $\textcircled{1}$ ,  $\textcircled{2}$ ,  $\textcircled{3}$ ,  $\textcircled{4}$  and  $\textcircled{5}$ , i.e. in the remaining part of the proof we show that  $\textcircled{1} + \textcircled{2} + \textcircled{3} + \textcircled{4} + \textcircled{5} \leq \delta C^2 R_0^2$  for some  $\delta < 1$ .

**Upper bound for  $\textcircled{1}$ .** First of all, since  $\mathbb{E}_{\xi^l}[\theta_l^u] = 0$  summands in  $\textcircled{1}$  are conditionally unbiased:

$$\mathbb{E}_{\xi^l} [2\gamma \langle \theta_l^u, \eta_l \rangle] = 0.$$

Secondly, these summands are bounded with probability 1:

$$|2\gamma \langle \theta_l^u, \eta_l \rangle| \leq 2\gamma \|\theta_l^u\|_2 \|\eta_l\|_2 \stackrel{(29),(83)}{\leq} 4\gamma \lambda CR_0.$$

Finally, one can bound conditional variances  $\sigma_l^2 \stackrel{\text{def}}{=} \mathbb{E}_{\xi^l} [4\gamma^2 \langle \theta_l^u, \eta_l \rangle^2]$  in the following way:

$$\sigma_l^2 \leq \mathbb{E}_{\xi^l} [4\gamma^2 \|\theta_l^u\|_2^2 \|\eta_l\|_2^2] \stackrel{(83)}{\leq} 4\gamma^2 (CR_0)^2 \mathbb{E}_{\xi^l} [\|\theta_l^u\|_2^2].$$

In other words, sequence  $\{2\gamma \langle \theta_l^u, \eta_l \rangle\}_{l \geq 0}$  is a bounded martingale difference sequence with bounded conditional variances  $\{\sigma_l^2\}_{l \geq 0}$ . Therefore, we can apply Bernstein's inequality, i.e., we apply

Lemma A.2 with  $X_l = 2\gamma \langle \theta_l^u, \eta_l \rangle$ ,  $c = 4\gamma \lambda CR_0$  and  $F = \frac{c^2 \ln \frac{4N}{\beta}}{6}$  and get that for all  $b > 0$

$$\mathbb{P} \left\{ \left| \sum_{l=0}^{T-1} X_l \right| > b \text{ and } \sum_{l=0}^{T-1} \sigma_l^2 \leq F \right\} \leq 2 \exp \left( -\frac{b^2}{2F + 2cb/3} \right)$$

or, equivalently, with probability at least  $1 - 2 \exp \left( -\frac{b^2}{2F + 2cb/3} \right)$

$$\text{either } \sum_{l=0}^{T-1} \sigma_l^2 > F \quad \text{or} \quad \underbrace{\left| \sum_{l=0}^{T-1} X_l \right|}_{|\textcircled{1}|} \leq b.$$

The choice of  $F$  will be clarified further, let us now choose  $b$  in such a way that  $2 \exp \left( -\frac{b^2}{2F + 2cb/3} \right) = \frac{\beta}{2N}$ . This implies that  $b$  is the positive root of the quadratic equation

$$b^2 - \frac{2c \ln \frac{4N}{\beta}}{3} b - 2F \ln \frac{4N}{\beta} = 0,$$

778 hence

$$\begin{aligned} b &= \frac{c \ln \frac{4N}{\beta}}{3} + \sqrt{\frac{c^2 \ln^2 \frac{4N}{\beta}}{9} + 2F \ln \frac{4N}{\beta}} = \frac{c \ln \frac{4N}{\beta}}{3} + \sqrt{\frac{4c^2 \ln^2 \frac{4N}{\beta}}{9}} \\ &= c \ln \frac{4N}{\beta} = 4\gamma\lambda CR_0 \ln \frac{4N}{\beta}. \end{aligned}$$

779 That is, with probability at least  $1 - \frac{\beta}{2N}$

$$\underbrace{\text{either } \sum_{l=0}^{T-1} \sigma_l^2 > F \quad \text{or} \quad |\mathbb{Q}| \leq 4\gamma\lambda CR_0 \ln \frac{4N}{\beta}}_{\text{probability event } E_{\mathbb{Q}}}.$$

780 Next, we notice that probability event  $E_{T-1}$  implies that

$$\begin{aligned} \sum_{l=0}^{T-1} \sigma_l^2 &\leq 4\gamma^2 (CR_0)^2 \sum_{l=0}^{T-1} \mathbb{E}_{\xi^l} [\|\theta_l^u\|_2^2] \stackrel{(32)}{\leq} 72\gamma^2 (CR_0)^2 \sigma^2 \frac{T}{m} \\ &\stackrel{T \leq N}{\leq} 72\gamma^2 (CR_0)^2 \sigma^2 \frac{N}{m} \leq \frac{c^2 \ln \frac{4N}{\beta}}{6} = F, \end{aligned}$$

781 where the last inequality follows from  $c = 4\gamma\lambda CR_0$  and simple arithmetic.

782 **Upper bound for ②.** First of all, we notice that probability event  $E_{T-1}$  implies

$$2\gamma \langle \theta_l^b, \eta_l \rangle \leq 2\gamma \|\theta_l^b\|_2 \|\eta_l\|_2 \stackrel{(30),(83)}{\leq} 2\gamma \frac{4\sigma^2}{m\lambda} CR_0 = \frac{8\gamma\sigma^2 CR_0}{m\lambda}.$$

783 This implies that

$$\textcircled{2} = 2\gamma \sum_{l=0}^{T-1} \langle \theta_l^b, \eta_l \rangle \stackrel{T \leq N}{\leq} \frac{8\gamma\sigma^2 CR_0 N}{m\lambda} \stackrel{(73)}{\leq} \frac{8}{81} \lambda \gamma CR_0 \ln \frac{4N}{\beta}.$$

784 **Upper bound for ③.** We derive the upper bound for ③ using the same technique as for ①. First of  
785 all, we notice that the summands in ③ are conditionally unbiased:

$$\mathbb{E}_{\xi^l} [4\gamma^2 (\|\theta_l^u\|_2^2 - \mathbb{E}_{\xi^l} [\|\theta_l^u\|_2^2])] = 0.$$

786 Secondly, the summands are bounded with probability 1:

$$\begin{aligned} |4\gamma^2 (\|\theta_l^u\|_2^2 - \mathbb{E}_{\xi^l} [\|\theta_l^u\|_2^2])| &\leq 4\gamma^2 (\|\theta_l^u\|_2^2 + \mathbb{E}_{\xi^l} [\|\theta_l^u\|_2^2]) \stackrel{(29)}{\leq} 4\gamma^2 (4\lambda^2 + 4\lambda^2) \\ &= 32\gamma^2 \lambda^2 \stackrel{\text{def}}{=} c_1. \end{aligned} \tag{86}$$

787 Finally, one can bound conditional variances  $\hat{\sigma}_l^2 \stackrel{\text{def}}{=} \mathbb{E}_{\xi^l} [4\gamma^2 (\|\theta_l^u\|_2^2 - \mathbb{E}_{\xi^l} [\|\theta_l^u\|_2^2])^2]$  in the  
788 following way:

$$\begin{aligned} \hat{\sigma}_l^2 &\stackrel{(86)}{\leq} c_1 \mathbb{E}_{\xi^l} [4\gamma^2 (\|\theta_l^u\|_2^2 - \mathbb{E}_{\xi^l} [\|\theta_l^u\|_2^2])^2] \\ &\leq 4\gamma^2 c_1 \mathbb{E}_{\xi^l} [\|\theta_l^u\|_2^2 + \mathbb{E}_{\xi^l} [\|\theta_l^u\|_2^2]] = 8\gamma^2 c_1 \mathbb{E}_{\xi^l} [\|\theta_l^u\|_2^2]. \end{aligned} \tag{87}$$

789 In other words, sequence  $\{4\gamma^2 (\|\theta_l^u\|_2^2 - \mathbb{E}_{\xi^l} [\|\theta_l^u\|_2^2])\}_{l \geq 0}$  is a bounded martingale difference se-  
790 quence with bounded conditional variances  $\{\hat{\sigma}_l^2\}_{l \geq 0}$ . Therefore, we can apply Bernstein's inequality,  
791 i.e. we apply Lemma A.2 with  $X_l = \hat{X}_l = 4\gamma^2 (\|\theta_l^u\|_2^2 - \mathbb{E}_{\xi^l} [\|\theta_l^u\|_2^2])$ ,  $c = c_1 = 32\gamma^2 \lambda^2$  and  
792  $F = F_1 = \frac{c_1^2 \ln \frac{4N}{\beta}}{18}$  and get that for all  $b > 0$

$$\mathbb{P} \left\{ \left| \sum_{l=0}^{T-1} \hat{X}_l \right| > b \text{ and } \sum_{l=0}^{T-1} \hat{\sigma}_l^2 \leq F_1 \right\} \leq 2 \exp \left( -\frac{b^2}{2F_1 + 2c_1 b/3} \right)$$

793 or, equivalently, with probability at least  $1 - 2 \exp\left(-\frac{b^2}{2F_1 + 2c_1 b/3}\right)$

$$\text{either } \sum_{l=0}^{T-1} \hat{\sigma}_l^2 > F_1 \quad \text{or} \quad \underbrace{\left| \sum_{l=0}^{T-1} \hat{X}_l \right|}_{|\textcircled{3}|} \leq b.$$

794 As in our derivations of the upper bound for ① we choose such  $b$  that  $2 \exp\left(-\frac{b^2}{2F_1 + 2c_1 b/3}\right) = \frac{\beta}{2N}$ ,  
795 i.e.,

$$b = \frac{c_1 \ln \frac{4N}{\beta}}{3} + \sqrt{\frac{c_1^2 \ln^2 \frac{4N}{\beta}}{9} + 2F_1 \ln \frac{4N}{\beta}} \leq c_1 \ln \frac{4N}{\beta} = 32\gamma^2 \lambda^2 \ln \frac{4N}{\beta}.$$

796 That is, with probability at least  $1 - \frac{\beta}{2N}$

$$\underbrace{\text{either } \sum_{l=0}^{T-1} \hat{\sigma}_l^2 > F_1 \quad \text{or} \quad |\textcircled{3}| \leq 32\gamma^2 \lambda^2 \ln \frac{4N}{\beta}}_{\text{probability event } E_{\textcircled{3}}}.$$

797 Next, we notice that probability event  $E_{T-1}$  implies that

$$\begin{aligned} \sum_{l=0}^{T-1} \hat{\sigma}_l^2 &\stackrel{(87)}{\leq} 8\gamma^2 c_1 \sum_{l=0}^{T-1} \mathbb{E}_{\xi^l} [\|\theta_l^u\|_2^2] \stackrel{(32)}{\leq} 144\gamma^2 c_1 \sigma^2 \frac{T}{m} \\ &\stackrel{T \leq N}{\leq} 144\gamma^2 c_1 \sigma^2 \frac{N}{m} = \frac{c_1^2 \ln \frac{4N}{\beta}}{18} \leq F_1. \end{aligned}$$

798 **Upper bound for ④.** The probability event  $E_{T-1}$  implies

$$\textcircled{4} = 4\gamma^2 \sum_{l=0}^{T-1} \mathbb{E}_{\xi^l} [\|\theta_l^u\|_2^2] \stackrel{(32)}{\leq} 72\gamma^2 \sigma^2 \sum_{l=0}^{T-1} \frac{1}{m} \stackrel{T \leq N}{\leq} \frac{72\gamma^2 N \sigma^2}{m} \stackrel{(73)}{\leq} \frac{8}{9} \lambda^2 \gamma^2 \ln \frac{4N}{\beta}.$$

799 **Upper bound for ⑤.** Again, we use corollaries of probability event  $E_{T-1}$ :

$$\textcircled{5} = 4\gamma^2 \sum_{l=0}^{T-1} \|\theta_l^b\|_2^2 \stackrel{(30)}{\leq} 64\gamma^2 \sigma^4 \frac{T}{m^2 \lambda^2} \stackrel{T \leq N}{\leq} 64\gamma^2 \sigma^4 \frac{N}{m^2 \lambda^2} \stackrel{(73)}{\leq} \frac{64}{6561} \frac{\lambda^2 \gamma^2 \ln^2 \frac{4N}{\beta}}{N}.$$

800 Now we summarize all bound that we have: probability event  $E_{T-1}$  implies

$$\begin{aligned} R_T^2 &\stackrel{(79)}{\leq} 2R_0^2 + 2\gamma^2 \sum_{l=0}^{T-1} \|\theta_l\|_2^2 - 2\gamma \sum_{l=0}^{T-1} \langle x^l - x^*, \theta_l \rangle \\ &\stackrel{(84)}{\leq} 2R_0^2 + \textcircled{1} + \textcircled{2} + \textcircled{3} + \textcircled{4} + \textcircled{5}, \\ \textcircled{2} &\leq \frac{8}{81} \lambda \gamma C R_0 \ln \frac{4N}{\beta}, \quad \textcircled{4} \leq \frac{8}{9} \lambda^2 \gamma^2 \ln \frac{4N}{\beta}, \quad \textcircled{5} \leq \frac{64}{6561} \frac{\lambda^2 \gamma^2 \ln^2 \frac{4N}{\beta}}{N}, \\ \sum_{l=0}^{T-1} \sigma_l^2 &\leq F, \quad \sum_{l=0}^{T-1} \hat{\sigma}_l^2 \leq F_1 \end{aligned}$$

801 and

$$\mathbb{P}\{E_{T-1}\} \geq 1 - \frac{(T-1)\beta}{N}, \quad \mathbb{P}\{E_{\textcircled{1}}\} \geq 1 - \frac{\beta}{2N}, \quad \mathbb{P}\{E_{\textcircled{3}}\} \geq 1 - \frac{\beta}{2N},$$

802 where

$$\begin{aligned} E_{\textcircled{1}} &= \left\{ \text{either } \sum_{l=0}^{T-1} \sigma_l^2 > F \quad \text{or} \quad |\textcircled{1}| \leq 4\gamma \lambda C R_0 \ln \frac{4N}{\beta} \right\}, \\ E_{\textcircled{3}} &= \left\{ \text{either } \sum_{l=0}^{T-1} \hat{\sigma}_l^2 > F_1 \quad \text{or} \quad |\textcircled{3}| \leq 32\gamma^2 \lambda^2 \ln \frac{4N}{\beta} \right\}. \end{aligned}$$

803 Taking into account these inequalities and our assumptions on  $\lambda$  and  $\gamma$  (see (73) and (74)) we get that  
 804 probability event  $E_{T-1} \cap E_{\textcircled{1}} \cap E_{\textcircled{3}}$  implies

$$\begin{aligned} R_T^2 &\stackrel{(79)}{\leq} 2R_0^2 + 2\gamma^2 \sum_{l=0}^{T-1} \|\theta_l\|_2^2 - 2\gamma \sum_{l=0}^{T-1} \langle x^l - x^*, \theta_l \rangle \\ &\leq 2R_0^2 + \left( \frac{4}{7} + \frac{8}{567} + \frac{16}{49} + \frac{4}{441} + \frac{64}{321489} \right) C^2 R_0^2 \stackrel{(76)}{\leq} C^2 R_0^2. \end{aligned} \quad (88)$$

805 Moreover, using union bound we derive

$$\mathbb{P}\{E_{T-1} \cap E_{\textcircled{1}} \cap E_{\textcircled{3}}\} = 1 - \mathbb{P}\{\bar{E}_{T-1} \cup \bar{E}_{\textcircled{1}} \cup \bar{E}_{\textcircled{3}}\} \geq 1 - \frac{T\beta}{N}. \quad (89)$$

806 That is, by definition of  $E_T$  and  $E_{T-1}$  we have proved that

$$\mathbb{P}\{E_T\} \stackrel{(88)}{\geq} \mathbb{P}\{E_{T-1} \cap E_{\textcircled{1}} \cap E_{\textcircled{3}}\} \stackrel{(89)}{\geq} 1 - \frac{T\beta}{N},$$

807 which implies that for all  $k = 0, 1, \dots, N$  we have  $\mathbb{P}\{E_k\} \geq 1 - \frac{k\beta}{N}$ . Then, for  $k = N$  we have that  
 808 with probability at least  $1 - \beta$

$$AN(f(\bar{x}^N) - f(x^*)) \stackrel{(78)}{\leq} 2R_0^2 + 2\gamma^2 \sum_{k=0}^{N-1} \|\theta_k\|_2^2 - 2\gamma \sum_{k=0}^{N-1} \langle x^k - x^*, \theta_k \rangle \stackrel{(80)}{\leq} C^2 R_0^2.$$

809 Since  $A = 2\gamma \left(1 - 2\gamma \left(\frac{1}{\varepsilon}\right)^{\frac{1-\nu}{1+\nu}} M_\nu^{\frac{2}{1+\nu}}\right) \stackrel{(74)}{\geq} \gamma$  we get that with probability at least  $1 - \beta$

$$f(\bar{x}^N) - f(x^*) \leq \frac{C^2 R_0^2}{AN} = \frac{C^2 R_0^2}{\gamma N}.$$

810 When

$$\gamma = \min \left\{ \frac{\varepsilon^{\frac{1-\nu}{1+\nu}}}{8M_\nu^{\frac{2}{1+\nu}}}, \frac{R_0}{\sqrt{2N}\varepsilon^{\frac{\nu}{1+\nu}} M_\nu^{\frac{1}{1+\nu}}}, \frac{R_0^{1-\nu}}{2C^\nu M_\nu \ln \frac{4N}{\beta}} \right\}$$

811 we have that with probability at least  $1 - \beta$

$$f(\bar{x}^N) - f(x^*) \leq \max \left\{ \frac{8C^2 M_\nu^{\frac{2}{1+\nu}} R_0^2}{\varepsilon^{\frac{1-\nu}{1+\nu}} N}, \frac{\sqrt{2} C^2 M_\nu^{\frac{1}{1+\nu}} R_0 \varepsilon^{\frac{\nu}{1+\nu}}}{\sqrt{N}}, \frac{2C^{2+\nu} M_\nu R_0^{1+\nu} \ln \frac{4N}{\beta}}{N} \right\}.$$

812 Next, we estimate the iteration and oracle complexities of the method and consider 3 possible  
 813 situations.

814 1. If  $\gamma = \frac{\varepsilon^{\frac{1-\nu}{1+\nu}}}{8M_\nu^{\frac{2}{1+\nu}}}$ , then with probability at least  $1 - \beta$

$$f(\bar{x}^N) - f(x^*) \leq \frac{8C^2 M_\nu^{\frac{2}{1+\nu}} R_0^2}{\varepsilon^{\frac{1-\nu}{1+\nu}} N}.$$

815 In other words, clipped-SGD achieves  $f(\bar{x}^N) - f(x^*) \leq \varepsilon$  with probability at least  $1 - \beta$   
 816 after

$$\mathcal{O} \left( \frac{M_\nu^{\frac{2}{1+\nu}} R_0^2}{\varepsilon^{\frac{2}{1+\nu}}} \right)$$

817 iterations and requires

$$\begin{aligned} Nm &\stackrel{(73)}{=} \mathcal{O} \left( \max \left\{ N, \frac{N^2 \sigma^2 \gamma^2 \ln \frac{N}{\beta}}{R_0^2} \right\} \right) = \mathcal{O} \left( \max \left\{ N, \frac{N^2 \varepsilon^{\frac{2(1-\nu)}{1+\nu}} \sigma^2 \ln \frac{N}{\beta}}{M_\nu^{\frac{4}{1+\nu}} R_0^2} \right\} \right) \\ &= \mathcal{O} \left( \max \left\{ \frac{M_\nu^{\frac{2}{1+\nu}} R_0^2}{\varepsilon^{\frac{2}{1+\nu}}}, \frac{\sigma^2 R_0^2}{\varepsilon^2} \ln \frac{M_\nu^{\frac{2}{1+\nu}} R_0^2}{\varepsilon^{\frac{2}{1+\nu}} \beta} \right\} \right) \end{aligned}$$

818 oracle calls.

819 2. If  $\gamma = \frac{R_0}{\sqrt{2N}\varepsilon^{\frac{\nu}{1+\nu}} M_\nu^{\frac{1}{1+\nu}}}$ , then with probability at least  $1 - \beta$

$$f(\bar{x}^N) - f(x^*) \leq \frac{\sqrt{2}C^2 M_\nu^{\frac{1}{1+\nu}} R_0 \varepsilon^{\frac{\nu}{1+\nu}}}{\sqrt{N}}.$$

820 In other words, clipped-SGD achieves  $f(\bar{x}^N) - f(x^*) \leq \varepsilon$  with probability at least  $1 - \beta$   
821 after

$$\mathcal{O}\left(\frac{M_\nu^{\frac{2}{1+\nu}} R_0^2}{\varepsilon^{\frac{2}{1+\nu}}}\right)$$

822 iterations and requires

$$\begin{aligned} Nm &\stackrel{(73)}{=} \mathcal{O}\left(\max\left\{N, \frac{N^2 \sigma^2 \gamma^2 \ln \frac{N}{\beta}}{R_0^2}\right\}\right) = \mathcal{O}\left(\max\left\{N, \frac{N \sigma^2 \ln \frac{N}{\beta}}{\varepsilon^{\frac{2\nu}{1+\nu}} M_\nu^{\frac{2}{1+\nu}}}\right\}\right) \\ &= \mathcal{O}\left(\max\left\{\frac{M_\nu^{\frac{2}{1+\nu}} R_0^2}{\varepsilon^{\frac{2}{1+\nu}}}, \frac{\sigma^2 R_0^2}{\varepsilon^2} \ln \frac{M_\nu^{\frac{2}{1+\nu}} R_0^2}{\varepsilon^{\frac{2}{1+\nu}} \beta}\right\}\right) \end{aligned}$$

823 oracle calls.

824 3. If  $\gamma = \frac{R_0^{1-\nu}}{2C^\nu M_\nu \ln \frac{4N}{\beta}}$ , then with probability at least  $1 - \beta$

$$f(\bar{x}^N) - f(x^*) \leq \frac{2C^{2+\nu} M_\nu R_0^{1+\nu} \ln \frac{4N}{\beta}}{N}.$$

825 In other words, clipped-SGD achieves  $f(\bar{x}^N) - f(x^*) \leq \varepsilon$  with probability at least  $1 - \beta$   
826 after

$$\mathcal{O}\left(\frac{M_\nu R_0^{1+\nu} \ln \frac{M_\nu R_0^{1+\nu}}{\varepsilon \beta}}{\varepsilon}\right)$$

827 iterations and requires

$$\begin{aligned} Nm &\stackrel{(73)}{=} \mathcal{O}\left(\max\left\{N, \frac{N^2 \sigma^2 \gamma^2 \ln \frac{N}{\beta}}{R_0^2}\right\}\right) = \mathcal{O}\left(\max\left\{N, \frac{N^2 \sigma^2}{M_\nu^2 R_0^{2\nu} \ln \frac{N}{\beta}}\right\}\right) \\ &= \mathcal{O}\left(\max\left\{\frac{M_\nu R_0^{1+\nu}}{\varepsilon}, \frac{\sigma^2 R_0^2}{\varepsilon^2}\right\} \ln \frac{M_\nu R_0^{1+\nu}}{\varepsilon \beta}\right) \end{aligned}$$

828 oracle calls.

829 Putting all together and noticing that  $\ln \frac{M_\nu^{\frac{2}{1+\nu}} R_0^2}{\varepsilon^{\frac{2}{1+\nu}} \beta} = \mathcal{O}\left(\ln \frac{M_\nu R_0^{1+\nu}}{\varepsilon \beta}\right)$  we get the desired result.  $\square$

830 As for clipped-SSTM it is possible to get rid of using large batchsizes without sacrificing the oracle  
831 complexity via a proper choice of  $\gamma$ , i.e., it is sufficient to choose

$$\gamma = \min\left\{\frac{\varepsilon^{\frac{1-\nu}{1+\nu}}}{8M_\nu^{\frac{2}{1+\nu}}}, \frac{R_0}{\sqrt{2N}\varepsilon^{\frac{\nu}{1+\nu}} M_\nu^{\frac{1}{1+\nu}}}, \frac{R_0^{1-\nu}}{2C^\nu M_\nu \ln \frac{4N}{\beta}}, \frac{R_0}{9\sigma N \ln \frac{4N}{\beta}}\right\}.$$

## 832 C.2 Strongly convex case

833 In this section, we provide a full statement of Thm. 3.2 together with its proof. Note that due to  
834 strong convexity the solution  $x^*$  is unique.



**Theorem C.2.** Assume that function  $f$  is  $\mu$ -strongly convex and its gradients satisfy (3) with  $\nu \in [0, 1]$ ,  $M_\nu > 0$  on  $Q = B_{2R_0} = \{x \in \mathbb{R}^n \mid \|x - x^*\|_2 \leq 2R_0\}$ , where  $R_0 \geq \|x^0 - x^*\|_2$ . Let  $\varepsilon > 0$ ,  $\beta \in (0, 1)$ , and for all  $t = 1, \dots, \tau$

$$N_t = \max \left\{ \frac{2C^4 M_\nu^{\frac{2}{1+\nu}} R_0^2}{2^t \varepsilon_t^{\frac{2}{1+\nu}}}, \frac{4C^{2+\nu} M_\nu R_0^{1+\nu} \ln \frac{16C^{2+\nu} M_\nu R_0^{1+\nu}}{2^{\frac{(1+\nu)t}{2}} \varepsilon_t \beta}}{2^{\frac{(1+\nu)t}{2}} \varepsilon_t} \right\}, \quad \varepsilon_t = \frac{\mu R_0^2}{2^{t+1}},$$

$$\lambda_t = \frac{R_0}{2^{\frac{t}{2}} \gamma_t \ln \frac{4N_t \tau}{\beta}}, \quad m_t \geq \max \left\{ 1, \frac{81N_t \sigma^2}{\lambda_t^2 \ln \frac{4N_t \tau}{\beta}} \right\}, \quad \ln \frac{4N_t \tau}{\beta} \geq 2,$$

$$\gamma_t = \min \left\{ \frac{\varepsilon_t^{\frac{1-\nu}{1+\nu}}}{8M_\nu^{\frac{2}{1+\nu}}}, \frac{R_0}{2^{\frac{t}{2}} \sqrt{2N_t} \varepsilon_t^{\frac{\nu}{1+\nu}} M_\nu^{\frac{1}{1+\nu}}}, \frac{R_0^{1-\nu}}{2^{1+\frac{(1-\nu)t}{2}} C^\nu M_\nu \ln \frac{4N_t \tau}{\beta}} \right\}.$$

Then R-clipped-SGD achieves  $f(\bar{x}^\tau) - f(x^*) \leq \varepsilon$  with probability at least  $1 - \beta$  after

$$\mathcal{O} \left( \max \left\{ D_1^{\frac{2}{1+\nu}} \ln \frac{\mu R_0^2}{\varepsilon}, D_2^{\frac{2}{1+\nu}}, \max \left\{ D_1 \ln \frac{\mu R_0^2}{\varepsilon}, D_2 \right\} \ln \frac{D}{\beta} \right\} \right)$$

iterations of Alg. 3 in total and requires

$$\mathcal{O} \left( \max \left\{ D_1^{\frac{2}{1+\nu}} \ln \frac{\mu R_0^2}{\varepsilon}, D_2^{\frac{2}{1+\nu}}, \max \left\{ D_1 \ln \frac{\mu R_0^2}{\varepsilon}, D_2, \frac{\sigma^2}{\mu \varepsilon} \right\} \ln \frac{D}{\beta} \right\} \right) \quad (90)$$

oracle calls, where

$$D_1 = \frac{M_\nu}{\mu R_0^{1-\nu}}, \quad D_2 = \frac{M_\nu}{\mu^{\frac{1+\nu}{2}} \varepsilon^{\frac{1-\nu}{2}}}, \quad D = D_2 \ln \frac{\mu R_0^2}{\varepsilon}.$$

*Proof.* Applying Thm. C.1, we obtain that with probability at least  $1 - \frac{\beta}{\tau}$

$$f(\hat{x}^1) - f(x^*) \leq \frac{\mu R_0^2}{4}.$$

Since  $f$  is  $\mu$ -strongly convex we have

$$\frac{\mu \|\hat{x}^1 - x^*\|_2^2}{2} \leq f(\hat{x}^1) - f(x^*).$$

Therefore, with probability at least  $1 - \frac{\beta}{\tau}$

$$f(\hat{x}^1) - f(x^*) \leq \frac{\mu R_0^2}{4}, \quad \|\hat{x}^1 - x^*\|_2^2 \leq \frac{R_0^2}{2}.$$

From mathematical induction and the union bound for probability events it follows that inequalities

$$f(\hat{x}^t) - f(x^*) \leq \frac{\mu R_0^2}{2^{t+1}}, \quad \|\hat{x}^t - x^*\|_2^2 \leq \frac{R_0^2}{2^t}$$

hold simultaneously for  $t = 1, \dots, \tau$  with probability at least  $1 - \beta$ . In particular, it means that after

$\tau = \left\lceil \log_2 \frac{\mu R_0^2}{\varepsilon} \right\rceil - 1$  restarts R-clipped-SGD finds an  $\varepsilon$ -solution with probability at least  $1 - \beta$ . The

total number of iterations  $\hat{N}$  is

$$\begin{aligned} \sum_{t=1}^{\tau} N_t &= \mathcal{O} \left( \sum_{t=1}^{\tau} \max \left\{ \frac{M_\nu^{\frac{2}{1+\nu}} R_0^2}{2^t \varepsilon_t^{\frac{2}{1+\nu}}}, \frac{M_\nu R_0^{1+\nu}}{2^{\frac{(1+\nu)t}{2}} \varepsilon_t} \ln \frac{M_\nu R_0^{1+\nu} \tau}{2^{\frac{(1+\nu)t}{2}} \varepsilon_t \beta} \right\} \right) \\ &= \mathcal{O} \left( \sum_{t=1}^{\tau} \max \left\{ \frac{M_\nu^{\frac{2}{1+\nu}} \cdot 2^{\frac{(1-\nu)t}{2}}}{\mu^{\frac{2}{1+\nu}} R_0^{\frac{2(1-\nu)}{1+\nu}}}, \frac{M_\nu \cdot 2^{\frac{(1-\nu)t}{2}}}{\mu R_0^{1-\nu}} \ln \frac{M_\nu \cdot 2^{\frac{(1-\nu)\tau}{2}} \tau}{\mu R_0^{1-\nu} \beta} \right\} \right) \\ &= \mathcal{O} \left( \max \left\{ \frac{M_\nu^{\frac{2}{1+\nu}}}{\mu^{\frac{2}{1+\nu}} R_0^{\frac{2(1-\nu)}{1+\nu}}}, \frac{M_\nu}{\mu R_0^{1-\nu}} \ln \frac{M_\nu \ln \frac{\mu R_0^2}{\varepsilon}}{\mu^{\frac{1+\nu}{2}} \varepsilon^{\frac{1-\nu}{2}} \beta} \right\} \cdot \max \left\{ \ln \frac{\mu R_0^2}{\varepsilon}, \left( \frac{\mu R_0^2}{\varepsilon} \right)^{\frac{1-\nu}{2}} \right\} \right) \\ &= \mathcal{O} \left( \max \left\{ D_1^{\frac{2}{1+\nu}} \ln \frac{\mu R_0^2}{\varepsilon}, D_2^{\frac{2}{1+\nu}}, \max \left\{ D_1 \ln \frac{\mu R_0^2}{\varepsilon}, D_2 \right\} \ln \frac{D}{\beta} \right\} \right), \end{aligned}$$

850 where

$$D_1 = \frac{M_\nu}{\mu R_0^{1-\nu}}, \quad D_2 = \frac{M_\nu}{\mu^{\frac{1+\nu}{2}} \varepsilon^{\frac{1-\nu}{2}}}, \quad D = D_2 \ln \frac{\mu R_0^2}{\varepsilon}.$$

851 Finally, the total number of oracle calls equals

$$\begin{aligned} \sum_{t=1}^{\tau} \sum_{k=0}^{N_t-1} m_k^t &= \mathcal{O} \left( \max \left\{ \sum_{t=1}^{\tau} N_t, \sum_{t=1}^{\tau} \frac{\sigma^2 R_0^2}{2^t \varepsilon_t^2} \ln \frac{M_\nu R_0^{1+\nu} \tau}{2^{\frac{(1+\nu)t}{2}} \varepsilon_t \beta} \right\} \right) \\ &= \mathcal{O} \left( \max \left\{ \hat{N}, \sum_{t=1}^{\tau} \frac{\sigma^2 \cdot 2^t}{\mu^2 R_0^2} \ln \frac{D}{\beta} \right\} \right) = \mathcal{O} \left( \max \left\{ \hat{N}, \frac{\sigma^2}{\mu \varepsilon} \ln \frac{D}{\beta} \right\} \right). \end{aligned}$$

852

□

## 853 D Additional experimental details

### 854 D.1 Main experiment hyper-parameters

855 In our experiments, we use standard implementations of Adam and SGD from PyTorch [32], we  
856 write only the parameters we changed from the default.

857 To conduct these experiments we used Nvidia RTX 2070s. The longest experiment (evolution of the  
858 noise distribution for image classification task) took 53 hours (we iterated several times over train  
859 dataset to build better histogram, see Appendix D.3).

#### 860 D.1.1 Image classification

861 For ResNet-18 + ImageNet-100 the parameters of the methods were chosen as follows:

- 862 • Adam:  $lr = 1e - 3$  and a batchsize of  $4 \times 32$
- 863 • SGD:  $lr = 1e - 2$ ,  $momentum = 0.9$  and a batchsize of 32
- 864 • clipped-SSTM:  $\nu = 1$ , stepsize parameter  $\alpha = 1e - 3$  (in code we use separately  $lr = 1e - 2$   
865 and  $L = 10$  and  $\alpha = \frac{lr}{L}$ ), norm clipping with clipping parameter  $B = 1$  and a batchsize of  
866  $2 \times 32$ . We also upper bounded the ratio  $A_k/A_{k+1}$  by 0.99 (see `a_k_ratio_upper_bound`  
867 parameter in code).
- 868 • clipped-SGD:  $lr = 5e - 2$ ,  $momentum = 0.9$ , coordinate-wise clipping with clipping  
869 parameter  $B = 0.1$  and a batchsize of 32

870 The main two parameters that we grid-searched were  $lr$  and batchsize. For both of them we used  
871 logarithmic grid (i.e. for  $lr$  we used  $1e - 5, 2e - 5, 5e - 5, 1e - 4, \dots, 1e - 2, 2e - 2, 5e - 2$  for  
872 Adam). Batchsize was chosen from  $32, 2 \cdot 32, 4 \cdot 32$  and  $8 \cdot 32$ . For SGD we also tried various  
873 momentum parameters.

874 For clipped-SSTM and clipped-SGD we used clipping level of 1 and 0.1 respectively. Too small  
875 choice of the clipping level, e.g. 0.01, slows down the convergence significantly.

876 Another important parameter for clipped-SSTM here, was `a_k_ratio_upper_bound` – we used it to  
877 upper bound the maximum ratio of  $A_k/A_{k+1}$ . Without this modification the method is too conservative.  
878 e.g., after  $10^4$  steps  $A_k/A_{k+1} \sim 0.9999$ . Effectively, it can be seen as momentum parameter of SGD.

#### 879 D.1.2 Text classification

880 For BERT + CoLA the parameters of the methods were chosen as follows:

- 881 • Adam:  $lr = 5e - 5$ ,  $weight\_decay = 5e - 4$  and a batchsize of 32
- 882 • SGD:  $lr = 1e - 3$ ,  $momentum = 0.9$  and a batchsize of 32
- 883 • clipped-SSTM:  $\nu = 1$ , stepsize parameter  $\alpha = 8e - 3$ , norm clipping with clipping  
884 parameter  $B = 1$  and a batchsize of  $8 \times 32$
- 885 • clipped-SGD:  $lr = 2e - 3$ ,  $momentum = 0.9$ , coordinate-wise clipping with clipping  
886 parameter  $B = 0.1$  and a batchsize of 32

887 There we used the same grid as in the previous task. The main difference here is that we didn't bound  
888 clipped-SSTM  $A_k/A_{k+1}$  ratio – there are only  $\sim 300$  steps of the method (because the batch size is  
889  $8 \cdot 32$ ), thus the method is still not too conservative.

### 890 D.2 On the relation between stepsize parameter $\alpha$ and batchsize

891 In our experiments, we noticed that clipped-SSTM show similar results when the ration  $bs^2/\alpha$  is kept  
892 unchanged, where  $bs$  is batchsize (see Fig. 3). We compare the performance of clipped-SSTM with  
893 4 different choices of  $\alpha$  and the batchsize.

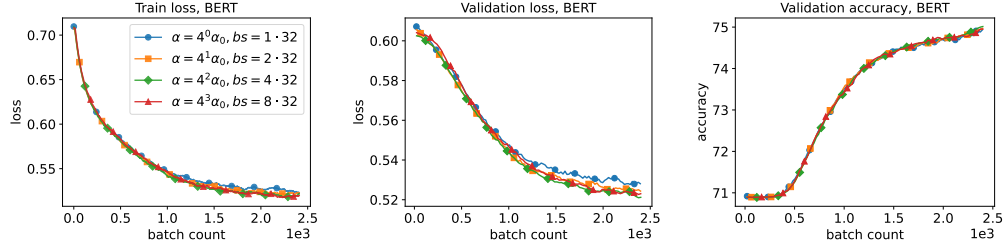

Figure 3: Train and validation loss + accuracy for **clipped-SSTM** with different parameters. Here  $\alpha_0 = 0.000125$ ,  $bs$  means batchsize. As we can see from the plots, increasing  $\alpha$  4 times and batchsize 2 times almost does not affect the method’s behavior.

894 Thm. B.1 explains this phenomenon in the convex case. For the case of  $\nu = 1$  we have (from (34)  
895 and (39)):

$$\alpha \sim \frac{1}{aM_1}, \quad \alpha_k \sim k\alpha, \quad m_k \sim \frac{Na\sigma^2\alpha_{k+1}^2}{C^2R_0^2\ln\frac{4N}{\beta}}, \quad N \sim \frac{a^{\frac{1}{2}}CR_0M_1^{\frac{1}{2}}}{\varepsilon^{\frac{1}{2}}} \sim \frac{CR_0}{\alpha^{\frac{1}{2}}\varepsilon^{\frac{1}{2}}},$$

896 whence

$$m_k \sim \frac{CR_0a\sigma^2\alpha^2(k+1)^2}{\alpha^{\frac{1}{2}}\varepsilon^{\frac{1}{2}}C^2R_0^2\ln\frac{4N}{\beta}} \sim \frac{\sigma^2\alpha^2(k+1)^2}{\alpha^{\frac{1}{2}}\alpha M_1\varepsilon^{\frac{1}{2}}CR_0\ln\frac{4N}{\beta}} \sim \alpha^{\frac{1}{2}},$$

897 where the dependencies on numerical constants and logarithmic factors are omitted. Therefore,  
898 the observed empirical relation between batchsize ( $m_k$ ) and  $\alpha$  correlates well with the established  
899 theoretical results for **clipped-SSTM**.

### 900 D.3 Evolution of the noise distribution

901 In this section, we provide our empirical study of the noise distribution evolution along the trajectories  
902 of different optimizers. As one can see from the plots, the noise distribution for ResNet-18 +  
903 ImageNet-100 task is always close to Gaussian distribution, whereas for BERT + CoLA task it is  
significantly heavy-tailed.

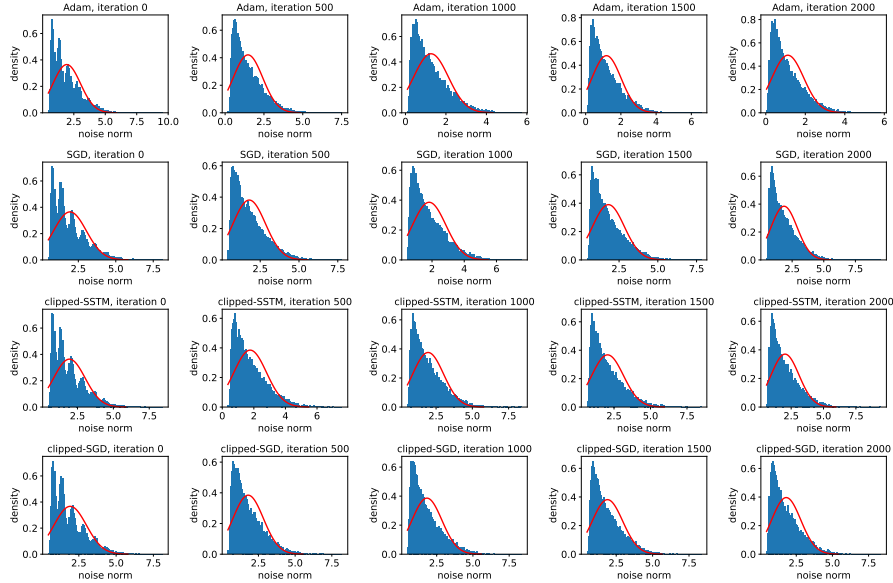

Figure 4: Evolution of the noise distribution for BERT + CoLA task.

904

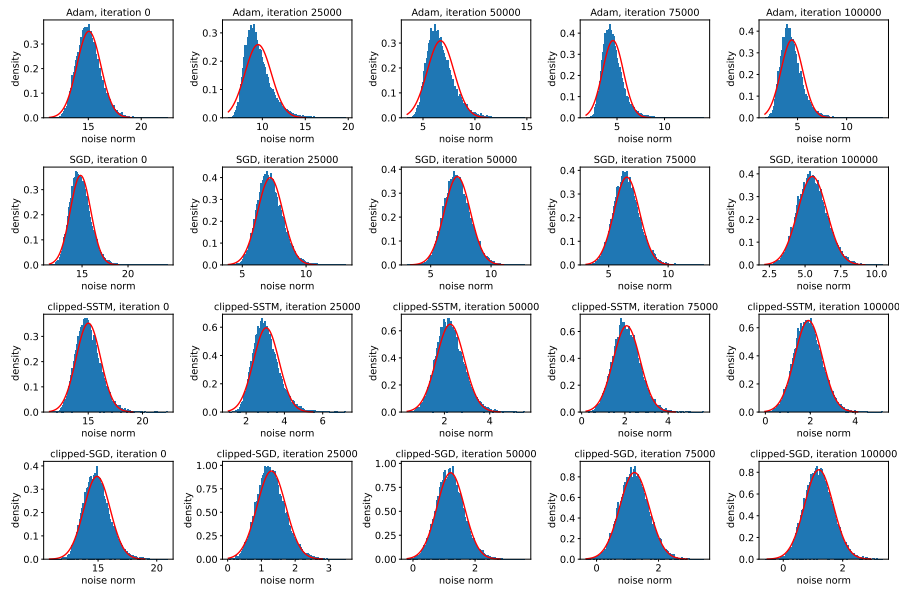

Figure 5: Evolution of the noise distribution for ResNet-18 + ImageNet-100 task.
